# Supplementary material
Source: Royal Society of Chemistry journal article supplement (doi:10.1039/d6ja00106h)
Supplement: d6ja00106h1.xlsx [file d6ja00106h1.xlsx]

## Sheet: Summary
																									NIST SRM 981
blank	202-Hg	204-Pb	206-Pb	207-Pb	208-Pb																					204/208	206/208	207/208		204-Pb and 204/208 are 204-Hg corrected
blk-01	-1.88023e-05	-3.57652e-07	7.19925e-05	9.71986e-05	0.000236875																				R_z	0.0272321	0.461233	0.421862
blk-02	4.72711e-06	2.48988e-05	5.58389e-05	6.83329e-05	0.000202755																				u(R_z)	9.9e-06	8.51e-05	0.000109
	-7.03758e-06	1.22706e-05	6.39157e-05	8.27657e-05	0.000219815			calculated
	-2.36414	1.45543	0.178709	0.246613	0.10976			calculated with GUM Workbench Pro
w/o blank corr	202-Hg	204-Pb	206-Pb	207-Pb	208-Pb	204/208	K_204/208	u(K_204/208)	K_204/208_av	plus u_K	min u_K	206/208	K_206/208	u(K_206/208)	K_206/208_av	plus u_K	min u_K	207/208	K_207/208	u(K_207/208)	K_207/208_av	plus u_K	min u_K		blank corr	202-Hg	204-Pb	206-Pb	207-Pb	208-Pb	204/208	K_204/208	u(K_204/208)	K_204/208_av	plus u_K	min u_K	206/208	K_206/208	u(K_206/208)	K_206/208_av	plus u_K	min u_K	207/208	K_207/208	u(K_207/208)	K_207/208_av	plus u_K	min u_K
z_ref_01	5.35821e-05	0.087763	1.50152	1.3804	3.28685	0.0266973	1.02003	0.000501	1.02017	1.02065	1.01969	0.456828	1.00964	0.000196	1.00965	1.00985	1.00945	0.419977	1.00449	0.000266	1.00448	1.00474	1.00421		z_ref_01	6.06197e-05	0.0877367	1.50146	1.38032	3.28663	0.0266949	1.02013	0.000501	1.02026	1.02076	1.01976	0.456839	1.00962	0.000196	1.00963	1.00982	1.00943	0.41998	1.00448	0.000266	1.00447	1.00474	1.00421
z_ref_02	-7.60874e-06	0.0921997	1.57788	1.45067	3.45394	0.0266946	1.02014	0.000467	1.02017	1.02065	1.01969	0.456836	1.00963	0.000194	1.00965	1.00985	1.00945	0.420005	1.00442	0.000264	1.00448	1.00474	1.00421		z_ref_02	-5.7117e-07	0.0921876	1.57782	1.45059	3.45372	0.0266922	1.02023	0.000467	1.02026	1.02076	1.01976	0.456846	1.0096	0.000194	1.00963	1.00982	1.00943	0.420008	1.00441	0.000264	1.00447	1.00474	1.00421
z_ref_03	6.63123e-05	0.0897104	1.5353	1.41143	3.36068	0.0266895	1.02033	0.000379	1.02017	1.02065	1.01969	0.456842	1.00961	0.000196	1.00965	1.00985	1.00945	0.419982	1.00448	0.000265	1.00448	1.00474	1.00421		z_ref_03	7.33499e-05	0.0896811	1.53524	1.41134	3.36046	0.0266871	1.02042	0.000466	1.02026	1.02076	1.01976	0.456853	1.00959	0.000196	1.00963	1.00982	1.00943	0.419985	1.00447	0.000265	1.00447	1.00474	1.00421
z_ref_04	5.46263e-05	0.0917839	1.57044	1.44382	3.43797	0.0266935	1.02018	0.000551	1.02017	1.02065	1.01969	0.456793	1.00972	0.000199	1.00965	1.00985	1.00945	0.419961	1.00453	0.000265	1.00448	1.00474	1.00421		z_ref_04	6.16639e-05	0.0917573	1.57038	1.44373	3.43775	0.0266912	1.02027	0.000551	1.02026	1.02076	1.01976	0.456804	1.0097	0.000194	1.00963	1.00982	1.00943	0.419964	1.00452	0.000265	1.00447	1.00474	1.00421
z_ref	4.1728e-05	0.0903643	1.54629	1.42158	3.38486	0.0266937	1.02017	0.000478626				0.456825	1.00965	0.000196258				0.419982	1.00448	0.000265001						4.87656e-05	0.0903407	1.54622	1.4215	3.38464	0.0266914	1.02026	0.000497455				0.456835	1.00963	0.000195003				0.419984	1.00447	0.000265001
	0.800267	0.0226596	0.0227303	0.0227566	0.0227459	0.000121112		0.000469163				4.75746e-05		0.000194382				4.33911e-05		0.000263819						0.684777	0.0227155	0.0227312	0.0227579	0.0227474	0.000120571		0.000487577				4.77593e-05		0.000193143				4.33583e-05		0.000263821
z_14_01	5.13867e-05	0.0554931	0.949663	0.873093	2.07881	0.0266886	1.02036	0.000699	1.02049	1.02104	1.01995	0.45683	1.00964	0.000201	1.00964	1.00985	1.00944	0.419997	1.00444	0.000272	1.00448	1.00475	1.00421		z_14_01	5.84243e-05	0.0554672	0.949599	0.87301	2.07859	0.0266848	1.02051	0.000699	1.02064	1.02126	1.02001	0.456848	1.0096	0.000201	1.00961	1.00981	1.0094	0.420002	1.00443	0.000272	1.00447	1.00474	1.0042
z_14_02	-6.33136e-05	0.0562615	0.963975	0.886118	2.11007	0.0266705	1.02106	0.000585	1.02049	1.02104	1.01995	0.456846	1.0096	0.000199	1.00964	1.00985	1.00944	0.419948	1.00456	0.000268	1.00448	1.00475	1.00421		z_14_02	-5.62761e-05	0.0562623	0.963912	0.886035	2.10985	0.0266667	1.0212	0.000374	1.02064	1.02126	1.02001	0.456863	1.00957	0.000199	1.00961	1.00981	1.0094	0.419952	1.00455	0.000268	1.00447	1.00474	1.0042
z_14_03	3.46083e-05	0.0586828	1.00362	0.922789	2.19701	0.0267069	1.01967	7.58e-06	1.02049	1.02104	1.01995	0.456811	1.00968	0.0002	1.00964	1.00985	1.00944	0.420022	1.00438	0.000267	1.00448	1.00475	1.00421		z_14_03	4.16459e-05	0.0586608	1.00355	0.922707	2.19679	0.0267033	1.01981	0.000759	1.02064	1.02126	1.02001	0.456827	1.00965	0.000216	1.00961	1.00981	1.0094	0.420026	1.00437	0.000267	1.00447	1.00474	1.0042
z_14_04	2.57169e-06	0.0589143	1.00892	0.927511	2.20857	0.026675	1.02089	0.000605	1.02049	1.02104	1.01995	0.456823	1.00965	0.000203	1.00964	1.00985	1.00944	0.419961	1.00453	0.00027	1.00448	1.00475	1.00421		z_14_04	9.60927e-06	0.0588998	1.00886	0.927428	2.20835	0.0266713	1.02103	0.000605	1.02064	1.02126	1.02001	0.45684	1.00962	0.000203	1.00961	1.00981	1.0094	0.419965	1.00452	0.00027	1.00447	1.00474	1.0042
z_14	6.31326e-06	0.0573379	0.981545	0.902378	2.14861	0.0266853	1.02049	0.000547017				0.456827	1.00964	0.000200755				0.419982	1.00448	0.000269257						1.33508e-05	0.0573225	0.981481	0.902295	2.14839	0.0266815	1.02064	0.000626615				0.456844	1.00961	0.000204858				0.419986	1.00447	0.000269257
	8.02168	0.0299646	0.0297724	0.0298065	0.0297959	0.000613557		0.000536031				3.22349e-05		0.000198838				8.03708e-05		0.000268057						3.79324	0.0299545	0.0297744	0.0298093	0.029799	0.000614728		0.000613944				3.3024e-05		0.000202909				8.03357e-05		0.000268059
z_14c_01	4.8364e-05	0.0386163	0.660849	0.606957	1.44596	0.0266986	1.01998	0.000765	1.02072	1.02156	1.01988	0.457031	1.0092	0.000207	1.00906	1.00927	1.00885	0.41976	1.00501	0.00028	1.00492	1.00519	1.00464		z_14c_01	5.54016e-05	0.0385912	0.660785	0.606874	1.44574	0.0266931	1.02019	0.000766	1.02093	1.02177	1.02008	0.457056	1.00914	0.000207	1.00901	1.00922	1.0088	0.419767	1.00499	0.00028	1.0049	1.00517	1.00463
z_14c_02	-8.60278e-06	0.0385733	0.660943	0.607058	1.44615	0.0266748	1.02089	0.000928	1.02072	1.02156	1.01988	0.457034	1.00919	0.000201	1.00906	1.00927	1.00885	0.419775	1.00497	0.00027	1.00492	1.00519	1.00464		z_14c_02	-1.56521e-06	0.0385614	0.660879	0.606975	1.44593	0.0266692	1.02111	0.000928	1.02093	1.02177	1.02008	0.457059	1.00913	0.000201	1.00901	1.00922	1.0088	0.419782	1.00496	0.00027	1.0049	1.00517	1.00463
z_14c_03	3.94508e-05	0.0405347	0.694544	0.637949	1.51951	0.0266697	1.02109	0.000842	1.02072	1.02156	1.01988	0.457083	1.00908	0.000216	1.00906	1.00927	1.00885	0.419837	1.00483	0.000282	1.00492	1.00519	1.00464		z_14c_03	4.64884e-05	0.0405117	0.69448	0.637866	1.51929	0.0266644	1.02129	0.000843	1.02093	1.02177	1.02008	0.457107	1.00903	0.000216	1.00901	1.00922	1.0088	0.419843	1.00481	0.000267	1.0049	1.00517	1.00463
z_14c_04	-2.747e-05	0.0400096	0.685898	0.629796	1.50016	0.0266743	1.02091	0.000827	1.02072	1.02156	1.01988	0.457218	1.00878	0.00021	1.00906	1.00927	1.00885	0.41982	1.00487	0.000272	1.00492	1.00519	1.00464		z_14c_04	-2.04324e-05	0.040002	0.685834	0.629713	1.49994	0.0266689	1.02112	0.000828	1.02093	1.02177	1.02008	0.457242	1.00873	0.00021	1.00901	1.00922	1.0088	0.419826	1.00485	0.000272	1.0049	1.00517	1.00463
z_14c	1.29355e-05	0.0394335	0.675558	0.62044	1.47795	0.0266794	1.02072	0.000842511				0.457091	1.00906	0.00020857				0.419798	1.00492	0.000276047						1.99731e-05	0.0394166	0.675494	0.620357	1.47773	0.0266739	1.02093	0.000843234				0.457116	1.00901	0.00020857				0.419804	1.0049	0.000272293
	2.84209	0.0251568	0.0256007	0.0255686	0.0254816	0.00048931		0.000825409				0.000191459		0.000206697				8.62328e-05		0.000274696						1.84067	0.0251774	0.0256031	0.0255721	0.0254854	0.000486038		0.000825948				0.000190604		0.000206708				8.58591e-05		0.000270964
z_14dc_01	-1.1199e-05	0.0270547	0.463235	0.425664	1.01375	0.0266903	1.0203	0.00128	1.02117	1.02226	1.02008	0.456952	1.00937	0.000219	1.00929	1.0095	1.00908	0.41989	1.0047	0.0003	1.00482	1.00511	1.00454		z_14dc_01	-4.1614e-06	0.0270434	0.463171	0.425581	1.01353	0.0266824	1.0206	0.00128	1.02147	1.02256	1.02038	0.456988	1.00929	0.000219	1.00921	1.00942	1.009	0.419899	1.00467	0.0003	1.0048	1.00509	1.00451
z_14dc_02	7.46057e-06	0.0274016	0.470109	0.431902	1.0287	0.0266357	1.02239	0.00116	1.02117	1.02226	1.02008	0.456995	1.00927	0.000199	1.00929	1.0095	1.00908	0.419854	1.00478	0.00029	1.00482	1.00511	1.00454		z_14dc_02	1.44981e-05	0.0273859	0.470045	0.431819	1.02848	0.0266279	1.02269	0.00116	1.02147	1.02256	1.02038	0.457031	1.0092	0.000199	1.00921	1.00942	1.009	0.419863	1.00476	0.00029	1.0048	1.00509	1.00451
z_14dc_03	3.81654e-05	0.0273376	0.468594	0.430473	1.02545	0.0266508	1.02181	0.00102	1.02117	1.02226	1.02008	0.456966	1.00934	0.000209	1.00929	1.0095	1.00908	0.419791	1.00493	0.000275	1.00482	1.00511	1.00454		z_14dc_03	4.52029e-05	0.0273148	0.46853	0.430391	1.02523	0.0266429	1.02211	0.00102	1.02147	1.02256	1.02038	0.457001	1.00926	0.000209	1.00921	1.00942	1.009	0.4198	1.00491	0.000282	1.0048	1.00509	1.00451
z_14dc_04	5.13342e-06	0.0273507	0.46828	0.430137	1.02458	0.0266936	1.02017	0.000843	1.02117	1.02226	1.02008	0.457047	1.00916	0.000212	1.00929	1.0095	1.00908	0.419819	1.00487	0.000278	1.00482	1.00511	1.00454		z_14dc_04	1.2171e-05	0.0273356	0.468216	0.430055	1.02436	0.0266858	1.02047	0.000843	1.02147	1.02256	1.02038	0.457083	1.00908	0.000212	1.00921	1.00942	1.009	0.419828	1.00485	0.000278	1.0048	1.00509	1.00451
z_14dc	9.8901e-06	0.0272861	0.467555	0.429544	1.02312	0.0266676	1.02117	0.00108801				0.45699	1.00929	0.000209873				0.419838	1.00482	0.000285924						1.69277e-05	0.0272699	0.467491	0.429461	1.0229	0.0266597	1.02147	0.00108801				0.457026	1.00921	0.000209873				0.419848	1.0048	0.000287623
	2.08264	0.005745	0.00639159	0.00628028	0.00634442	0.00108084		0.00106545				9.24028e-05		0.000207942				0.000102222		0.000284552						1.21679	0.00564606	0.00639247	0.00628149	0.00634578	0.00108009		0.00106514				9.21645e-05		0.000207959				0.000102332		0.000286249
z_135_01	-1.49838e-05	0.0571913	0.978116	0.899214	2.14101	0.0267139	1.0194	0.000697	1.02031	1.02093	1.01968	0.456848	1.0096	0.000206	1.00966	1.00986	1.00946	0.419996	1.00444	0.000264	1.00445	1.00472	1.00418		z_135_01	-7.94618e-06	0.0571808	0.978052	0.899131	2.14079	0.0267102	1.01954	0.000697	1.02045	1.02108	1.01982	0.456866	1.00956	0.000206	1.00963	1.00983	1.00943	0.420001	1.00443	0.000264	1.00444	1.00471	1.00415
z_135_02	3.87189e-05	0.0583869	0.999347	0.918913	2.1877	0.0266846	1.02052	0.000561	1.02031	1.02093	1.01968	0.456803	1.0097	0.000201	1.00966	1.00986	1.00946	0.420037	1.00435	0.000267	1.00445	1.00472	1.00418		z_135_02	4.57564e-05	0.058364	0.999283	0.918831	2.18748	0.026681	1.02066	0.000561	1.02045	1.02108	1.01982	0.45682	1.00966	0.000193	1.00963	1.00983	1.00943	0.420042	1.00433	0.000267	1.00444	1.00471	1.00415
z_135_03	5.9555e-05	0.0589281	1.00929	0.927862	2.20922	0.0266671	1.02119	0.000628	1.02031	1.02093	1.01968	0.456851	1.00959	0.000195	1.00966	1.00986	1.00946	0.419994	1.00445	0.000271	1.00445	1.00472	1.00418		z_135_03	6.65926e-05	0.0589003	1.00922	0.927779	2.209	0.0266634	1.02133	0.000628	1.02045	1.02108	1.01982	0.456868	1.00956	0.000195	1.00963	1.00983	1.00943	0.419998	1.00444	0.000271	1.00444	1.00471	1.00415
z_135_04	2.67829e-05	0.0584399	0.999835	0.919236	2.18892	0.0266949	1.02013	0.000612	1.02031	1.02093	1.01968	0.456771	1.00977	0.000197	1.00966	1.00986	1.00946	0.41995	1.00456	0.000267	1.00445	1.00472	1.00418		z_135_04	3.38205e-05	0.0584198	0.999771	0.919153	2.1887	0.0266912	1.02027	0.000612	1.02045	1.02108	1.01982	0.456787	1.00973	0.000197	1.00963	1.00983	1.00943	0.419954	1.00454	0.000267	1.00444	1.00471	1.00415
z_135	2.75183e-05	0.0582365	0.996646	0.916306	2.18171	0.0266901	1.02031	0.00062639				0.456818	1.00966	0.000199794				0.419994	1.00445	0.000267262						3.45558e-05	0.0582162	0.996582	0.916224	2.18149	0.0266864	1.02045	0.00062639				0.456835	1.00963	0.000197812				0.419999	1.00444	0.000267262
	1.14123	0.0126759	0.0132174	0.0132327	0.013236	0.00073377		0.000613923				8.46255e-05		0.000197882				8.53694e-05		0.000266078						0.908811	0.0125575	0.0132182	0.0132339	0.0132373	0.000732209		0.000613838				8.4745e-05		0.000195926				8.53847e-05		0.000266081
z_135c_01	5.55584e-06	0.0410029	0.702574	0.645438	1.53744	0.0266686	1.02113	0.000723	1.02074	1.02151	1.01998	0.456978	1.00931	0.000201	1.00927	1.00947	1.00906	0.419815	1.00488	0.000273	1.00482	1.00509	1.00455		z_135c_01	1.25934e-05	0.0409877	0.70251	0.645355	1.53722	0.0266633	1.02133	0.000724	1.02094	1.02171	1.02017	0.457002	1.00926	0.000201	1.00922	1.00941	1.00903	0.419821	1.00486	0.000259	1.00481	1.00506	1.00455
z_135c_02	1.48849e-05	0.0412874	0.706901	0.649402	1.54669	0.0266919	1.02024	0.000887	1.02074	1.02151	1.01998	0.45704	1.00917	0.000193	1.00927	1.00947	1.00906	0.419865	1.00476	0.000267	1.00482	1.00509	1.00455		z_135c_02	2.19224e-05	0.0412701	0.706837	0.649319	1.54647	0.0266867	1.02044	0.000886	1.02094	1.02171	1.02017	0.457064	1.00912	0.000186	1.00922	1.00941	1.00903	0.419871	1.00474	0.000259	1.00481	1.00506	1.00455
z_135c_03	9.30251e-05	0.0426697	0.730767	0.671352	1.59909	0.0266702	1.02107	0.000718	1.02074	1.02151	1.01998	0.45699	1.00928	0.000224	1.00927	1.00947	1.00906	0.419835	1.00483	0.000267	1.00482	1.00509	1.00455		z_135c_03	0.000100063	0.0426341	0.730703	0.671269	1.59887	0.0266651	1.02126	0.000719	1.02094	1.02171	1.02017	0.457013	1.00923	0.000186	1.00922	1.00941	1.00903	0.419841	1.00481	0.000259	1.00481	1.00506	1.00455
z_135c_04	9.77762e-06	0.0422256	0.7231	0.664327	1.58233	0.0266842	1.02053	0.000726	1.02074	1.02151	1.01998	0.456984	1.0093	0.000209	1.00927	1.00947	1.00906	0.41984	1.00482	0.000272	1.00482	1.00509	1.00455		z_135c_04	1.68152e-05	0.0422095	0.723036	0.664245	1.58211	0.0266792	1.02073	0.000726	1.02094	1.02171	1.02017	0.457008	1.00925	0.000186	1.00922	1.00941	1.00903	0.419846	1.0048	0.000259	1.00481	1.00506	1.00455
z_135c	3.08109e-05	0.0417964	0.715836	0.65763	1.56639	0.0266787	1.02074	0.000766828				0.456998	1.00927	0.000207067				0.419839	1.00482	0.000269764						3.78484e-05	0.0417753	0.715772	0.657547	1.56617	0.0266736	1.02094	0.000767009				0.457022	1.00922	0.000189861				0.419845	1.00481	0.000259
	1.35183	0.0187147	0.0185927	0.0186132	0.0186109	0.000421598		0.000751244				6.23095e-05		0.000205166				4.95026e-05		0.00026847						1.10047	0.0185507	0.0185944	0.0186156	0.0186136	0.000421205		0.000751276				6.25983e-05		0.000188127				4.94973e-05		0.000257761
z_135dc_01	5.22001e-05	0.0234672	0.401573	0.368934	0.878657	0.0266944	1.02014	0.00149	1.02052	1.02186	1.01918	0.457032	1.00919	0.000222	1.00917	1.00939	1.00895	0.419884	1.00471	0.000279	1.00485	1.00513	1.00457		z_135dc_01	5.92377e-05	0.0234412	0.40151	0.368851	0.878437	0.0266853	1.02049	0.00149	1.02087	1.02221	1.01953	0.457073	1.0091	0.000222	1.00907	1.0093	1.00885	0.419895	1.00468	0.000279	1.00483	1.00511	1.00454
z_135dc_02	1.06007e-05	0.0231872	0.397895	0.36543	0.87061	0.026631	1.02257	0.00123	1.02052	1.02186	1.01918	0.457031	1.0092	0.000211	1.00917	1.00939	1.00895	0.419739	1.00506	0.00028	1.00485	1.00513	1.00457		z_135dc_02	1.76383e-05	0.0231708	0.397831	0.365347	0.87039	0.0266218	1.02293	0.00124	1.02087	1.02221	1.01953	0.457073	1.0091	0.000211	1.00907	1.0093	1.00885	0.41975	1.00503	0.00028	1.00483	1.00511	1.00454
z_135dc_03	7.15593e-06	0.0237164	0.405227	0.372264	0.886589	0.0267484	1.01808	0.00128	1.02052	1.02186	1.01918	0.457063	1.00912	0.000222	1.00917	1.00939	1.00895	0.419884	1.00471	0.000283	1.00485	1.00513	1.00457		z_135dc_03	1.41935e-05	0.0237008	0.405163	0.372181	0.886369	0.0267394	1.01843	0.00128	1.02087	1.02221	1.01953	0.457104	1.00903	0.000222	1.00907	1.0093	1.00885	0.419895	1.00469	0.000283	1.00483	1.00511	1.00454
z_135dc_04	-3.39594e-06	0.0231858	0.397435	0.365039	0.869567	0.0266644	1.02129	0.00134	1.02052	1.02186	1.01918	0.457049	1.00915	0.000225	1.00917	1.00939	1.00895	0.419795	1.00493	0.000289	1.00485	1.00513	1.00457		z_135dc_04	3.64164e-06	0.0231727	0.397371	0.364957	0.869347	0.0266551	1.02165	0.00134	1.02087	1.02221	1.01953	0.457091	1.00906	0.000226	1.00907	1.0093	1.00885	0.419806	1.0049	0.000289	1.00483	1.00511	1.00454
z_135dc	1.66402e-05	0.0233892	0.400533	0.367917	0.876356	0.0266846	1.02052	0.00133856				0.457044	1.00917	0.000220065				0.419826	1.00485	0.000282777						2.36778e-05	0.0233714	0.400469	0.367834	0.876136	0.0266754	1.02087	0.00134087				0.457085	1.00907	0.000220321				0.419836	1.00483	0.000282777
	1.46891	0.0109096	0.00907915	0.0092033	0.00905969	0.00186723		0.00131164				3.38042e-05		0.000218066				0.000169857		0.000281412						1.03232	0.0108559	0.0090806	0.00920537	0.00906196	0.00187129		0.00131345				3.33581e-05		0.000218339				0.000169696		0.000281419

## Sheet: blk-01
Cycle	Time	202Hg	204Pb	206Pb	207Pb	208Pb	204Pb/208Pb (1)	206Pb/208Pb (2)	207Pb/208Pb (3)
1	1.75516e+09	4.733e-05	0.000267903	-8.10855e-05	0.000232938	0.000280185	0.956165	-0.289399	0.831371
2	1.75516e+09	1.27181e-05	9.82629e-05	6.7063e-05	6.21997e-05	0.000540326	0.181859	0.124116	0.115115
3	1.75516e+09	-2.37635e-05	-3.57418e-05	9.096e-05	0.000115965	0.000488292	-0.0731977	0.186282	0.237491
4	1.75516e+09	3.14271e-05	1.95446e-05	5.55927e-05	8.10644e-05	0.000165745	0.11792	0.335411	0.489091
5	1.75516e+09	-2.09572e-05	0.000266966	4.79459e-05	0.000133887	0.000310453	0.859925	0.154439	0.431265
6	1.75516e+09	9.59759e-05	-0.000208141	0.000274508	0.000251806	0.000253702	-0.820413	1.08201	0.992526
7	1.75516e+09	-0.000136941	-8.16553e-05	0.000220013	0.00018294	0.000320857	-0.254491	0.685705	0.570159
8	1.75516e+09	-8.92398e-05	0.000199481	0.000147359	0.000170676	0.000165745	1.20354	0.889071	1.02975
9	1.75516e+09	-0.000193058	-0.000167854	9.71262e-06	-6.22981e-05	0.000158179	-1.06117	0.0614026	-0.393845
10	1.75516e+09	7.07172e-05	-1.6064e-05	3.45641e-05	0.000120681	4.65898e-05	-0.344796	0.741881	2.5903
11	1.75516e+09	5.10719e-05	-0.000118197	6.84518e-06	2.54146e-05	0.000193172	-0.611876	0.0354358	0.131565
12	1.75516e+09	-5.99058e-06	-0.000265288	0.000170302	0.00019426	0.000241407	-1.09893	0.705457	0.8047
13	1.75516e+09	-4.1536e-05	-6.85374e-05	8.80923e-05	0.000256523	0.000182768	-0.374996	0.481989	1.40354
14	1.75516e+09	-3.40529e-05	-3.10567e-05	0.000133976	-4.53221e-05	0.000303832	-0.102217	0.440955	-0.149168
15	1.75516e+09	5.20074e-05	1.01738e-05	-0.000221567	-3.82381e-06	0.000110894	0.0917434	-1.99801	-0.0344817
16	1.75516e+09	0.000149302	4.76575e-05	0.000183686	-3.40045e-05	0.000269781	0.176653	0.680869	-0.126045
17	1.75516e+09	-0.000140682	-0.000152864	-4.38115e-05	5.84268e-05	5.22635e-05	-2.92487	-0.83828	1.11793
18	1.75516e+09	-8.73691e-05	0.000140436	0.000255387	8.20076e-05	0.000386125	0.363706	0.661409	0.212386
19	1.75516e+09	-5.27607e-05	9.26399e-05	-7.49186e-06	0.000116908	5.03723e-05	1.83911	-0.14873	2.32089
20	1.75516e+09	-6.02437e-05	-4.8193e-06	7.80099e-06	3.72151e-06	0.000216816	-0.0222276	0.0359798	0.0171644
***	Cup	L3	L1	C	H1	H2	L1 | H2	C | H2	H1 | H2
***	Info	tbdgy	tbdgy	tbdgy	tbdgy	tbdgy	tbdgy - St	tbdgy - St	tbdgy - St
***	Mean	-1.88023e-05	-3.57652e-07	7.19925e-05	9.71986e-05	0.000236875	-0.0949278	0.201399	0.629585
***	StdErr (%)	-102.043	-9258.36	37.2097	22.5653	12.6329	-234.31	76.3687	28.0482
***	StdErr (abs)	1.91865e-05	3.31127e-05	2.67882e-05	2.19331e-05	2.99243e-05	0.222426	0.153806	0.176588
***	StdDev (%)	-456.352	-41404.6	166.407	100.915	56.4963	-1047.87	341.531	125.436
***	StdDev (abs)	8.58045e-05	0.000148085	0.000119801	9.8088e-05	0.000133826	0.994718	0.687842	0.789723
***	Valid Values	20 (20)	20 (20)	20 (20)	20 (20)	20 (20)	20 (20)	20 (20)	20 (20)

## Sheet: blk-02
Cycle	Time	202Hg	204Pb	206Pb	207Pb	208Pb	204Pb/208Pb (1)	206Pb/208Pb (2)	207Pb/208Pb (3)
1	1.75517e+09	7.58606e-05	-4.29071e-05	5.43501e-05	-3.34947e-05	0.000426014	-0.100718	0.127578	-0.0786235
2	1.75517e+09	-0.000169211	8.64112e-05	9.44971e-05	8.91213e-05	-3.45676e-05	-2.49978	-2.73369	-2.57818
3	1.75517e+09	-0.000114028	-1.57329e-05	0.000105012	-7.40489e-05	4.39149e-05	-0.35826	2.39127	-1.68619
4	1.75517e+09	-0.000242159	-0.000114119	0.000111704	0.000113646	0.000239675	-0.476139	0.466062	0.474169
5	1.75517e+09	0.000246137	-0.000254652	-0.000123425	4.00731e-05	0.000143209	-1.77819	-0.861853	0.279823
6	1.75517e+09	-0.000117769	-0.000124425	-0.000105266	0.000171188	0.000207519	-0.599585	-0.507263	0.82493
7	1.75517e+09	-0.000200074	0.000107966	0.000200608	0.000110817	0.000350339	0.308175	0.572611	0.316312
8	1.75517e+09	-7.56791e-05	-4.47812e-05	-0.000115779	-0.00020136	0.000286966	-0.15605	-0.40346	-0.701685
9	1.75517e+09	-4.94887e-05	-3.35368e-05	7.92028e-05	-0.000227763	0.00042696	-0.0785479	0.185504	-0.533453
10	1.75517e+09	-2.32977e-05	-0.000112245	2.18512e-05	7.78023e-05	1.46014e-05	-7.68724	1.49651	5.3284
11	1.75517e+09	-2.23623e-05	0.000143579	6.86881e-05	0.000124023	-7.1467e-06	-20.0903	-9.61117	-17.3538
12	1.75517e+09	8.78049e-08	-0.000156281	3.81005e-05	7.11996e-05	4.58061e-05	-3.41179	0.831779	1.55437
13	1.75517e+09	-1.02019e-05	0.00013327	7.34675e-05	0.000211753	5.80991e-05	2.29384	1.26452	3.64468
14	1.75517e+09	0.000101119	5.736e-05	9.54531e-05	0.000444794	0.000299262	0.191671	0.318962	1.4863
15	1.75517e+09	0.000262043	8.35997e-05	0.000152809	2.5925e-05	0.000152666	0.5476	1.00094	0.169816
16	1.75517e+09	2.90866e-05	0.000217621	-5.46125e-05	0.000153265	0.00015834	1.37439	-0.344906	0.967948
17	1.75517e+09	9.08287e-05	6.95426e-05	7.72911e-05	-4.85848e-05	0.000372095	0.186895	0.207719	-0.130571
18	1.75517e+09	0.000121701	0.000332913	-5.17452e-05	0.00010327	0.000244404	1.36214	-0.21172	0.422539
19	1.75517e+09	6.55701e-05	1.42532e-05	-2.49835e-05	0.000159868	0.000513993	0.0277304	-0.0486066	0.311032
20	1.75517e+09	0.000126379	0.00015014	0.000419556	5.51646e-05	0.000112947	1.3293	3.71464	0.488413
***	Cup	L3	L1	C	H1	H2	L1 | H2	C | H2	H1 | H2
***	Info	tbdgy	tbdgy	tbdgy	tbdgy	tbdgy	tbdgy - St	tbdgy - St	tbdgy - St
***	Mean	4.72711e-06	2.48988e-05	5.58389e-05	6.83329e-05	0.000202755	-1.48074	-0.107229	-0.339689
***	StdErr (%)	644.268	126.46	49.6484	47.7556	17.704	-73.6467	-538.577	-285.739
***	StdErr (abs)	3.04553e-05	3.1487e-05	2.77231e-05	3.26328e-05	3.58956e-05	1.09052	0.577509	0.970623
***	StdDev (%)	2881.25	565.547	222.034	213.57	79.1745	-329.358	-2408.59	-1277.86
***	StdDev (abs)	0.0001362	0.000140814	0.000123982	0.000145938	0.00016053	4.87694	2.5827	4.34076
***	Valid Values	20 (20)	20 (20)	20 (20)	20 (20)	20 (20)	20 (20)	20 (20)	20 (20)

## Sheet: z_14_01
											M(202Hg)	g/mol	201.971	8e-07	K(204Hg)	1	0.990263			M	Meng Wang et al 2021 Chinese Phys. C 45 030003
											M(204Hg)	g/mol	203.973	5e-07	K(204Pb)	1	1.02036			x	De Laeter et al., 2003 IUPAC, Pure and Applied Chemistry 75, 683–800
											M(206Pb)	g/mol	205.974	1.2e-06	K(206Pb)	1	1.00964			R_cert	NIST SRM 981 certificate of analysis
											M(208Pb)	g/mol	207.977	1.2e-06	K(207Pb)	1	1.00444
											x(202Hg)	mol/mol	0.2986	0.0026
											x(204Hg)	mol/mol	0.0687	0.0015
											R204,cert	mol/mol	0.0272321
											R206,cert	mol/mol	0.461233
											R207,cert	mol/mol	0.421862
											g	1	-1.02006
														blank correction
Cycle	Time	202Hg	204Pb	206Pb	207Pb	208Pb	204Pb/208Pb (1)	206Pb/208Pb (2)	207Pb/208Pb (3)		204Pb_corr	204Pb_corr Pb/208Pb (1)		202Hg	204Pb	206Pb	207Pb	208Pb	204Pb/208Pb (1)	206Pb/208Pb (2)	207Pb/208Pb (3)		204Pb_corr_bl	204Pb_corr_bl Pb/208Pb (1)
1	1.75516e+09	6.12043e-05	0.0562791	0.960886	0.883323	2.10229	0.0267704	0.457067	0.420173		0.0562649	0.0267637		6.82419e-05	0.0562668	0.960822	0.88324	2.10207	0.0267674	0.457084	0.420177		0.056251	0.0267598
2	1.75516e+09	0.000171599	0.0561078	0.958546	0.881417	2.09827	0.0267401	0.456827	0.420069		0.056068	0.0267211		0.000178636	0.0560956	0.958482	0.881334	2.09805	0.026737	0.456845	0.420073		0.0560541	0.0267172
3	1.75516e+09	0.000187504	0.0562858	0.962059	0.884716	2.10666	0.026718	0.456674	0.41996		0.0562423	0.0266973		0.000194542	0.0562735	0.961995	0.884633	2.10644	0.0267149	0.456692	0.419965		0.0562283	0.0266935
4	1.75516e+09	-0.000131488	0.0561886	0.960437	0.883108	2.10284	0.0267204	0.456734	0.41996		0.0562192	0.0267349		-0.000124451	0.0561764	0.960373	0.883025	2.10262	0.0267174	0.456751	0.419965		0.0562053	0.0267311
5	1.75516e+09	-6.32084e-05	0.0560742	0.963207	0.885735	2.10926	0.0265847	0.456655	0.419926		0.0560889	0.0265917		-5.61708e-05	0.0560619	0.963143	0.885652	2.10905	0.0265817	0.456673	0.41993		0.056075	0.0265878
6	1.75516e+09	7.43013e-05	0.0555001	0.951077	0.873377	2.08074	0.0266732	0.457086	0.419743		0.0554828	0.0266649		8.13389e-05	0.0554878	0.951013	0.873294	2.08052	0.0266701	0.457103	0.419748		0.0554689	0.0266611
7	1.75516e+09	-3.14051e-05	0.0558068	0.958556	0.88084	2.09842	0.0265946	0.456799	0.419763		0.0558141	0.0265981		-2.43676e-05	0.0557945	0.958492	0.880757	2.0982	0.0265916	0.456816	0.419767		0.0558002	0.0265943
8	1.75516e+09	7.71078e-05	0.0553568	0.949894	0.873533	2.07878	0.0266295	0.456949	0.420215		0.0553389	0.0266209		8.41454e-05	0.0553446	0.94983	0.87345	2.07856	0.0266264	0.456966	0.42022		0.055325	0.026617
9	1.75516e+09	1.25599e-05	0.0557904	0.957461	0.880545	2.09557	0.0266231	0.456899	0.420194		0.0557875	0.0266217		1.95975e-05	0.0557782	0.957397	0.880462	2.09535	0.02662	0.456916	0.420199		0.0557736	0.0266179
10	1.75516e+09	-5.01131e-05	0.0562108	0.960232	0.882476	2.10121	0.0267516	0.45699	0.419985		0.0562224	0.0267572		-4.30755e-05	0.0561985	0.960168	0.882393	2.10099	0.0267486	0.457008	0.419989		0.0562085	0.0267534
11	1.75516e+09	0.000208088	0.0563147	0.964127	0.886348	2.111	0.0266767	0.456715	0.41987		0.0562663	0.0266538		0.000215125	0.0563024	0.964063	0.886265	2.11078	0.0266737	0.456732	0.419875		0.0562524	0.02665
12	1.75516e+09	-7.25621e-05	0.0546112	0.937269	0.861516	2.05162	0.0266186	0.456844	0.41992		0.0546281	0.0266268		-6.55246e-05	0.0545989	0.937206	0.861433	2.0514	0.0266154	0.456861	0.419924		0.0546141	0.0266229
13	1.75516e+09	-4.27802e-06	0.0558116	0.953283	0.876831	2.08642	0.0267499	0.456898	0.420255		0.0558126	0.0267504		2.75955e-06	0.0557993	0.953219	0.876748	2.0862	0.0267468	0.456916	0.42026		0.0557987	0.0267465
14	1.75516e+09	8.8334e-05	0.0555837	0.949821	0.873147	2.07838	0.0267438	0.457001	0.42011		0.0555632	0.0267339		9.53716e-05	0.0555714	0.949757	0.873065	2.07816	0.0267407	0.457018	0.420114		0.0555493	0.02673
15	1.75516e+09	0.000222122	0.0554828	0.945296	0.869544	2.07048	0.0267971	0.45656	0.419973		0.0554312	0.0267722		0.00022916	0.0554705	0.945232	0.869461	2.07026	0.026794	0.456577	0.419977		0.0554173	0.0267683
16	1.75516e+09	9.86248e-05	0.0557481	0.951371	0.874684	2.08378	0.0267534	0.456561	0.419759		0.0557252	0.0267424		0.000105662	0.0557359	0.951307	0.874601	2.08356	0.0267504	0.456579	0.419764		0.0557113	0.0267386
17	1.75516e+09	3.31399e-05	0.0555885	0.947373	0.871081	2.07347	0.0268095	0.456903	0.420108		0.0555808	0.0268057		4.01775e-05	0.0555763	0.947309	0.870998	2.07325	0.0268064	0.456921	0.420113		0.0555669	0.0268019
18	1.75516e+09	-6.32084e-05	0.0547361	0.936926	0.861009	2.05088	0.026689	0.45684	0.419823		0.0547508	0.0266962		-5.61708e-05	0.0547238	0.936862	0.860926	2.05066	0.0266859	0.456858	0.419828		0.0547369	0.0266923
19	1.75516e+09	0.00014166	0.0533412	0.916688	0.842746	2.0064	0.0265855	0.456881	0.420028		0.0533083	0.0265691		0.000148698	0.0533289	0.916624	0.842663	2.00618	0.0265823	0.4569	0.420033		0.0532944	0.0265651
20	1.75516e+09	6.77528e-05	0.0530429	0.908739	0.835885	1.98969	0.0266589	0.456724	0.420108		0.0530272	0.026651		7.47904e-05	0.0530306	0.908675	0.835803	1.98947	0.0266557	0.456743	0.420113		0.0530133	0.0266469
***	Cup	L3	L1	C	H1	H2	L1 | H2	C | H2	H1 | H2
***	Info	tbdgy	tbdgy	tbdgy	tbdgy	tbdgy	tbdgy - St	tbdgy - St	tbdgy - St
***	Mean	5.13867e-05	0.0554931	0.949663	0.873093	2.07881	0.0266944	0.45683	0.419997		0.0554811	0.0266886		5.84243e-05	0.0554808	0.949599	0.87301	2.07859	0.0266913	0.456848	0.420002		0.0554672	0.0266848
***	StdErr (%)	44.3255	0.369881	0.351706	0.350927	0.35162	0.0595716	0.00747174	0.00832087		0.00370262	0.000580047		0.389862	0.00369963	0.0035173	0.0035096	0.00351657	0.00059595	7.47213e-05	8.32205e-05		0.00370355	0.000580331
***	StdErr (abs)	2.27774e-05	0.000205258	0.00334002	0.00306392	0.00730951	1.59023e-05	3.41332e-05	3.49474e-05
***	StdDev (%)	198.23	1.65416	1.57288	1.56939	1.57249	0.266412	0.0334146	0.0372121
***	StdDev (abs)	0.000101864	0.000917943	0.014937	0.0137023	0.0326891	7.11172e-05	0.000152648	0.00015629
***	Valid Values	20 (20)	20 (20)	20 (20)	20 (20)	20 (20)	20 (20)	20 (20)	20 (20)

## Sheet: z_14_02
											M(202Hg)	g/mol	201.971	8e-07	K(204Hg)	1	0.990297			M	Meng Wang et al 2021 Chinese Phys. C 45 030003
											M(204Hg)	g/mol	203.973	5e-07	K(204Pb)	1	1.02106			x	De Laeter et al., 2003 IUPAC, Pure and Applied Chemistry 75, 683–800
											M(206Pb)	g/mol	205.974	1.2e-06	K(206Pb)	1	1.0096			R_cert	NIST SRM 981 certificate of analysis
											M(208Pb)	g/mol	207.977	1.2e-06	K(207Pb)	1	1.00456
											x(202Hg)	mol/mol	0.2986	0.0026
											x(204Hg)	mol/mol	0.0687	0.0015
											R204,cert	mol/mol	0.0272321
											R206,cert	mol/mol	0.461233
											R207,cert	mol/mol	0.421862
											g	1	-1.02006
														blank correction
Cycle	Time	202Hg	204Pb	206Pb	207Pb	208Pb	204Pb/208Pb (1)	206Pb/208Pb (2)	207Pb/208Pb (3)		204Pb_corr	204Pb_corr Pb/208Pb (1)		202Hg	204Pb	206Pb	207Pb	208Pb	204Pb/208Pb (1)	206Pb/208Pb (2)	207Pb/208Pb (3)		204Pb_corr_bl	204Pb_corr_bl Pb/208Pb (1)
1	1.75517e+09	-7.05186e-05	0.0567681	0.971171	0.892553	2.1251	0.0267132	0.457	0.420005		0.0567845	0.0267209		-6.34811e-05	0.0567558	0.971107	0.892471	2.12488	0.0267101	0.457018	0.42001		0.0567706	0.0267171
2	1.75517e+09	-0.000173404	0.0568162	0.973394	0.894224	2.12923	0.0266839	0.457157	0.419975		0.0568565	0.0267028		-0.000166366	0.056804	0.97333	0.894142	2.12901	0.0266809	0.457174	0.419979		0.0568426	0.026699
3	1.75517e+09	4.45386e-05	0.0570097	0.975289	0.896781	2.13461	0.0267073	0.456893	0.420115		0.0569994	0.0267025		5.15761e-05	0.0569975	0.975225	0.896698	2.13439	0.0267043	0.45691	0.420119		0.0569855	0.0266987
4	1.75517e+09	1.55392e-05	0.0572341	0.979688	0.900799	2.14458	0.0266878	0.456821	0.420035		0.0572305	0.0266861		2.25767e-05	0.0572218	0.979624	0.900716	2.14436	0.0266848	0.456838	0.42004		0.0572166	0.0266824
5	1.75517e+09	-7.89369e-05	0.0565669	0.971702	0.892857	2.12697	0.0265951	0.456849	0.41978		0.0565853	0.0266038		-7.18993e-05	0.0565547	0.971638	0.892774	2.12675	0.0265921	0.456866	0.419784		0.0565714	0.0266
6	1.75517e+09	-7.80016e-05	0.0562369	0.966118	0.888282	2.11613	0.0265753	0.456549	0.419767		0.056255	0.0265839		-7.0964e-05	0.0562246	0.966054	0.888199	2.11591	0.0265723	0.456566	0.419771		0.0562411	0.0265801
7	1.75517e+09	-3.12323e-05	0.0560695	0.96113	0.883498	2.10365	0.0266534	0.456886	0.419983		0.0560768	0.0266569		-2.41947e-05	0.0560572	0.961066	0.883415	2.10343	0.0266504	0.456904	0.419988		0.0560629	0.026653
8	1.75517e+09	-0.000150022	0.0563475	0.965283	0.887413	2.11318	0.0266648	0.456792	0.419942		0.0563824	0.0266813		-0.000142984	0.0563353	0.965219	0.88733	2.11296	0.0266618	0.45681	0.419947		0.0563685	0.0266775
9	1.75517e+09	-0.000169663	0.0569202	0.976269	0.897277	2.13551	0.0266541	0.45716	0.42017		0.0569596	0.0266726		-0.000162625	0.0569079	0.976205	0.897194	2.13529	0.0266511	0.457177	0.420174		0.0569457	0.0266688
10	1.75517e+09	-2.74907e-05	0.0566122	0.972436	0.893892	2.12866	0.0265952	0.45683	0.419931		0.0566186	0.0265982		-2.04531e-05	0.0565999	0.972373	0.893809	2.12844	0.0265922	0.456847	0.419936		0.0566047	0.0265944
11	1.75517e+09	-0.000222037	0.0569433	0.975089	0.896479	2.13521	0.0266687	0.45667	0.419854		0.0569949	0.0266928		-0.000214999	0.056931	0.975025	0.896396	2.13499	0.0266657	0.456687	0.419859		0.056981	0.0266891
12	1.75517e+09	-5.6488e-05	0.0568904	0.975192	0.896415	2.13477	0.0266493	0.456813	0.419911		0.0569035	0.0266555		-4.94504e-05	0.0568781	0.975129	0.896332	2.13456	0.0266463	0.45683	0.419915		0.0568896	0.0266517
13	1.75517e+09	-2.46844e-05	0.0551609	0.940551	0.864486	2.05947	0.026784	0.456695	0.419761		0.0551666	0.0267867		-1.76469e-05	0.0551486	0.940487	0.864403	2.05925	0.0267809	0.456713	0.419765		0.0551527	0.0267829
14	1.75517e+09	-8.26784e-05	0.0558858	0.959088	0.880944	2.09892	0.026626	0.456944	0.419713		0.055905	0.0266351		-7.56408e-05	0.0558735	0.959024	0.880861	2.0987	0.0266229	0.456961	0.419718		0.0558911	0.0266313
15	1.75517e+09	1.46037e-05	0.0564014	0.966156	0.88809	2.115	0.0266674	0.456812	0.419901		0.056398	0.0266658		2.16413e-05	0.0563892	0.966092	0.888007	2.11478	0.0266644	0.456829	0.419906		0.0563841	0.026662
16	1.75517e+09	-6.49064e-05	0.0559887	0.957096	0.880231	2.09532	0.0267208	0.456778	0.420093		0.0560038	0.026728		-5.78688e-05	0.0559764	0.957032	0.880148	2.0951	0.0267178	0.456795	0.420098		0.0559899	0.0267242
17	1.75517e+09	-0.00011448	0.0557377	0.954939	0.878281	2.09075	0.0266592	0.456744	0.420079		0.0557643	0.0266719		-0.000107442	0.0557254	0.954875	0.878199	2.09053	0.0266561	0.456762	0.420084		0.0557504	0.026668
18	1.75517e+09	1.08619e-05	0.0555281	0.949276	0.872768	2.07803	0.0267215	0.456816	0.419998		0.0555256	0.0267203		1.78995e-05	0.0555158	0.949212	0.872685	2.07781	0.0267184	0.456833	0.420003		0.0555117	0.0267164
19	1.75517e+09	3.70548e-05	0.0556781	0.957025	0.879619	2.09488	0.0265782	0.45684	0.41989		0.0556695	0.0265741		4.40923e-05	0.0556658	0.956961	0.879536	2.09466	0.0265751	0.456857	0.419894		0.0556556	0.0265702
20	1.75517e+09	-4.43279e-05	0.0544336	0.932617	0.857461	2.04133	0.0266658	0.456868	0.420051		0.0544439	0.0266709		-3.72904e-05	0.0544214	0.932553	0.857378	2.04111	0.0266627	0.456886	0.420056		0.05443	0.0266669
***	Cup	L3	L1	C	H1	H2	L1 | H2	C | H2	H1 | H2
***	Info	tbdgy	tbdgy	tbdgy	tbdgy	tbdgy	tbdgy - St	tbdgy - St	tbdgy - St
***	Mean	-6.33136e-05	0.0562615	0.963975	0.886118	2.11007	0.0266636	0.456846	0.419948		0.0562762	0.0266705		-5.62761e-05	0.0562492	0.963912	0.886035	2.10985	0.0266605	0.456863	0.419952		0.0562623	0.0266667
***	StdErr (%)	-26.0484	0.282006	0.292232	0.291171	0.29049	0.0442156	0.00707336	0.0067873		0.00283595	0.000442555		-0.293059	0.00282068	0.00292252	0.00291198	0.0029052	0.000442161	7.07123e-05	6.78767e-05		0.00283666	0.000442565
***	StdErr (abs)	1.64922e-05	0.000158661	0.00281705	0.00258012	0.00612952	1.17894e-05	3.23144e-05	2.85031e-05
***	StdDev (%)	-116.492	1.26117	1.3069	1.30216	1.29911	0.197738	0.031633	0.0303537
***	StdDev (abs)	7.37554e-05	0.000709553	0.0125982	0.0115386	0.0274121	5.2724e-05	0.000144514	0.00012747
***	Valid Values	20 (20)	20 (20)	20 (20)	20 (20)	20 (20)	20 (20)	20 (20)	20 (20)

## Sheet: z_14_03
											M(202Hg)	g/mol	201.971	8e-07	K(204Hg)	1	0.990219			M	Meng Wang et al 2021 Chinese Phys. C 45 030003
											M(204Hg)	g/mol	203.973	5e-07	K(204Pb)	1	1.01967			x	De Laeter et al., 2003 IUPAC, Pure and Applied Chemistry 75, 683–800
											M(206Pb)	g/mol	205.974	1.2e-06	K(206Pb)	1	1.00968			R_cert	NIST SRM 981 certificate of analysis
											M(208Pb)	g/mol	207.977	1.2e-06	K(207Pb)	1	1.00438
											x(202Hg)	mol/mol	0.2986	0.0026
											x(204Hg)	mol/mol	0.0687	0.0015
											R204,cert	mol/mol	0.0272321
											R206,cert	mol/mol	0.461233
											R207,cert	mol/mol	0.421862
											g	1	-1.02006
														blank correction
Cycle	Time	202Hg	204Pb	206Pb	207Pb	208Pb	204Pb/208Pb (1)	206Pb/208Pb (2)	207Pb/208Pb (3)		204Pb_corr	204Pb_corr Pb/208Pb (1)		202Hg	204Pb	206Pb	207Pb	208Pb	204Pb/208Pb (1)	206Pb/208Pb (2)	207Pb/208Pb (3)		204Pb_corr_bl	204Pb_corr_bl Pb/208Pb (1)
1	1.75517e+09	-0.000245341	0.059444	1.02365	0.940918	2.24104	0.0265252	0.456776	0.419857		0.059501	0.0265506		-0.000238303	0.0594317	1.02359	0.940836	2.24082	0.0265223	0.456792	0.419862		0.0594871	0.026547
2	1.75517e+09	7.64161e-05	0.059197	1.01296	0.931309	2.21767	0.0266933	0.456766	0.419948		0.0591792	0.0266853		8.34536e-05	0.0591847	1.0129	0.931226	2.21746	0.0266904	0.456783	0.419953		0.0591653	0.0266816
3	1.75517e+09	2.51494e-06	0.0598089	1.02383	0.940898	2.24059	0.0266933	0.456946	0.419932		0.0598083	0.0266931		9.55251e-06	0.0597966	1.02377	0.940815	2.24037	0.0266905	0.456962	0.419936		0.0597944	0.0266895
4	1.75517e+09	1.28046e-05	0.0594401	1.01695	0.93453	2.22555	0.0267081	0.456942	0.41991		0.0594372	0.0267068		1.98422e-05	0.0594279	1.01688	0.934448	2.22533	0.0267052	0.456958	0.419915		0.0594233	0.0267032
5	1.75517e+09	8.10935e-05	0.0599354	1.02291	0.940493	2.23942	0.0267638	0.456775	0.419971		0.0599165	0.0267554		8.81311e-05	0.0599231	1.02285	0.94041	2.2392	0.0267609	0.456791	0.419976		0.0599026	0.0267518
6	1.75517e+09	-2.92889e-05	0.0591574	1.01171	0.930953	2.21584	0.0266975	0.45658	0.420135		0.0591642	0.0267005		-2.22513e-05	0.0591451	1.01165	0.93087	2.21562	0.0266946	0.456596	0.420139		0.0591503	0.0266969
7	1.75517e+09	0.000219557	0.0587117	1.00688	0.925705	2.20382	0.0266409	0.456878	0.420046		0.0586607	0.0266178		0.000226594	0.0586995	1.00681	0.925622	2.2036	0.026638	0.456894	0.42005		0.0586468	0.0266141
8	1.75517e+09	3.89971e-05	0.0590426	1.01229	0.930966	2.21609	0.0266427	0.45679	0.420094		0.0590335	0.0266386		4.60346e-05	0.0590303	1.01222	0.930883	2.21587	0.0266398	0.456807	0.420099		0.0590196	0.026635
9	1.75517e+09	8.7642e-05	0.0584986	1.00134	0.921271	2.19245	0.0266819	0.456722	0.420202		0.0584783	0.0266726		9.46796e-05	0.0584863	1.00127	0.921188	2.19223	0.026679	0.456738	0.420207		0.0584643	0.0266689
10	1.75517e+09	8.0158e-05	0.0593012	1.01061	0.929145	2.21134	0.0268169	0.457014	0.420173		0.0592826	0.0268085		8.71956e-05	0.0592889	1.01055	0.929062	2.21112	0.026814	0.457031	0.420178		0.0592686	0.0268048
11	1.75517e+09	0.000156872	0.0585545	1.00198	0.92165	2.19454	0.0266819	0.456578	0.419973		0.0585181	0.0266653		0.000163909	0.0585423	1.00192	0.921567	2.19432	0.026679	0.456595	0.419977		0.0585042	0.0266616
12	1.75517e+09	-4.98673e-05	0.0573239	0.979166	0.900312	2.14357	0.0267422	0.456792	0.420005		0.0573355	0.0267476		-4.28297e-05	0.0573116	0.979103	0.900229	2.14335	0.0267393	0.456809	0.42001		0.0573216	0.0267439
13	1.75517e+09	9.1384e-05	0.0585488	1.00439	0.923278	2.1991	0.026624	0.456726	0.419843		0.0585275	0.0266143		9.84216e-05	0.0585365	1.00432	0.923195	2.19888	0.026621	0.456743	0.419848		0.0585136	0.0266106
14	1.75517e+09	0.000174648	0.056855	0.972731	0.894954	2.12983	0.0266947	0.456719	0.420201		0.0568144	0.0266756		0.000181685	0.0568427	0.972667	0.894872	2.12961	0.0266917	0.456736	0.420205		0.0568005	0.0266718
15	1.75517e+09	-0.000293034	0.0591786	1.00649	0.925512	2.20291	0.0268638	0.456891	0.420131		0.0592467	0.0268947		-0.000285997	0.0591664	1.00643	0.925429	2.20269	0.0268609	0.456907	0.420135		0.0592328	0.0268911
16	1.75517e+09	0.00011103	0.0589934	1.00705	0.926119	2.20536	0.02675	0.456638	0.419939		0.0589676	0.0267383		0.000118067	0.0589811	1.00699	0.926036	2.20514	0.0267471	0.456655	0.419944		0.0589537	0.0267346
17	1.75517e+09	0.000176519	0.0583588	0.996536	0.916423	2.18077	0.0267606	0.456965	0.420229		0.0583178	0.0267418		0.000183556	0.0583465	0.996472	0.91634	2.18055	0.0267577	0.456982	0.420233		0.0583039	0.0267381
18	1.75517e+09	2.96426e-05	0.058354	0.995212	0.914951	2.17887	0.0267818	0.456756	0.41992		0.0583471	0.0267786		3.66801e-05	0.0583417	0.995149	0.914868	2.17865	0.0267789	0.456773	0.419925		0.0583332	0.0267749
19	1.75517e+09	-3.77074e-05	0.0579684	0.993829	0.912773	2.17381	0.0266667	0.457183	0.419895		0.0579772	0.0266708		-3.06698e-05	0.0579562	0.993765	0.91269	2.17359	0.0266638	0.4572	0.4199		0.0579633	0.0266671
20	1.75517e+09	8.12748e-06	0.056983	0.971821	0.89363	2.12757	0.0267831	0.456775	0.420024		0.0569811	0.0267822		1.51651e-05	0.0569707	0.971757	0.893547	2.12735	0.0267801	0.456792	0.420028		0.0569672	0.0267785
***	Cup	L3	L1	C	H1	H2	L1 | H2	C | H2	H1 | H2
***	Info	tbdgy	tbdgy	tbdgy	tbdgy	tbdgy	tbdgy - St	tbdgy - St	tbdgy - St
***	Mean	3.46083e-05	0.0586828	1.00362	0.922789	2.19701	0.0267106	0.456811	0.420022		0.0586747	0.0267069		4.16459e-05	0.0586705	1.00355	0.922707	2.19679	0.0267077	0.456827	0.420026		0.0586608	0.0267033
***	StdErr (%)	82.6868	0.329452	0.341176	0.338957	0.340831	0.0633906	0.00728043	0.00650883		0.00332064	0.000648901		0.687139	0.00329521	0.00341197	0.00338987	0.00340865	0.000633937	7.28042e-05	6.51047e-05		0.00332143	0.000648947
***	StdErr (abs)	2.86165e-05	0.000193332	0.00342409	0.00312786	0.00748808	1.6932e-05	3.32578e-05	2.73385e-05
***	StdDev (%)	369.787	1.47335	1.52578	1.51586	1.52424	0.283491	0.0325591	0.0291084
***	StdDev (abs)	0.000127977	0.000864605	0.015313	0.0139882	0.0334877	7.57222e-05	0.000148733	0.000122261
***	Valid Values	20 (20)	20 (20)	20 (20)	20 (20)	20 (20)	20 (20)	20 (20)	20 (20)

## Sheet: z_14_04
											M(202Hg)	g/mol	201.971	8e-07	K(204Hg)	1	0.990247			M	Meng Wang et al 2021 Chinese Phys. C 45 030003
											M(204Hg)	g/mol	203.973	5e-07	K(204Pb)	1	1.02089			x	De Laeter et al., 2003 IUPAC, Pure and Applied Chemistry 75, 683–800
											M(206Pb)	g/mol	205.974	1.2e-06	K(206Pb)	1	1.00965			R_cert	NIST SRM 981 certificate of analysis
											M(208Pb)	g/mol	207.977	1.2e-06	K(207Pb)	1	1.00453
											x(202Hg)	mol/mol	0.2986	0.0026
											x(204Hg)	mol/mol	0.0687	0.0015
											R204,cert	mol/mol	0.0272321
											R206,cert	mol/mol	0.461233
											R207,cert	mol/mol	0.421862
											g	1	-1.02006
														blank correction
Cycle	Time	202Hg	204Pb	206Pb	207Pb	208Pb	204Pb/208Pb (1)	206Pb/208Pb (2)	207Pb/208Pb (3)		204Pb_corr	204Pb_corr Pb/208Pb (1)		202Hg	204Pb	206Pb	207Pb	208Pb	204Pb/208Pb (1)	206Pb/208Pb (2)	207Pb/208Pb (3)		204Pb_corr_bl	204Pb_corr_bl Pb/208Pb (1)
1	1.75517e+09	-0.000174682	0.0598024	1.02515	0.942492	2.24444	0.0266447	0.456752	0.419923		0.059843	0.0266627		-0.000167644	0.0597901	1.02509	0.94241	2.24422	0.0266418	0.456768	0.419927		0.0598291	0.0266592
2	1.75517e+09	-2.40932e-05	0.0584526	1.00138	0.920778	2.19204	0.0266659	0.456825	0.420056		0.0584582	0.0266684		-1.70556e-05	0.0584403	1.00131	0.920695	2.19182	0.0266629	0.456841	0.42006		0.0584443	0.0266648
3	1.75517e+09	4.51291e-05	0.0580227	0.992074	0.911986	2.17039	0.0267338	0.457096	0.420195		0.0580122	0.026729		5.21667e-05	0.0580104	0.99201	0.911904	2.17017	0.0267308	0.457112	0.4202		0.0579983	0.0267253
4	1.75517e+09	4.70001e-05	0.0583716	1.00198	0.920916	2.19339	0.0266125	0.456817	0.41986		0.0583607	0.0266076		5.40376e-05	0.0583593	1.00191	0.920834	2.19317	0.0266096	0.456834	0.419865		0.0583468	0.0266039
5	1.75517e+09	3.01617e-05	0.0583697	1.00143	0.920273	2.19233	0.0266245	0.456786	0.419769		0.0583627	0.0266213		3.71993e-05	0.0583574	1.00136	0.92019	2.19211	0.0266216	0.456803	0.419774		0.0583488	0.0266176
6	1.75517e+09	0.000106872	0.0576237	0.987244	0.906937	2.15962	0.0266823	0.457137	0.419951		0.0575989	0.0266708		0.00011391	0.0576115	0.98718	0.906854	2.1594	0.0266793	0.457154	0.419956		0.057585	0.0266671
7	1.75517e+09	3.4839e-05	0.0598951	1.0243	0.94166	2.24211	0.0267138	0.456846	0.419989		0.059887	0.0267102		4.18766e-05	0.0598828	1.02423	0.941577	2.24189	0.0267109	0.456863	0.419993		0.0598731	0.0267066
8	1.75517e+09	-1.84807e-05	0.0598091	1.02139	0.938975	2.23598	0.0267485	0.456796	0.419938		0.0598134	0.0267504		-1.14432e-05	0.0597969	1.02133	0.938892	2.23576	0.0267456	0.456813	0.419942		0.0597995	0.0267468
9	1.75517e+09	-8.95693e-05	0.0603229	1.03075	0.947469	2.25547	0.0267452	0.457003	0.420077		0.0603437	0.0267544		-8.25317e-05	0.0603106	1.03069	0.947386	2.25525	0.0267424	0.457019	0.420081		0.0603298	0.0267509
10	1.75517e+09	1.23882e-05	0.0602273	1.03163	0.947688	2.25827	0.0266696	0.456821	0.419652		0.0602244	0.0266684		1.94258e-05	0.060215	1.03156	0.947605	2.25805	0.0266668	0.456838	0.419656		0.0602105	0.0266648
11	1.75517e+09	0.000104065	0.0606156	1.03473	0.951261	2.2646	0.0267666	0.456914	0.420058		0.0605915	0.026756		0.000111103	0.0606034	1.03466	0.951178	2.26438	0.0267638	0.45693	0.420062		0.0605776	0.0267524
12	1.75517e+09	0.000127454	0.0602765	1.03336	0.950157	2.2633	0.0266321	0.456573	0.41981		0.0602469	0.026619		0.000134491	0.0602643	1.0333	0.950074	2.26308	0.0266293	0.456589	0.419814		0.060233	0.0266155
13	1.75517e+09	0.000126518	0.059619	1.02224	0.940021	2.23904	0.026627	0.456551	0.419832		0.0595896	0.0266139		0.000133556	0.0596067	1.02217	0.939938	2.23882	0.0266242	0.456567	0.419836		0.0595757	0.0266103
14	1.75517e+09	-5.12195e-05	0.0596441	1.02481	0.942054	2.24339	0.0265866	0.456815	0.419925		0.059656	0.0265919		-4.41819e-05	0.0596318	1.02475	0.941971	2.24317	0.0265838	0.456831	0.419929		0.0596421	0.0265883
15	1.75517e+09	-0.000213962	0.0584266	0.999122	0.918697	2.18725	0.0267124	0.456795	0.420025		0.0584763	0.0267351		-0.000206924	0.0584143	0.999058	0.918615	2.18703	0.0267095	0.456811	0.420029		0.0584624	0.0267314
16	1.75517e+09	-0.000213962	0.0576941	0.990949	0.911024	2.16992	0.0265881	0.456675	0.419842		0.0577438	0.026611		-0.000206924	0.0576818	0.990885	0.910941	2.1697	0.0265852	0.456692	0.419847		0.0577299	0.0266073
17	1.75517e+09	-1.66099e-05	0.0580207	0.990805	0.911094	2.16954	0.0267433	0.456688	0.419947		0.0580246	0.0267451		-9.57235e-06	0.0580085	0.990741	0.911011	2.16932	0.0267404	0.456705	0.419952		0.0580107	0.0267414
18	1.75517e+09	0.000139616	0.0568716	0.973644	0.895441	2.13097	0.0266882	0.456902	0.420204		0.0568392	0.026673		0.000146654	0.0568593	0.97358	0.895358	2.13075	0.0266852	0.45692	0.420209		0.0568253	0.0266692
19	1.75517e+09	5.07419e-05	0.0584063	1.00138	0.921265	2.193	0.0266331	0.456625	0.420094		0.0583945	0.0266277		5.77795e-05	0.058394	1.00131	0.921182	2.19278	0.0266302	0.456642	0.420098		0.0583806	0.0266241
20	1.75517e+09	2.92263e-05	0.0578135	0.990133	0.910031	2.16639	0.0266865	0.457042	0.420067		0.0578068	0.0266834		3.62638e-05	0.0578013	0.990069	0.909948	2.16617	0.0266836	0.457059	0.420072		0.0577928	0.0266797
***	Cup	L3	L1	C	H1	H2	L1 | H2	C | H2	H1 | H2
***	Info	tbdgy	tbdgy	tbdgy	tbdgy	tbdgy	tbdgy - St	tbdgy - St	tbdgy - St
***	Mean	2.57169e-06	0.0589143	1.00892	0.927511	2.20857	0.0266752	0.456823	0.419961		0.0589137	0.026675		9.60927e-06	0.058902	1.00886	0.927428	2.20835	0.0266723	0.45684	0.419965		0.0588998	0.0266713
***	StdErr (%)	930.786	0.421849	0.41486	0.414035	0.417083	0.046648	0.00787673	0.00752137		0.00422029	0.000467402		2.49103	0.00421937	0.00414886	0.00414072	0.00417125	0.000466595	7.88176e-05	7.52385e-05		0.00422128	0.000467538
***	StdErr (abs)	2.3937e-05	0.000248529	0.00418562	0.00384022	0.00921158	1.24435e-05	3.59827e-05	3.15868e-05
***	StdDev (%)	4162.6	1.88656	1.85531	1.85162	1.86525	0.208616	0.0352258	0.0336366
***	StdDev (abs)	0.000107049	0.00111146	0.0187187	0.017174	0.0411955	5.56489e-05	0.000160919	0.000141261
***	Valid Values	20 (20)	20 (20)	20 (20)	20 (20)	20 (20)	20 (20)	20 (20)	20 (20)

## Sheet: z_14c_01
											M(202Hg)	g/mol	201.971	8e-07	K(204Hg)	1	0.990707			M	Meng Wang et al 2021 Chinese Phys. C 45 030003
											M(204Hg)	g/mol	203.973	5e-07	K(204Pb)	1	1.01998			x	De Laeter et al., 2003 IUPAC, Pure and Applied Chemistry 75, 683–800
											M(206Pb)	g/mol	205.974	1.2e-06	K(206Pb)	1	1.0092			R_cert	NIST SRM 981 certificate of analysis
											M(208Pb)	g/mol	207.977	1.2e-06	K(207Pb)	1	1.00501
											x(202Hg)	mol/mol	0.2986	0.0026
											x(204Hg)	mol/mol	0.0687	0.0015
											R204,cert	mol/mol	0.0272321
											R206,cert	mol/mol	0.461233
											R207,cert	mol/mol	0.421862
											g	1	-1.02006
														blank correction
Cycle	Time	202Hg	204Pb	206Pb	207Pb	208Pb	204Pb/208Pb (1)	206Pb/208Pb (2)	207Pb/208Pb (3)		204Pb_corr	204Pb_corr Pb/208Pb (1)		202Hg	204Pb	206Pb	207Pb	208Pb	204Pb/208Pb (1)	206Pb/208Pb (2)	207Pb/208Pb (3)		204Pb_corr_bl	204Pb_corr_bl Pb/208Pb (1)
1	1.75516e+09	0.000221482	0.0381129	0.65092	0.598251	1.42399	0.0267649	0.457109	0.420123		0.0380615	0.0267287		0.000228519	0.0381007	0.650856	0.598169	1.42377	0.0267604	0.457135	0.42013		0.0380476	0.0267231
2	1.75516e+09	0.000116696	0.0387986	0.663772	0.610021	1.45329	0.026697	0.456737	0.419752		0.0387715	0.0266784		0.000123733	0.0387863	0.663708	0.609939	1.45307	0.0266926	0.456762	0.419758		0.0387576	0.0266729
3	1.75516e+09	-6.1976e-05	0.0388376	0.666443	0.611854	1.45752	0.0266463	0.457243	0.419789		0.038852	0.0266562		-5.49384e-05	0.0388254	0.666379	0.611771	1.4573	0.0266419	0.457268	0.419796		0.0388381	0.0266507
4	1.75516e+09	-0.000156444	0.0383529	0.65709	0.60365	1.43704	0.0266889	0.457253	0.420066		0.0383892	0.0267141		-0.000149406	0.0383406	0.657026	0.603567	1.43682	0.0266844	0.457279	0.420073		0.0383753	0.0267085
5	1.75516e+09	-0.000126514	0.038231	0.65413	0.600179	1.43116	0.0267133	0.457063	0.419366		0.0382604	0.0267338		-0.000119477	0.0382187	0.654066	0.600097	1.43094	0.0267088	0.457089	0.419372		0.0382465	0.0267282
6	1.75516e+09	-6.38467e-05	0.0390568	0.667701	0.613448	1.46232	0.0267088	0.456604	0.419504		0.0390716	0.026719		-5.68091e-05	0.0390445	0.667637	0.613365	1.4621	0.0267044	0.456629	0.41951		0.0390577	0.0267135
7	1.75516e+09	7.36619e-05	0.0392197	0.671003	0.616285	1.46802	0.026716	0.457079	0.419806		0.0392026	0.0267044		8.06994e-05	0.0392075	0.670939	0.616202	1.4678	0.0267117	0.457104	0.419813		0.0391887	0.0266989
8	1.75516e+09	0.000134471	0.0393122	0.67231	0.616988	1.47043	0.0267352	0.457221	0.419598		0.039281	0.026714		0.000141509	0.0392999	0.672246	0.616906	1.47021	0.0267309	0.457246	0.419604		0.0392671	0.0267085
9	1.75516e+09	0.000179379	0.0385805	0.66544	0.611196	1.45571	0.0265028	0.457122	0.41986		0.0385388	0.0264741		0.000186416	0.0385682	0.665376	0.611113	1.4555	0.0264983	0.457148	0.419866		0.0385249	0.0264686
10	1.75516e+09	0.000158796	0.0392912	0.670202	0.615913	1.46734	0.0267771	0.456745	0.419747		0.0392543	0.026752		0.000165833	0.039279	0.670138	0.615831	1.46712	0.0267727	0.45677	0.419753		0.0392404	0.0267465
11	1.75516e+09	-1.05293e-05	0.039134	0.667702	0.613035	1.46071	0.0267911	0.457108	0.419683		0.0391364	0.0267927		-3.49176e-06	0.0391217	0.667638	0.612952	1.46049	0.0267867	0.457133	0.419689		0.0391225	0.0267872
12	1.75516e+09	4.93392e-05	0.0386233	0.665162	0.610641	1.45543	0.0265374	0.45702	0.41956		0.0386119	0.0265295		5.63768e-05	0.0386111	0.665098	0.610559	1.45521	0.0265329	0.457045	0.419567		0.038598	0.0265239
13	1.75516e+09	0.000222417	0.0387005	0.661322	0.607458	1.44643	0.0267558	0.457208	0.419969		0.0386488	0.0267201		0.000229455	0.0386882	0.661258	0.607375	1.44621	0.0267514	0.457234	0.419976		0.0386349	0.0267145
14	1.75516e+09	0.000126051	0.0390596	0.664941	0.610988	1.45553	0.0268354	0.456839	0.419771		0.0390304	0.0268153		0.000133089	0.0390474	0.664877	0.610905	1.45531	0.026831	0.456864	0.419778		0.0390165	0.0268098
15	1.75516e+09	-3.67207e-05	0.03849	0.657617	0.603867	1.43901	0.0267476	0.456993	0.41964		0.0384985	0.0267535		-2.96831e-05	0.0384777	0.657554	0.603784	1.43879	0.0267431	0.457018	0.419647		0.0384846	0.0267479
16	1.75516e+09	-5.07515e-05	0.0384605	0.659549	0.606001	1.44311	0.0266511	0.457033	0.419927		0.0384723	0.0266593		-4.37139e-05	0.0384482	0.659485	0.605918	1.44289	0.0266467	0.457059	0.419934		0.0384583	0.0266537
17	1.75516e+09	-0.000109679	0.0384005	0.657407	0.603682	1.43871	0.0266909	0.456941	0.419599		0.0384259	0.0267086		-0.000102641	0.0383882	0.657343	0.603599	1.43849	0.0266864	0.456967	0.419605		0.038412	0.026703
18	1.75516e+09	0.000200898	0.0382748	0.654583	0.601316	1.43159	0.0267359	0.457243	0.420034		0.0382281	0.0267033		0.000207935	0.0382625	0.654519	0.601234	1.43137	0.0267314	0.457268	0.420041		0.0382142	0.0266977
19	1.75516e+09	8.67589e-05	0.0377855	0.647077	0.594052	1.41562	0.0266919	0.4571	0.419642		0.0377654	0.0266777		9.37965e-05	0.0377732	0.647013	0.593969	1.4154	0.0266874	0.457125	0.419649		0.0377515	0.026672
20	1.75516e+09	1.37918e-05	0.0376047	0.642611	0.590306	1.40629	0.0267404	0.456956	0.419763		0.0376015	0.0267382		2.08294e-05	0.0375924	0.642547	0.590224	1.40607	0.0267359	0.456982	0.419769		0.0375876	0.0267324
***	Cup	L3	L1	C	H1	H2	L1 | H2	C | H2	H1 | H2
***	Info	tbdgy	tbdgy	tbdgy	tbdgy	tbdgy	tbdgy - St	tbdgy - St	tbdgy - St
***	Mean	4.8364e-05	0.0386163	0.660849	0.606957	1.44596	0.0267064	0.457031	0.41976		0.0386051	0.0266986		5.54016e-05	0.0386041	0.660785	0.606874	1.44574	0.026702	0.457056	0.419767		0.0385912	0.0266931
***	StdErr (%)	55.8371	0.27996	0.275076	0.274884	0.276715	0.0656789	0.00896334	0.0104648		0.00278345	0.000656449		0.487442	0.00280049	0.00275102	0.00274921	0.00276757	0.000656962	8.96724e-05	0.000104671		0.00278445	0.000656627
***	StdErr (abs)	2.70051e-05	0.00010811	0.00181783	0.00166843	0.0040012	1.75405e-05	4.09653e-05	4.3927e-05
***	StdDev (%)	249.711	1.25202	1.23018	1.22932	1.23751	0.293725	0.0400853	0.0468
***	StdDev (abs)	0.00012077	0.000483484	0.0081296	0.00746143	0.0178939	7.84433e-05	0.000183202	0.000196448
***	Valid Values	20 (20)	20 (20)	20 (20)	20 (20)	20 (20)	20 (20)	20 (20)	20 (20)

## Sheet: z_14c_02
											M(202Hg)	g/mol	201.971	8e-07	K(204Hg)	1	0.990714			M	Meng Wang et al 2021 Chinese Phys. C 45 030003
											M(204Hg)	g/mol	203.973	5e-07	K(204Pb)	1	1.02089			x	De Laeter et al., 2003 IUPAC, Pure and Applied Chemistry 75, 683–800
											M(206Pb)	g/mol	205.974	1.2e-06	K(206Pb)	1	1.00919			R_cert	NIST SRM 981 certificate of analysis
											M(208Pb)	g/mol	207.977	1.2e-06	K(207Pb)	1	1.00497
											x(202Hg)	mol/mol	0.2986	0.0026
											x(204Hg)	mol/mol	0.0687	0.0015
											R204,cert	mol/mol	0.0272321
											R206,cert	mol/mol	0.461233
											R207,cert	mol/mol	0.421862
											g	1	-1.02006
														blank correction
Cycle	Time	202Hg	204Pb	206Pb	207Pb	208Pb	204Pb/208Pb (1)	206Pb/208Pb (2)	207Pb/208Pb (3)		204Pb_corr	204Pb_corr Pb/208Pb (1)		202Hg	204Pb	206Pb	207Pb	208Pb	204Pb/208Pb (1)	206Pb/208Pb (2)	207Pb/208Pb (3)		204Pb_corr_bl	204Pb_corr_bl Pb/208Pb (1)
1	1.75517e+09	-0.000177866	0.0391327	0.671738	0.617195	1.47077	0.0266069	0.456725	0.419641		0.039174	0.026635		-0.000170829	0.0391204	0.671674	0.617113	1.47055	0.0266026	0.45675	0.419647		0.0391601	0.0266295
2	1.75517e+09	-0.000223694	0.0395511	0.674637	0.619471	1.47663	0.0267848	0.456877	0.419517		0.0396031	0.02682		-0.000216656	0.0395389	0.674573	0.619388	1.47641	0.0267805	0.456901	0.419524		0.0395892	0.0268145
3	1.75517e+09	-0.000176931	0.039187	0.672362	0.617365	1.47085	0.0266424	0.457124	0.419733		0.0392281	0.0266703		-0.000169893	0.0391748	0.672298	0.617282	1.47063	0.026638	0.457149	0.419739		0.0392142	0.0266649
4	1.75517e+09	-0.000105847	0.0390689	0.675197	0.619984	1.4767	0.0264568	0.457232	0.419843		0.0390935	0.0264735		-9.88097e-05	0.0390566	0.675133	0.619901	1.47648	0.0264524	0.457257	0.41985		0.0390796	0.026468
5	1.75517e+09	-0.000187219	0.0388259	0.667479	0.612838	1.45991	0.0265947	0.457205	0.419778		0.0388694	0.0266245		-0.000180181	0.0388137	0.667415	0.612755	1.45969	0.0265903	0.45723	0.419784		0.0388555	0.026619
6	1.75517e+09	0.00013363	0.0390994	0.668739	0.614149	1.46313	0.0267232	0.457061	0.419751		0.0390683	0.0267019		0.000140667	0.0390871	0.668675	0.614066	1.46291	0.0267188	0.457086	0.419757		0.0390544	0.0266965
7	1.75517e+09	6.06579e-05	0.0385221	0.664352	0.6096	1.45289	0.0265141	0.457262	0.419578		0.038508	0.0265044		6.76954e-05	0.0385098	0.664288	0.609518	1.45267	0.0265097	0.457288	0.419584		0.0384941	0.0264988
8	1.75517e+09	-9.36878e-05	0.0383421	0.658573	0.604783	1.44066	0.0266142	0.457132	0.419795		0.0383639	0.0266293		-8.66502e-05	0.0383298	0.658509	0.604701	1.44044	0.0266098	0.457157	0.419802		0.0383499	0.0266237
9	1.75517e+09	0.000183216	0.0379156	0.648131	0.595065	1.41789	0.0267408	0.457108	0.419682		0.0378731	0.0267108		0.000190254	0.0379033	0.648067	0.594982	1.41767	0.0267363	0.457134	0.419689		0.0378592	0.0267051
10	1.75517e+09	5.69159e-05	0.0378709	0.651482	0.598474	1.42594	0.0265585	0.456878	0.419703		0.0378577	0.0265492		6.39534e-05	0.0378586	0.651418	0.598391	1.42572	0.0265539	0.456903	0.41971		0.0378438	0.0265435
11	1.75517e+09	-0.000235851	0.0391575	0.671904	0.616941	1.46973	0.0266426	0.457161	0.419764		0.0392123	0.0266799		-0.000228814	0.0391452	0.67184	0.616858	1.46951	0.0266382	0.457186	0.419771		0.0391984	0.0266744
12	1.75517e+09	-0.000100235	0.0392271	0.671079	0.616349	1.46806	0.0267204	0.45712	0.419839		0.0392503	0.0267362		-9.31976e-05	0.0392148	0.671015	0.616266	1.46784	0.026716	0.457145	0.419846		0.0392364	0.0267307
13	1.75517e+09	0.000102756	0.0391823	0.667456	0.612708	1.46024	0.0268328	0.457087	0.419595		0.0391584	0.0268165		0.000109794	0.03917	0.667392	0.612625	1.46002	0.0268285	0.457112	0.419601		0.0391445	0.026811
14	1.75517e+09	7.18839e-05	0.0386554	0.661469	0.607581	1.44726	0.0267094	0.457049	0.419815		0.0386387	0.0266979		7.89215e-05	0.0386431	0.661405	0.607498	1.44704	0.026705	0.457075	0.419822		0.0386248	0.0266923
15	1.75517e+09	0.000152341	0.0385773	0.662348	0.608561	1.44933	0.0266174	0.457003	0.419892		0.0385419	0.026593		0.000159379	0.038565	0.662284	0.608478	1.44911	0.026613	0.457028	0.419898		0.038528	0.0265874
16	1.75517e+09	0.00010837	0.0383573	0.657618	0.604429	1.43977	0.0266412	0.456751	0.419808		0.0383322	0.0266238		0.000115407	0.0383451	0.657554	0.604346	1.43955	0.0266368	0.456777	0.419815		0.0383183	0.0266182
17	1.75517e+09	0.000267425	0.0385192	0.656981	0.603407	1.43758	0.0267945	0.457005	0.419738		0.0384571	0.0267513		0.000274463	0.0385069	0.656917	0.603324	1.43736	0.0267901	0.457031	0.419745		0.0384432	0.0267457
18	1.75517e+09	-9.74292e-05	0.0372115	0.636838	0.585348	1.39367	0.0267004	0.45695	0.420005		0.0372342	0.0267166		-9.03916e-05	0.0371993	0.636774	0.585265	1.39345	0.0266958	0.456977	0.420012		0.0372203	0.0267109
19	1.75517e+09	4.28835e-05	0.0377043	0.641729	0.589776	1.40394	0.026856	0.45709	0.420085		0.0376944	0.0268489		4.99211e-05	0.0376921	0.641665	0.589693	1.40372	0.0268515	0.457116	0.420092		0.0376805	0.0268432
20	1.75517e+09	4.66254e-05	0.037358	0.638741	0.587129	1.39812	0.0267202	0.456858	0.419942		0.0373472	0.0267125		5.3663e-05	0.0373458	0.638677	0.587046	1.3979	0.0267157	0.456884	0.419949		0.0373333	0.0267067
***	Cup	L3	L1	C	H1	H2	L1 | H2	C | H2	H1 | H2
***	Info	tbdgy	tbdgy	tbdgy	tbdgy	tbdgy	tbdgy - St	tbdgy - St	tbdgy - St
***	Mean	-8.60278e-06	0.0385733	0.660943	0.607058	1.44615	0.0266736	0.457034	0.419775		0.0385753	0.0266748		-1.56521e-06	0.038561	0.660879	0.606975	1.44593	0.0266691	0.457059	0.419782		0.0385614	0.0266692
***	StdErr (%)	-389.314	0.387645	0.406977	0.400736	0.405094	0.0870703	0.00743319	0.00749631		0.00395814	0.000833192		-21.3977	0.00387769	0.00407016	0.00400791	0.00405156	0.000870769	7.42825e-05	7.50122e-05		0.00395957	0.000833301
***	StdErr (abs)	3.34919e-05	0.000149528	0.00268988	0.0024327	0.00585829	2.32248e-05	3.39722e-05	3.14676e-05
***	StdDev (%)	-1741.07	1.7336	1.82006	1.79215	1.81164	0.38939	0.0332422	0.0335245
***	StdDev (abs)	0.00014978	0.000668708	0.0120295	0.0108794	0.0261991	0.000103864	0.000151928	0.000140728
***	Valid Values	20 (20)	20 (20)	20 (20)	20 (20)	20 (20)	20 (20)	20 (20)	20 (20)

## Sheet: z_14c_03
											M(202Hg)	g/mol	201.971	8e-07	K(204Hg)	1	0.990822			M	Meng Wang et al 2021 Chinese Phys. C 45 030003
											M(204Hg)	g/mol	203.973	5e-07	K(204Pb)	1	1.02109			x	De Laeter et al., 2003 IUPAC, Pure and Applied Chemistry 75, 683–800
											M(206Pb)	g/mol	205.974	1.2e-06	K(206Pb)	1	1.00908			R_cert	NIST SRM 981 certificate of analysis
											M(208Pb)	g/mol	207.977	1.2e-06	K(207Pb)	1	1.00483
											x(202Hg)	mol/mol	0.2986	0.0026
											x(204Hg)	mol/mol	0.0687	0.0015
											R204,cert	mol/mol	0.0272321
											R206,cert	mol/mol	0.461233
											R207,cert	mol/mol	0.421862
											g	1	-1.02006
														blank correction
Cycle	Time	202Hg	204Pb	206Pb	207Pb	208Pb	204Pb/208Pb (1)	206Pb/208Pb (2)	207Pb/208Pb (3)		204Pb_corr	204Pb_corr Pb/208Pb (1)		202Hg	204Pb	206Pb	207Pb	208Pb	204Pb/208Pb (1)	206Pb/208Pb (2)	207Pb/208Pb (3)		204Pb_corr_bl	204Pb_corr_bl Pb/208Pb (1)
1	1.75517e+09	-1.79422e-05	0.0409502	0.700267	0.642715	1.53066	0.0267534	0.457494	0.419895		0.0409544	0.0267561		-1.09046e-05	0.040938	0.700203	0.642632	1.53044	0.0267492	0.457518	0.419901		0.0409405	0.0267508
2	1.75517e+09	3.44417e-05	0.0407899	0.700319	0.643573	1.53207	0.026624	0.457106	0.420067		0.0407819	0.0266188		4.14792e-05	0.0407776	0.700255	0.64349	1.53185	0.0266198	0.45713	0.420074		0.040768	0.0266136
3	1.75517e+09	8.21508e-05	0.0410448	0.698737	0.64217	1.52943	0.0268367	0.456862	0.419876		0.0410257	0.0268242		8.91884e-05	0.0410325	0.698673	0.642088	1.52921	0.0268325	0.456886	0.419882		0.0410118	0.026819
4	1.75517e+09	2.13454e-05	0.0407612	0.699487	0.642618	1.52964	0.0266476	0.457288	0.42011		0.0407563	0.0266443		2.8383e-05	0.040749	0.699423	0.642535	1.52942	0.0266434	0.457312	0.420116		0.0407424	0.0266391
5	1.75517e+09	0.000164478	0.0409073	0.697462	0.640836	1.52629	0.0268018	0.456965	0.419864		0.0408691	0.0267767		0.000171515	0.040895	0.697398	0.640753	1.52607	0.0267976	0.456989	0.419871		0.0408552	0.0267715
6	1.75517e+09	-7.7806e-05	0.0396909	0.681941	0.626292	1.49271	0.0265899	0.456848	0.419568		0.039709	0.026602		-7.07685e-05	0.0396786	0.681877	0.62621	1.49249	0.0265856	0.456873	0.419575		0.039695	0.0265966
7	1.75517e+09	-0.000133925	0.0392371	0.674655	0.619309	1.47506	0.0266004	0.457375	0.419853		0.0392682	0.0266214		-0.000126888	0.0392249	0.674591	0.619226	1.47484	0.026596	0.4574	0.41986		0.0392543	0.026616
8	1.75517e+09	-0.000125507	0.04039	0.693338	0.637408	1.5173	0.0266196	0.456955	0.420093		0.0404192	0.0266388		-0.00011847	0.0403777	0.693274	0.637325	1.51708	0.0266154	0.456979	0.420099		0.0404053	0.0266335
9	1.75517e+09	0.000152315	0.03975	0.681959	0.626339	1.49292	0.0266257	0.456796	0.419541		0.0397146	0.026602		0.000159353	0.0397377	0.681895	0.626257	1.4927	0.0266214	0.456821	0.419547		0.0397007	0.0265966
10	1.75517e+09	-4.84649e-06	0.0405589	0.694703	0.638363	1.52029	0.0266784	0.456954	0.419895		0.04056	0.0266791		2.19109e-06	0.0405466	0.694639	0.63828	1.52007	0.0266742	0.456978	0.419901		0.0405461	0.0266738
11	1.75517e+09	-1.0459e-05	0.0408815	0.702804	0.646029	1.53775	0.0265853	0.457035	0.420114		0.0408839	0.0265869		-3.42138e-06	0.0408692	0.70274	0.645946	1.53753	0.0265811	0.457058	0.42012		0.04087	0.0265817
12	1.75517e+09	0.000175705	0.0408195	0.698999	0.641508	1.5286	0.0267037	0.457279	0.419669		0.0407787	0.026677		0.000182742	0.0408072	0.698936	0.641425	1.52838	0.0266996	0.457303	0.419675		0.0407648	0.0266718
13	1.75517e+09	-0.000107737	0.0410572	0.701277	0.64477	1.53427	0.02676	0.457075	0.420245		0.0410822	0.0267763		-0.000100699	0.0410449	0.701213	0.644688	1.53405	0.0267559	0.457098	0.420251		0.0410683	0.0267711
14	1.75517e+09	6.5312e-05	0.0409588	0.700341	0.642706	1.53117	0.02675	0.457389	0.419749		0.0409437	0.0267401		7.23496e-05	0.0409466	0.700277	0.642623	1.53095	0.0267459	0.457413	0.419755		0.0409298	0.0267349
15	1.75517e+09	0.000149509	0.0410906	0.699952	0.643167	1.53281	0.0268073	0.456646	0.4196		0.0410559	0.0267847		0.000156546	0.0410783	0.699888	0.643085	1.53259	0.0268032	0.456669	0.419606		0.041042	0.0267794
16	1.75517e+09	6.06346e-05	0.0404043	0.69662	0.639762	1.52439	0.0265052	0.456982	0.419683		0.0403902	0.0264959		6.76722e-05	0.0403921	0.696557	0.639679	1.52417	0.0265009	0.457006	0.419689		0.0403763	0.0264906
17	1.75517e+09	6.81184e-05	0.0405417	0.694865	0.637973	1.51986	0.0266747	0.45719	0.419758		0.0405259	0.0266643		7.5156e-05	0.0405295	0.694801	0.63789	1.51964	0.0266705	0.457215	0.419764		0.040512	0.026659
18	1.75517e+09	0.000128927	0.0401611	0.69061	0.634096	1.51013	0.0265944	0.457318	0.419894		0.0401311	0.0265746		0.000135964	0.0401488	0.690546	0.634013	1.50991	0.0265901	0.457342	0.4199		0.0401172	0.0265692
19	1.75517e+09	9.89898e-05	0.0401076	0.689233	0.632841	1.50792	0.026598	0.457076	0.419679		0.0400846	0.0265828		0.000106027	0.0400954	0.689169	0.632758	1.5077	0.0265938	0.4571	0.419685		0.0400707	0.0265774
20	1.75517e+09	6.5312e-05	0.0405923	0.693302	0.636499	1.51699	0.0267585	0.457026	0.419581		0.0405771	0.0267485		7.23496e-05	0.04058	0.693239	0.636417	1.51677	0.0267543	0.45705	0.419587		0.0405632	0.0267432
***	Cup	L3	L1	C	H1	H2	L1 | H2	C | H2	H1 | H2
***	Info	tbdgy	tbdgy	tbdgy	tbdgy	tbdgy	tbdgy - St	tbdgy - St	tbdgy - St
***	Mean	3.94508e-05	0.0405347	0.694544	0.637949	1.51951	0.0266757	0.457083	0.419837		0.0405256	0.0266697		4.64884e-05	0.0405225	0.69448	0.637866	1.51929	0.0266715	0.457107	0.419843		0.0405117	0.0266644
***	StdErr (%)	54.523	0.28374	0.242367	0.246742	0.241913	0.0763135	0.0108616	0.011077		0.00280724	0.000740105		0.462691	0.00283826	0.0024239	0.00246774	0.00241948	0.000763538	0.000108625	0.000110769		0.0028082	0.000740561
***	StdErr (abs)	2.15097e-05	0.000115013	0.00168335	0.00157409	0.0036759	2.03572e-05	4.96467e-05	4.65052e-05
***	StdDev (%)	243.834	1.26892	1.0839	1.10346	1.08187	0.341285	0.0485748	0.0495377
***	StdDev (abs)	9.61945e-05	0.000514355	0.00752816	0.00703953	0.0164391	9.10401e-05	0.000222027	0.000207977
***	Valid Values	20 (20)	20 (20)	20 (20)	20 (20)	20 (20)	20 (20)	20 (20)	20 (20)

[truncated: 21 more sheets: z_14c_04, z_14dc_01, z_14dc_02, z_14dc_03, z_14dc_04, z_135_01, z_135_02, z_135_03, z_135_04, z_135c_01, z_135c_02, z_135c_03, z_135c_04, z_135dc_01, z_135dc_02, z_135dc_03, z_135dc_04, z_ref_01, z_ref_02, z_ref_03 …]
