# Supplementary material
Source: Royal Society of Chemistry journal article supplement (doi:10.1039/d6ja00106h)
Supplement: d6ja00106h2.xlsx [file d6ja00106h2.xlsx]

## Sheet: Summary
																									NIST SRM 981
blank	202-Hg	204-Pb	206-Pb	207-Pb	208-Pb																					204/208	206/208	207/208		204-Pb and 204/208 are 204-Hg corrected
blk-01	3.24906e-05	6.81999e-06	0.000141607	0.000149919	0.000345344																				R_z	0.0272321	0.461233	0.421862
blk-02	-5.05044e-06	1.008e-05	0.00011435	0.000176861	0.000348924																				u(R_z)	9.9e-06	8.51e-05	0.000109
	1.37201e-05	8.44998e-06	0.000127979	0.00016339	0.000347134			calculated
	1.93479	0.272799	0.150602	0.116595	0.00729336			calculated with GUM Workbench Pro
w/o blank corr	202-Hg	204-Pb	206-Pb	207-Pb	208-Pb	204/208	K_204/208	u(K_204/208)	K_204/208_av	plus u_K	min u_K	206/208	K_206/208	u(K_206/208)	K_206/208_av	plus u_K	min u_K	207/208	K_207/208	u(K_207/208)	K_207/208_av	plus u_K	min u_K		blank corr	202-Hg	204-Pb	206-Pb	207-Pb	208-Pb	204/208	K_204/208	u(K_204/208)	K_204/208_av	plus u_K	min u_K	206/208	K_206/208	u(K_206/208)	K_206/208_av	plus u_K	min u_K	207/208	K_207/208	u(K_207/208)	K_207/208_av	plus u_K	min u_K
z_ref_01	3.79494e-05	0.0898365	1.53695	1.41321	3.36478	0.0266966	1.02006	0.000488	1.01997	1.02047	1.01946	0.456776	1.00976	0.000192	1.00963	1.00983	1.00944	0.42	1.00443	0.000264	1.0044	1.00466	1.00413		z_ref_01	2.42293e-05	0.0898224	1.53682	1.41304	3.36444	0.0266978	1.02001	0.000488	1.01992	1.02043	1.01942	0.456785	1.00974	0.000192	1.00961	1.00981	1.00942	0.419995	1.00445	0.000264	1.00441	1.00468	1.00415
z_ref_02	2.53925e-05	0.0918981	1.57241	1.44571	3.44191	0.0266981	1.02	0.000533	1.01997	1.02047	1.01946	0.456843	1.00961	0.000198	1.00963	1.00983	1.00944	0.420031	1.00436	0.000264	1.0044	1.00466	1.00413		z_ref_02	1.16725e-05	0.0918869	1.57228	1.44554	3.44156	0.0266992	1.01996	0.000533	1.01992	1.02043	1.01942	0.456852	1.00959	0.000198	1.00961	1.00981	1.00942	0.420026	1.00437	0.000264	1.00441	1.00468	1.00415
z_ref_03	-4.50132e-06	0.0910083	1.55729	1.43172	3.4088	0.0266986	1.01999	0.000516	1.01997	1.02047	1.01946	0.456845	1.00961	0.000195	1.00963	1.00983	1.00944	0.420008	1.00442	0.000266	1.0044	1.00466	1.00413		z_ref_03	-1.82214e-05	0.091004	1.55716	1.43156	3.40845	0.0266997	1.01994	0.000516	1.01992	1.02043	1.01942	0.456854	1.00959	0.000195	1.00961	1.00981	1.00942	0.420003	1.00443	0.000266	1.00441	1.00468	1.00415
z_ref_04	5.58424e-05	0.0933276	1.59656	1.4678	3.49456	0.0267028	1.01982	0.000483	1.01997	1.02047	1.01946	0.456869	1.00955	0.000198	1.00963	1.00983	1.00944	0.420022	1.00438	0.000265	1.0044	1.00466	1.00413		z_ref_04	4.21223e-05	0.0933093	1.59643	1.46763	3.49422	0.026704	1.01978	0.000483	1.01992	1.02043	1.01942	0.456878	1.00953	0.000198	1.00961	1.00981	1.00942	0.420017	1.00439	0.000265	1.00441	1.00468	1.00415
z_ref	2.86707e-05	0.0915176	1.5658	1.43961	3.42751	0.026699	1.01997	0.000505415				0.456833	1.00963	0.000195766				0.420015	1.0044	0.000264751						1.49507e-05	0.0915057	1.56567	1.43944	3.42717	0.0267002	1.01992	0.000505415				0.456842	1.00961	0.000195766				0.42001	1.00441	0.000264751
	0.88593	0.0160918	0.0160483	0.0159965	0.0159697	0.000100096		0.000495521				8.76262e-05		0.000193898				3.32251e-05		0.000263592						1.69894	0.0160657	0.0160496	0.0159983	0.0159714	9.94587e-05		0.000495543				8.73498e-05		0.000193902				3.33844e-05		0.000263589
z_14_01	3.84538e-06	0.0562959	0.964033	0.886229	2.11017	0.0266779	1.02077	0.000617	1.02002	1.02067	1.01937	0.45685	1.00959	0.000194	1.00965	1.00985	1.00945	0.419979	1.00448	0.000269	1.00449	1.00476	1.00422		z_14_01	-9.87468e-06	0.0562898	0.963905	0.886066	2.10983	0.0266798	1.0207	0.000617	1.01995	1.02059	1.01931	0.456865	1.00956	0.000194	1.00962	1.00982	1.00942	0.419971	1.0045	0.000269	1.00451	1.00477	1.00424
z_14_02	-5.21767e-06	0.0561564	0.961245	0.883658	2.10421	0.0266882	1.02038	0.000681	1.02002	1.02067	1.01937	0.45682	1.00966	0.000203	1.00965	1.00985	1.00945	0.419947	1.00456	0.000267	1.00449	1.00476	1.00422		z_14_02	-1.89377e-05	0.0561523	0.961117	0.883494	2.10387	0.0266901	1.02031	0.000681	1.01995	1.02059	1.01931	0.456834	1.00963	0.000203	1.00962	1.00982	1.00942	0.419939	1.00458	0.000267	1.00451	1.00477	1.00424
z_14_03	1.21069e-05	0.0591026	1.01096	0.929381	2.21281	0.0267081	1.01962	0.000635	1.02002	1.02067	1.01937	0.456868	1.00955	0.000207	1.00965	1.00985	1.00945	0.42	1.00444	0.000283	1.00449	1.00476	1.00422		z_14_03	-1.61321e-06	0.0590946	1.01084	0.929218	2.21247	0.0267099	1.01955	0.000635	1.01995	1.02059	1.01931	0.456882	1.00952	0.000207	1.00962	1.00982	1.00942	0.419992	1.00445	0.000267	1.00451	1.00477	1.00424
z_14_04	-4.65401e-06	0.0595164	1.01754	0.935629	2.22775	0.0267164	1.01931	0.000681	1.02002	1.02067	1.01937	0.456759	1.0098	0.000199	1.00965	1.00985	1.00945	0.419988	1.00446	0.000263	1.00449	1.00476	1.00422		z_14_04	-1.83741e-05	0.0595122	1.01742	0.935465	2.2274	0.0267182	1.01924	0.00062	1.01995	1.02059	1.01931	0.456773	1.00977	0.000199	1.00962	1.00982	1.00942	0.41998	1.00448	0.000263	1.00451	1.00477	1.00424
z_14	1.52014e-06	0.0577678	0.988446	0.908724	2.16374	0.0266976	1.02002	0.000654109				0.456824	1.00965	0.000200808				0.419979	1.00449	0.000270605						-1.21999e-05	0.0577622	0.988318	0.908561	2.16339	0.0266995	1.01995	0.000638763				0.456838	1.00962	0.000200808				0.41997	1.00451	0.000266509
	5.38466	0.0309704	0.0302924	0.0303698	0.0303274	0.000662107		0.000641271				0.000104923		0.000198888				5.38555e-05		0.000269396						-0.670941	0.0309654	0.0302963	0.0303753	0.0303323	0.000660157		0.000626269				0.00010525		0.000198894				5.43292e-05		0.000265314
z_14c_01	-1.24354e-05	0.0386806	0.662231	0.608237	1.44875	0.0267012	1.01988	0.00119	1.02124	1.02211	1.02037	0.457105	1.00903	0.000202	1.00911	1.00931	1.00891	0.419836	1.00483	0.00028	1.00498	1.00526	1.0047		z_14c_01	-2.61555e-05	0.0386782	0.662103	0.608074	1.4484	0.026704	1.01978	0.00119	1.02113	1.02201	1.02026	0.457126	1.00898	0.000202	1.00907	1.00927	1.00886	0.419823	1.00486	0.000279	1.00501	1.00529	1.00473
z_14c_02	-4.3628e-05	0.0383559	0.657585	0.603944	1.43874	0.0266668	1.0212	0.000785	1.02124	1.02211	1.02037	0.457056	1.00914	0.000199	1.00911	1.00931	1.00891	0.419773	1.00498	0.000279	1.00498	1.00526	1.0047		z_14c_02	-5.73481e-05	0.0383607	0.657457	0.60378	1.43839	0.0266696	1.02109	0.000785	1.02113	1.02201	1.02026	0.457078	1.00909	0.000199	1.00907	1.00927	1.00886	0.419761	1.00501	0.000279	1.00501	1.00529	1.00473
z_14c_03	7.24364e-05	0.0404032	0.692709	0.636138	1.5156	0.0266471	1.02196	0.000735	1.02124	1.02211	1.02037	0.457052	1.00915	0.0002	1.00911	1.00931	1.00891	0.419727	1.00509	0.000283	1.00498	1.00526	1.0047		z_14c_03	5.87163e-05	0.0403811	0.692581	0.635975	1.51526	0.0266497	1.02185	0.000735	1.02113	1.02201	1.02026	0.457073	1.0091	0.0002	1.00907	1.00927	1.00886	0.419715	1.00512	0.000283	1.00501	1.00529	1.00473
z_14c_04	1.53196e-05	0.0401871	0.689221	0.632959	1.50794	0.0266482	1.02191	0.000683	1.02124	1.02211	1.02037	0.457062	1.00913	0.000202	1.00911	1.00931	1.00891	0.419751	1.00503	0.000276	1.00498	1.00526	1.0047		z_14c_04	1.5995e-06	0.0401782	0.689093	0.632795	1.50759	0.0266508	1.02181	0.000683	1.02113	1.02201	1.02026	0.457082	1.00908	0.000202	1.00907	1.00927	1.00886	0.419739	1.00506	0.000276	1.00501	1.00529	1.00473
z_14c	7.92312e-06	0.0394067	0.675437	0.620319	1.47776	0.0266658	1.02124	0.000871642				0.457069	1.00911	0.000200754				0.419772	1.00498	0.000279511						-5.79694e-06	0.0393996	0.675309	0.620156	1.47741	0.0266685	1.02113	0.000871642				0.45709	1.00907	0.000200754				0.41976	1.00501	0.000279261
	6.22109	0.0263449	0.0267782	0.0267192	0.0268041	0.00094734		0.000853515				5.36817e-05		0.000198942				0.000111284		0.000278126						-8.50285	0.0260869	0.0267833	0.0267262	0.0268104	0.000949546		0.000853601				5.42822e-05		0.000198951				0.000110734		0.000277869
z_14dc_01	-2.70454e-05	0.0267305	0.458923	0.421653	1.00439	0.0266197	1.02301	0.00111	1.02063	1.02179	1.01948	0.456919	1.00944	0.000205	1.00932	1.00954	1.0091	0.419812	1.00488	0.000297	1.00477	1.00506	1.00448		z_14dc_01	-4.07654e-05	0.0267315	0.458795	0.421489	1.00404	0.0266237	1.02285	0.00111	1.02048	1.02163	1.01933	0.456949	1.00938	0.000205	1.00925	1.00948	1.00903	0.419795	1.00493	0.000297	1.00481	1.0051	1.00452
z_14dc_02	2.73326e-05	0.0268536	0.45937	0.422144	1.00527	0.026707	1.01966	0.00138	1.02063	1.02179	1.01948	0.456961	1.00935	0.000228	1.00932	1.00954	1.0091	0.419929	1.0046	0.000283	1.00477	1.00506	1.00448		z_14dc_02	1.36125e-05	0.026842	0.459242	0.42198	1.00493	0.026711	1.01951	0.00138	1.02048	1.02163	1.01933	0.456991	1.00928	0.000229	1.00925	1.00948	1.00903	0.419912	1.00465	0.000283	1.00481	1.0051	1.00452
z_14dc_03	8.91004e-05	0.0269709	0.460229	0.422809	1.00712	0.0267597	1.01766	0.000926	1.02063	1.02179	1.01948	0.456974	1.00932	0.000218	1.00932	1.00954	1.0091	0.41982	1.00487	0.000289	1.00477	1.00506	1.00448		z_14dc_03	7.53804e-05	0.0269449	0.460101	0.422646	1.00678	0.0267637	1.0175	0.000926	1.02048	1.02163	1.01933	0.457005	1.00925	0.000218	1.00925	1.00948	1.00903	0.419802	1.00491	0.00029	1.00481	1.0051	1.00452
z_14dc_04	2.73219e-05	0.0272517	0.467419	0.429414	1.0227	0.0266403	1.02222	0.00114	1.02063	1.02179	1.01948	0.457043	1.00917	0.000236	1.00932	1.00954	1.0091	0.419881	1.00472	0.000293	1.00477	1.00506	1.00448		z_14dc_04	1.36018e-05	0.0272401	0.467291	0.42925	1.02235	0.0266442	1.02207	0.00114	1.02048	1.02163	1.01933	0.457073	1.0091	0.000236	1.00925	1.00948	1.00903	0.419864	1.00476	0.000293	1.00481	1.0051	1.00452
z_14dc	2.91774e-05	0.0269517	0.461485	0.424005	1.00987	0.0266817	1.02063	0.00115039				0.456974	1.00932	0.000222052				0.41986	1.00477	0.000290546						1.54573e-05	0.0269396	0.461357	0.423841	1.00952	0.0266856	1.02048	0.00115039				0.457004	1.00925	0.000222309				0.419843	1.00481	0.000290795
	1.62675	0.00826687	0.00865251	0.00857745	0.00854547	0.0023973		0.00112713				0.000112968		0.000220002				0.000131488		0.000289167						3.07068	0.00810869	0.00865491	0.00858075	0.00854841	0.00239817		0.0011273				0.000112473		0.000220271				0.000131619		0.000289403
z_135_01	-8.47746e-06	0.0568764	0.973703	0.895123	2.13143	0.0266855	1.02049	0.000508	1.02028	1.02085	1.01971	0.45683	1.00964	0.000204	1.00971	1.00992	1.00951	0.419963	1.00452	0.000269	1.00451	1.00478	1.00424		z_135_01	-2.21975e-05	0.0568732	0.973575	0.89496	2.13109	0.0266873	1.02041	0.000508	1.02021	1.02078	1.01964	0.456845	1.00961	0.000204	1.00968	1.00989	1.00948	0.419955	1.00454	0.000269	1.00453	1.0048	1.00424
z_135_02	2.22383e-06	0.0580333	0.993304	0.913188	2.17438	0.0266894	1.02033	0.000646	1.02028	1.02085	1.01971	0.456822	1.00966	0.000203	1.00971	1.00992	1.00951	0.419977	1.00449	0.000265	1.00451	1.00478	1.00424		z_135_02	-1.14962e-05	0.0580275	0.993176	0.913025	2.17403	0.0266913	1.02026	0.000646	1.02021	1.02078	1.01964	0.456836	1.00963	0.000203	1.00968	1.00989	1.00948	0.419969	1.00451	0.000265	1.00453	1.0048	1.00424
z_135_03	-9.63714e-05	0.0588598	1.00722	0.92621	2.20528	0.0267007	1.0199	0.000561	1.02028	1.02085	1.01971	0.456734	1.00985	0.000201	1.00971	1.00992	1.00951	0.419997	1.00444	0.000267	1.00451	1.00478	1.00424		z_135_03	-0.000110091	0.058877	1.0071	0.926046	2.20493	0.0267025	1.01984	0.000561	1.02021	1.02078	1.01964	0.456748	1.00982	0.000201	1.00968	1.00989	1.00948	0.419989	1.00446	0.000267	1.00453	1.0048	1.00424
z_135_04	9.14144e-06	0.0595901	1.01992	0.937617	2.23275	0.0266882	1.02038	0.000552	1.02028	1.02085	1.01971	0.456799	1.00971	0.000203	1.00971	1.00992	1.00951	0.419937	1.00459	0.000266	1.00451	1.00478	1.00424		z_135_04	-4.57862e-06	0.0595827	1.01979	0.937454	2.23241	0.02669	1.02031	0.000552	1.02021	1.02078	1.01964	0.456812	1.00968	0.000203	1.00968	1.00989	1.00948	0.419929	1.0046	0.000266	1.00453	1.0048	1.00424
z_135	-2.33709e-05	0.0583399	0.998538	0.918034	2.18596	0.0266909	1.02028	0.000568947				0.456796	1.00971	0.000202753				0.419969	1.00451	0.000266754						-3.7091e-05	0.0583401	0.99841	0.917871	2.18561	0.0266928	1.02021	0.000568947				0.45681	1.00968	0.000202753				0.41996	1.00453	0.000266754
	-2.10534	0.0199629	0.0198348	0.0198749	0.0198881	0.000250898		0.00055764				9.54857e-05		0.000200802				6.04686e-05		0.000265557						-1.32657	0.0199945	0.0198373	0.0198785	0.0198912	0.000250326		0.000557679				9.58522e-05		0.000200809				6.04032e-05		0.000265551
z_135c_01	-1.05715e-07	0.0416237	0.713401	0.655329	1.56084	0.0266676	1.02117	0.000777	1.02074	1.02151	1.01997	0.457063	1.00912	0.00021	1.00909	1.0093	1.00888	0.419858	1.00478	0.000275	1.00476	1.00504	1.00449		z_135c_01	-1.38258e-05	0.0416185	0.713273	0.655165	1.56049	0.0266702	1.02107	0.000777	1.02064	1.02141	1.01987	0.457083	1.00908	0.00021	1.00905	1.00925	1.00884	0.419846	1.0048	0.000275	1.00479	1.00507	1.00451
z_135c_02	-1.55913e-05	0.041486	0.710548	0.652678	1.55449	0.02669	1.02031	0.000763	1.02074	1.02151	1.01997	0.457094	1.00906	0.000206	1.00909	1.0093	1.00888	0.419867	1.00475	0.00028	1.00476	1.00504	1.00449		z_135c_02	-2.93114e-05	0.0414844	0.71042	0.652515	1.55414	0.0266926	1.02021	0.000763	1.02064	1.02141	1.01987	0.457114	1.00901	0.000206	1.00905	1.00925	1.00884	0.419856	1.00478	0.00028	1.00479	1.00507	1.00451
z_135c_03	-3.43963e-05	0.0243446	0.417103	0.383153	0.912947	0.0186449			1.02074	1.02151	1.01997	0.465376			1.00909	1.0093	1.00888	0.407062			1.00476	1.00504	1.00449		z_135c_03	-4.81163e-05	0.0243471	0.416975	0.38299	0.9126	0.0179394			1.02064	1.02141	1.01987	0.471189			1.00905	1.00925	1.00884	0.402581			1.00479	1.00507	1.00451
z_135c_04	-1.45129e-05	1.18457e-05	0.00038738	0.0003023	0.000946544	0.049246			1.02074	1.02151	1.01997	0.407138			1.00909	1.0093	1.00888	0.324991			1.00476	1.00504	1.00449		z_135c_04	-2.82329e-05	1.07729e-05	0.000259402	0.00013891	0.00059941	-0.27997			1.02064	1.02141	1.01987	-0.962779			1.00905	1.00925	1.00884	-0.36541			1.00479	1.00507	1.00451
z_135c	-7.84853e-06	0.0415549	0.711974	0.654003	1.55766	0.0266788	1.02074	0.000770032				0.457079	1.00909	0.00020801				0.419862	1.00476	0.000277511						-2.15686e-05	0.0415514	0.711846	0.65384	1.55732	0.0266814	1.02064	0.000770032				0.457098	1.00905	0.00020801				0.419851	1.00479	0.000277511
	-1.39516	0.00234278	0.00283371	0.00286578	0.00288112	0.000594111		0.000754385				4.82789e-05		0.000206136				1.59199e-05		0.000276196						-0.507682	0.00228179	0.00283422	0.0028665	0.00288177	0.00059446		0.000754458				4.84125e-05		0.000206145				1.5846e-05		0.000276188
z_135dc_01	-1.2762e-05	0.0229893	0.395	0.362792	0.864289	0.0266026	1.02367	0.00146	1.02129	1.02264	1.01994	0.457023	1.00921	2.42e-06	1.00919	1.00938	1.00901	0.419758	1.00501	0.000292	1.00491	1.0052	1.00463		z_135dc_01	-2.64821e-05	0.022987	0.394872	0.362628	0.863942	0.0266071	1.02349	0.00146	1.02111	1.02246	1.01976	0.457058	1.00914	0.000242	1.00912	1.00934	1.00889	0.419737	1.00506	0.000292	1.00496	1.00525	1.00468
z_135dc_02	3.67915e-07	0.0225994	0.387328	0.355718	0.847325	0.0266721	1.021	0.00139	1.02129	1.02264	1.01994	0.45712	1.009	0.000229	1.00919	1.00938	1.00901	0.419812	1.00488	0.000293	1.00491	1.0052	1.00463		z_135dc_02	-1.33521e-05	0.022594	0.3872	0.355554	0.846978	0.0266768	1.02082	0.00139	1.02111	1.02246	1.01976	0.457156	1.00892	0.000229	1.00912	1.00934	1.00889	0.419791	1.00493	0.000293	1.00496	1.00525	1.00468
z_135dc_03	6.01628e-06	0.0232354	0.39795	0.365566	0.870617	0.0266871	1.02042	0.00135	1.02129	1.02264	1.01994	0.45709	1.00906	0.00021	1.00919	1.00938	1.00901	0.419893	1.00469	0.000285	1.00491	1.0052	1.00463		z_135dc_03	-7.70378e-06	0.0232288	0.397822	0.365402	0.87027	0.0266917	1.02025	0.00135	1.02111	1.02246	1.01976	0.457125	1.00899	0.00021	1.00912	1.00934	1.00889	0.419872	1.00474	0.000285	1.00496	1.00525	1.00468
z_135dc_04	3.87743e-06	0.0227521	0.389375	0.357711	0.852225	0.0266964	1.02007	0.00118	1.02129	1.02264	1.01994	0.456893	1.0095	0.00021	1.00919	1.00938	1.00901	0.419737	1.00506	0.000277	1.00491	1.0052	1.00463		z_135dc_04	-9.84263e-06	0.022746	0.389247	0.357547	0.851878	0.0267011	1.01989	0.00118	1.02111	1.02246	1.01976	0.456929	1.00942	0.00021	1.00912	1.00934	1.00889	0.419716	1.00511	0.000277	1.00496	1.00525	1.00468
z_135dc	-6.251e-07	0.0228941	0.392413	0.360446	0.858614	0.0266645	1.02129	0.00134894				0.457031	1.00919	0.000187515				0.4198	1.00491	0.000286822						-1.43452e-05	0.022889	0.392285	0.360283	0.858267	0.0266692	1.02111	0.00134894				0.457067	1.00912	0.000223162				0.419779	1.00496	0.000286822
	-13.4693	0.0121618	0.0125218	0.0125666	0.0124816	0.00159442		0.00132083				0.000220598		0.000185806				0.000165329		0.000285419						-0.586934	0.0121626	0.0125259	0.0125722	0.0124866	0.00159538		0.00132106				0.000220516		0.000221146				0.000165712		0.000285405

## Sheet: blk-01
Cycle	Time	202Hg	204Pb	206Pb	207Pb	208Pb	204Pb/208Pb (1)	206Pb/208Pb (2)	207Pb/208Pb (3)
1	1.75524e+09	0.000140951	0.000110597	0.000213038	-8.8346e-06	0.000190439	0.58075	1.11867	-0.0463907
2	1.75524e+09	1.55966e-05	7.51295e-06	0.000222598	0.000204337	0.0004042	0.0185872	0.550713	0.505536
3	1.75524e+09	0.000116627	0.000138713	0.000211126	0.000374153	0.000218812	0.633939	0.964874	1.70993
4	1.75524e+09	-0.000168664	9.27911e-05	0.000256059	0.000101519	0.000285964	0.324486	0.895427	0.355005
5	1.75524e+09	-0.000146218	-0.000147093	0.000126044	-0.000102201	0.000285964	-0.514378	0.440768	-0.357391
6	1.75524e+09	-1.43365e-05	-0.000142409	0.000146119	8.14202e-06	0.000184765	-0.770758	0.790837	0.044067
7	1.75524e+09	7.1778e-06	-1.59138e-05	-0.000130115	9.01998e-05	-4.31322e-05	0.368954	3.01664	-2.09124
8	1.75524e+09	-6.95231e-05	-6.27657e-05	9.7366e-05	5.81304e-05	0.000265155	-0.236713	0.367203	0.219231
9	1.75524e+09	1.27903e-05	3.46887e-05	-0.000147317	-4.75025e-05	-4.50233e-05	-0.770462	3.27202	1.05506
10	1.75524e+09	-1.71426e-05	-6.27657e-05	-9.69013e-06	0.000193961	-4.50233e-05	1.39407	0.215225	-4.30801
11	1.75524e+09	0.000272871	2.82755e-06	0.000546744	0.000365662	0.000952052	0.00296996	0.574279	0.384077
12	1.75524e+09	0.000198956	0.000281179	4.28806e-05	0.000162831	0.000385281	0.729802	0.111297	0.42263
13	1.75524e+09	0.000290649	0.000200571	0.000312469	-8.42827e-05	0.000281234	0.71318	1.11106	-0.299688
14	1.75524e+09	-7.79411e-05	-0.000146156	0.000846122	0.00123914	0.00226377	-0.0645634	0.373768	0.547379
15	1.75524e+09	0.000174631	0.000279304	0.000377486	0.000281694	0.00048177	0.579746	0.78354	0.584707
16	1.75524e+09	0.000188665	2.34435e-05	4.00131e-05	0.000107178	0.000442984	0.0529217	0.0903262	0.241946
17	1.75524e+09	-0.00010413	-0.000239846	-0.000129159	-2.20384e-05	0.000162067	-1.47992	-0.796947	-0.135983
18	1.75524e+09	1.37257e-05	-6.18287e-05	-7.75501e-05	5.1528e-05	9.96518e-05	-0.620447	-0.778211	0.517081
19	1.75524e+09	-2.55611e-05	-0.00012367	4.64708e-06	-3.17576e-06	0.000135587	-0.912104	0.0342737	-0.0234222
20	1.75524e+09	-0.000159312	-3.27807e-05	-0.000116735	2.79484e-05	3.62723e-07	-90.374	-321.829	77.0517
***	Cup	L3	L1	C	H1	H2	L1 | H2	C | H2	H1 | H2
***	Info	tbdgy	tbdgy	tbdgy	tbdgy	tbdgy	tbdgy - St	tbdgy - St	tbdgy - St
***	Mean	3.24906e-05	6.81999e-06	0.000141607	0.000149919	0.000345344	-4.5172	-15.4347	3.81881
***	StdErr (%)	96.7799	468.17	39.4223	43.3104	32.8067	-100.094	-104.489	101.189
***	StdErr (abs)	3.14444e-05	3.19292e-05	5.58248e-05	6.49306e-05	0.000113296	4.52146	16.1275	3.86422
***	StdDev (%)	432.813	2093.72	176.302	193.69	146.716	-447.636	-467.289	452.531
***	StdDev (abs)	0.000140623	0.000142792	0.000249656	0.000290378	0.000506675	20.2206	72.1245	17.2813
***	Valid Values	20 (20)	20 (20)	20 (20)	20 (20)	20 (20)	20 (20)	20 (20)	20 (20)

## Sheet: blk-02
Cycle	Time	202Hg	204Pb	206Pb	207Pb	208Pb	204Pb/208Pb (1)	206Pb/208Pb (2)	207Pb/208Pb (3)
1	1.75525e+09	3.21705e-05	6.60607e-05	-6.94777e-05	8.35382e-05	0.000280433	0.235567	-0.247752	0.29789
2	1.75525e+09	-1.17949e-05	6.69979e-05	-9.14595e-05	-7.39663e-05	0.000122491	0.546962	-0.746664	-0.603852
3	1.75525e+09	-0.000139003	-0.000225343	7.67614e-05	0.000401453	-2.88076e-05	7.82236	-2.66463	-13.9357
4	1.75525e+09	0.000120107	-0.000325581	0.00017331	0.000119381	0.000247329	-1.31639	0.700726	0.48268
5	1.75525e+09	4.71379e-05	5.10668e-05	-6.94777e-05	4.58103e-05	0.000234088	0.218152	-0.296802	0.195697
6	1.75525e+09	0.000194953	6.41865e-05	5.07291e-06	8.91975e-05	0.000179234	0.358116	0.0283033	0.49766
7	1.75525e+09	-0.000103461	6.51236e-05	0.000212506	0.00012787	0.000316375	0.205843	0.671688	0.404173
8	1.75525e+09	0.000353083	0.000215076	0.000266044	0.00028635	0.000195311	1.10119	1.36215	1.46612
9	1.75525e+09	0.0001594	0.000186021	0.00018287	0.000188241	0.000249221	0.746409	0.733766	0.755316
10	1.75525e+09	6.02345e-05	0.000229135	-8.66809e-05	0.000119381	0.000156536	1.46378	-0.553744	0.762642
11	1.75525e+09	5.36862e-05	-2.48366e-05	9.01438e-05	9.76865e-05	0.000302187	-0.0821894	0.298304	0.323265
12	1.75525e+09	-9.50431e-05	0.000133536	0.000121689	0.000219371	0.000302187	0.441899	0.402693	0.725942
13	1.75525e+09	3.21705e-05	5.10668e-05	0.000106394	0.000279746	0.000385426	0.132494	0.276043	0.72581
14	1.75525e+09	-1.46011e-05	8.66778e-05	-2.57356e-06	8.16517e-05	0.000247329	0.350455	-0.0104054	0.330134
15	1.75525e+09	-2.30197e-05	-0.000115726	-0.000132555	2.789e-05	0.000133839	-0.864661	-0.990403	0.208385
16	1.75525e+09	-0.000143679	0.000114793	8.72762e-05	-0.000101315	-0.000178192	-0.644207	-0.489786	0.56857
17	1.75525e+09	-0.000128714	-0.000102608	4.13944e-05	-0.000131492	0.000260571	-0.393782	0.158861	-0.504629
18	1.75525e+09	-0.000151161	-0.000125095	0.000692538	0.000909318	0.00182902	-0.0683946	0.378639	0.497161
19	1.75525e+09	-0.000182961	7.96044e-06	0.000613154	0.000606218	0.00150036	0.00530569	0.408671	0.404048
20	1.75525e+09	-0.000160514	-0.000216912	7.00703e-05	0.000160885	0.000243546	-0.890639	0.287709	0.660593
***	Cup	L3	L1	C	H1	H2	L1 | H2	C | H2	H1 | H2
***	Info	tbdgy	tbdgy	tbdgy	tbdgy	tbdgy	tbdgy - St	tbdgy - St	tbdgy - St
***	Mean	-5.05044e-06	1.008e-05	0.00011435	0.000176861	0.000348924	0.468414	-0.0146313	-0.286903
***	StdErr (%)	-619.548	336.183	41.8676	30.5799	30.1233	88.6184	-1284.07	-252.693
***	StdErr (abs)	3.12899e-05	3.38871e-05	4.78756e-05	5.40839e-05	0.000105108	0.415101	0.187876	0.724985
***	StdDev (%)	-2770.7	1503.45	187.238	136.758	134.716	396.313	-5742.53	-1130.08
***	StdDev (abs)	0.000139933	0.000151548	0.000214106	0.000241871	0.000470056	1.85639	0.840208	3.24223
***	Valid Values	20 (20)	20 (20)	20 (20)	20 (20)	20 (20)	20 (20)	20 (20)	20 (20)

## Sheet: z_14_01
											M(202Hg)	g/mol	201.971	8e-07	K(204Hg)	1	0.990307			M	Meng Wang et al 2021 Chinese Phys. C 45 030003
											M(204Hg)	g/mol	203.973	5e-07	K(204Pb)	1	1.02077			x	De Laeter et al., 2003 IUPAC, Pure and Applied Chemistry 75, 683–800
											M(206Pb)	g/mol	205.974	1.2e-06	K(206Pb)	1	1.00959			R_cert	NIST SRM 981 certificate of analysis
											M(208Pb)	g/mol	207.977	1.2e-06	K(207Pb)	1	1.00448
											x(202Hg)	mol/mol	0.2986	0.0026
											x(204Hg)	mol/mol	0.0687	0.0015
											R204,cert	mol/mol	0.0272321
											R206,cert	mol/mol	0.461233
											R207,cert	mol/mol	0.421862
											g	1	-1.02006
														blank correction
Cycle	Time	202Hg	204Pb	206Pb	207Pb	208Pb	204Pb/208Pb (1)	206Pb/208Pb (2)	207Pb/208Pb (3)		204Pb_corr	204Pb_corr Pb/208Pb (1)		202Hg	204Pb	206Pb	207Pb	208Pb	204Pb/208Pb (1)	206Pb/208Pb (2)	207Pb/208Pb (3)		204Pb_corr_bl	204Pb_corr_bl Pb/208Pb (1)
1	1.75524e+09	-4.30232e-05	0.0568507	0.971741	0.893804	2.12777	0.0267185	0.456695	0.420066		0.0568607	0.0267232		-5.67433e-05	0.0568423	0.971613	0.89364	2.12742	0.0267189	0.456709	0.420058		0.0568555	0.0267251
2	1.75524e+09	0.000122553	0.0571521	0.980064	0.900747	2.14535	0.02664	0.456832	0.419861		0.0571236	0.0266268		0.000108833	0.0571436	0.979936	0.900584	2.145	0.0266404	0.456847	0.419853		0.0571184	0.0266286
3	1.75524e+09	0.000126295	0.05674	0.973924	0.895131	2.1321	0.0266122	0.45679	0.419834		0.0567107	0.0265985		0.000112575	0.0567316	0.973796	0.894967	2.13176	0.0266126	0.456804	0.419826		0.0567054	0.0266003
4	1.75524e+09	-7.01489e-05	0.0547149	0.940637	0.864691	2.05802	0.0265862	0.457059	0.420157		0.0547312	0.0265941		-8.3869e-05	0.0547065	0.940509	0.864528	2.05767	0.0265866	0.457074	0.420148		0.054726	0.026596
5	1.75524e+09	-0.000144975	0.0570385	0.976144	0.897685	2.13708	0.0266899	0.456766	0.420052		0.0570722	0.0267057		-0.000158695	0.05703	0.976016	0.897521	2.13673	0.0266903	0.45678	0.420044		0.0570669	0.0267076
6	1.75524e+09	-5.51831e-05	0.0564224	0.96565	0.887639	2.1131	0.0267013	0.456983	0.420065		0.0564353	0.0267073		-6.89032e-05	0.056414	0.965522	0.887475	2.11275	0.0267017	0.456997	0.420056		0.05643	0.0267092
7	1.75524e+09	9.9165e-05	0.0562579	0.966487	0.888596	2.11595	0.0265876	0.456763	0.419952		0.0562349	0.0265767		8.54449e-05	0.0562495	0.966359	0.888432	2.1156	0.0265879	0.456778	0.419943		0.0562296	0.0265786
8	1.75524e+09	-3.46048e-05	0.0560742	0.961121	0.883396	2.10371	0.0266549	0.456869	0.419922		0.0560822	0.0266587		-4.83248e-05	0.0560657	0.960993	0.883232	2.10337	0.0266552	0.456884	0.419914		0.0560769	0.0266606
9	1.75524e+09	9.16809e-05	0.0565812	0.967401	0.889623	2.11769	0.0267184	0.45682	0.420092		0.0565599	0.0267084		7.79608e-05	0.0565728	0.967273	0.889459	2.11734	0.0267188	0.456834	0.420083		0.0565547	0.0267102
10	1.75524e+09	-0.000112239	0.0567025	0.973279	0.894401	2.13017	0.0266188	0.456902	0.419873		0.0567286	0.026631		-0.000125959	0.0566941	0.973151	0.894238	2.12982	0.0266191	0.456916	0.419865		0.0567233	0.0266329
11	1.75524e+09	8.98099e-05	0.0561021	0.961682	0.884175	2.10553	0.0266452	0.456742	0.419931		0.0560812	0.0266353		7.60898e-05	0.0560936	0.961554	0.884012	2.10518	0.0266455	0.456757	0.419923		0.0560759	0.0266371
12	1.75524e+09	5.23903e-05	0.0569258	0.970517	0.891961	2.12445	0.0267955	0.456831	0.419855		0.0569137	0.0267898		3.86702e-05	0.0569174	0.970389	0.891798	2.12411	0.0267959	0.456846	0.419846		0.0569084	0.0267917
13	1.75524e+09	0.000130973	0.0565139	0.966341	0.888675	2.11507	0.0267196	0.456883	0.420163		0.0564834	0.0267052		0.000117253	0.0565054	0.966213	0.888511	2.11473	0.02672	0.456898	0.420154		0.0564782	0.0267071
14	1.75524e+09	2.61974e-05	0.0552982	0.945099	0.868789	2.0681	0.0267386	0.456989	0.42009		0.0552921	0.0267357		1.24774e-05	0.0552897	0.944972	0.868625	2.06775	0.026739	0.457004	0.420081		0.0552868	0.0267376
15	1.75524e+09	-0.000117851	0.0557731	0.955617	0.878559	2.09257	0.0266529	0.456671	0.419847		0.0558005	0.026666		-0.000131571	0.0557647	0.955489	0.878395	2.09222	0.0266533	0.456686	0.419838		0.0557953	0.0266679
16	1.75524e+09	2.99392e-05	0.0569104	0.975014	0.896344	2.13337	0.0266763	0.45703	0.420154		0.0569035	0.0266731		1.62192e-05	0.056902	0.974886	0.896181	2.13302	0.0266767	0.457044	0.420146		0.0568982	0.0266749
17	1.75524e+09	2.71329e-05	0.055876	0.957513	0.880452	2.09577	0.0266613	0.456879	0.420109		0.0558697	0.0266583		1.34128e-05	0.0558676	0.957385	0.880288	2.09542	0.0266617	0.456893	0.4201		0.0558645	0.0266602
18	1.75524e+09	-0.000144039	0.0554693	0.950696	0.873706	2.0813	0.0266513	0.45678	0.419789		0.0555028	0.0266674		-0.000157759	0.0554609	0.950568	0.873543	2.08095	0.0266517	0.456795	0.41978		0.0554975	0.0266693
19	1.75524e+09	-0.000130945	0.055952	0.95571	0.877878	2.09155	0.0267515	0.456939	0.419727		0.0559824	0.026766		-0.000144665	0.0559436	0.955582	0.877715	2.0912	0.0267519	0.456954	0.419718		0.0559772	0.026768
20	1.75524e+09	0.00013378	0.0565629	0.966015	0.888329	2.11483	0.0267459	0.456782	0.420048		0.0565319	0.0267312		0.00012006	0.0565545	0.965888	0.888166	2.11448	0.0267463	0.456797	0.42004		0.0565266	0.0267331
***	Cup	L3	L1	C	H1	H2	L1 | H2	C | H2	H1 | H2
***	Info	tbdgy	tbdgy	tbdgy	tbdgy	tbdgy	tbdgy - St	tbdgy - St	tbdgy - St
***	Mean	3.84538e-06	0.0562959	0.964033	0.886229	2.11017	0.0266783	0.45685	0.419979		0.056295	0.0266779		-9.87468e-06	0.0562875	0.963905	0.886066	2.10983	0.0266787	0.456865	0.419971		0.0562898	0.0266798
***	StdErr (%)	586.835	0.254165	0.24493	0.246208	0.246587	0.047995	0.00529951	0.00720718		0.00251255	0.000482899		-2.28524	0.00254203	0.00244963	0.00246253	0.00246628	0.000480019	5.30286e-05	7.20816e-05		0.00251278	0.000482943
***	StdErr (abs)	2.2566e-05	0.000143085	0.00236121	0.00218196	0.00520341	1.28042e-05	2.42108e-05	3.02687e-05
***	StdDev (%)	2624.41	1.13666	1.09536	1.10107	1.10277	0.21464	0.0237001	0.0322315
***	StdDev (abs)	0.000100918	0.000639894	0.0105596	0.00975803	0.0232704	5.72623e-05	0.000108274	0.000135366
***	Valid Values	20 (20)	20 (20)	20 (20)	20 (20)	20 (20)	20 (20)	20 (20)	20 (20)

## Sheet: z_14_02
											M(202Hg)	g/mol	201.971	8e-07	K(204Hg)	1	0.99024			M	Meng Wang et al 2021 Chinese Phys. C 45 030003
											M(204Hg)	g/mol	203.973	5e-07	K(204Pb)	1	1.02038			x	De Laeter et al., 2003 IUPAC, Pure and Applied Chemistry 75, 683–800
											M(206Pb)	g/mol	205.974	1.2e-06	K(206Pb)	1	1.00966			R_cert	NIST SRM 981 certificate of analysis
											M(208Pb)	g/mol	207.977	1.2e-06	K(207Pb)	1	1.00456
											x(202Hg)	mol/mol	0.2986	0.0026
											x(204Hg)	mol/mol	0.0687	0.0015
											R204,cert	mol/mol	0.0272321
											R206,cert	mol/mol	0.461233
											R207,cert	mol/mol	0.421862
											g	1	-1.02006
														blank correction
Cycle	Time	202Hg	204Pb	206Pb	207Pb	208Pb	204Pb/208Pb (1)	206Pb/208Pb (2)	207Pb/208Pb (3)		204Pb_corr	204Pb_corr Pb/208Pb (1)		202Hg	204Pb	206Pb	207Pb	208Pb	204Pb/208Pb (1)	206Pb/208Pb (2)	207Pb/208Pb (3)		204Pb_corr_bl	204Pb_corr_bl Pb/208Pb (1)
1	1.75525e+09	0.000168873	0.0566913	0.973787	0.89534	2.13158	0.0265959	0.456838	0.420036		0.0566521	0.0265775		0.000155153	0.0566829	0.973659	0.895177	2.13123	0.0265963	0.456853	0.420028		0.0566468	0.0265794
2	1.75525e+09	0.000183842	0.0569454	0.975557	0.897088	2.13629	0.0266562	0.456659	0.419928		0.0569027	0.0266362		0.000170122	0.056937	0.975429	0.896925	2.13594	0.0266566	0.456674	0.41992		0.0568975	0.0266381
3	1.75525e+09	-0.000101476	0.0562977	0.962052	0.884262	2.10648	0.0267259	0.45671	0.419781		0.0563213	0.0267371		-0.000115196	0.0562893	0.961924	0.884099	2.10614	0.0267263	0.456725	0.419773		0.056316	0.026739
4	1.75525e+09	-2.85169e-05	0.0570273	0.97837	0.899283	2.14186	0.0266252	0.456786	0.419862		0.0570339	0.0266283		-4.22369e-05	0.0570188	0.978242	0.89912	2.14151	0.0266255	0.4568	0.419853		0.0570286	0.0266301
5	1.75525e+09	-8.93161e-05	0.0564411	0.967504	0.889189	2.11699	0.026661	0.457018	0.420025		0.0564618	0.0266708		-0.000103036	0.0564326	0.967376	0.889026	2.11665	0.0266614	0.457032	0.420016		0.0564566	0.0266727
6	1.75525e+09	-1.26149e-05	0.056089	0.955778	0.879292	2.09333	0.0267941	0.456582	0.420044		0.0560919	0.0267955		-2.6335e-05	0.0560805	0.95565	0.879129	2.09299	0.0267945	0.456597	0.420036		0.0560866	0.0267974
7	1.75525e+09	-0.00024083	0.0558928	0.959673	0.88185	2.09909	0.0266271	0.457184	0.42011		0.0559487	0.0266538		-0.00025455	0.0558843	0.959545	0.881687	2.09875	0.0266275	0.457199	0.420102		0.0559434	0.0266557
8	1.75525e+09	0.000111803	0.0562708	0.964603	0.88624	2.11074	0.0266593	0.456998	0.419872		0.0562448	0.026647		9.80833e-05	0.0562623	0.964475	0.886077	2.11039	0.0266596	0.457012	0.419863		0.0562395	0.0266488
9	1.75525e+09	-1.38985e-06	0.0562698	0.965565	0.887701	2.11395	0.0266184	0.456759	0.419926		0.0562701	0.0266185		-1.51099e-05	0.0562614	0.965437	0.887537	2.1136	0.0266187	0.456774	0.419917		0.0562649	0.0266204
10	1.75525e+09	-0.00026234	0.0558552	0.956044	0.879071	2.0928	0.0266893	0.456826	0.420046		0.0559162	0.0267184		-0.00027606	0.0558468	0.955916	0.878908	2.09245	0.0266897	0.45684	0.420037		0.0559109	0.0267203
11	1.75525e+09	-8.87324e-06	0.0564931	0.96612	0.888574	2.11599	0.0266982	0.456582	0.419934		0.0564951	0.0266992		-2.25933e-05	0.0564846	0.965992	0.888411	2.11564	0.0266986	0.456596	0.419926		0.0564899	0.0267011
12	1.75525e+09	0.000108061	0.0560976	0.959093	0.881955	2.09934	0.0267216	0.456855	0.420111		0.0560725	0.0267096		9.43412e-05	0.0560892	0.958965	0.881791	2.09899	0.026722	0.456869	0.420102		0.0560673	0.0267115
13	1.75525e+09	8.09312e-05	0.0572786	0.973915	0.895529	2.13302	0.0268533	0.45659	0.419841		0.0572598	0.0268445		6.72111e-05	0.0572702	0.973787	0.895365	2.13267	0.0268537	0.456605	0.419833		0.0572545	0.0268464
14	1.75525e+09	6.0936e-06	0.0563391	0.96416	0.886108	2.11049	0.0266948	0.456842	0.419859		0.0563377	0.0266941		-7.62646e-06	0.0563306	0.964032	0.885944	2.11014	0.0266952	0.456857	0.419851		0.0563324	0.026696
15	1.75525e+09	-2.66461e-05	0.0562285	0.958382	0.880727	2.09829	0.0267973	0.456744	0.419735		0.0562346	0.0268002		-4.03661e-05	0.05622	0.958254	0.880563	2.09794	0.0267977	0.456759	0.419727		0.0562294	0.0268021
16	1.75525e+09	6.97052e-05	0.0551967	0.946191	0.869821	2.07117	0.02665	0.456839	0.419967		0.0551805	0.0266422		5.59851e-05	0.0551882	0.946063	0.869658	2.07082	0.0266504	0.456854	0.419958		0.0551752	0.0266441
17	1.75525e+09	-0.000122053	0.0552842	0.945846	0.869695	2.07105	0.0266938	0.456699	0.41993		0.0553125	0.0267075		-0.000135773	0.0552757	0.945718	0.869532	2.0707	0.0266942	0.456714	0.419921		0.0553073	0.0267094
18	1.75525e+09	-3.50647e-05	0.055612	0.952473	0.875577	2.08476	0.0266755	0.456875	0.41999		0.0556201	0.0266794		-4.87847e-05	0.0556035	0.952345	0.875414	2.08441	0.0266759	0.456889	0.419982		0.0556149	0.0266813
19	1.75525e+09	-7.15444e-05	0.0552515	0.948273	0.870994	2.07487	0.0266289	0.457027	0.419782		0.0552681	0.0266369		-8.52645e-05	0.055243	0.948145	0.87083	2.07453	0.0266292	0.457042	0.419773		0.0552628	0.0266388
20	1.75525e+09	0.000167001	0.0555658	0.951518	0.874859	2.08219	0.0266862	0.456979	0.420163		0.055527	0.0266676		0.000153281	0.0555574	0.95139	0.874696	2.08184	0.0266866	0.456994	0.420154		0.0555218	0.0266695
***	Cup	L3	L1	C	H1	H2	L1 | H2	C | H2	H1 | H2
***	Info	tbdgy	tbdgy	tbdgy	tbdgy	tbdgy	tbdgy - St	tbdgy - St	tbdgy - St
***	Mean	-5.21767e-06	0.0561564	0.961245	0.883658	2.10421	0.0266876	0.45682	0.419947		0.0561576	0.0266882		-1.89377e-05	0.0561479	0.961117	0.883494	2.10387	0.026688	0.456834	0.419939		0.0561523	0.0266901
***	StdErr (%)	-532.54	0.233247	0.226024	0.227107	0.228153	0.0550187	0.00799193	0.00632407		0.00229909	0.000559174		-1.46724	0.00233282	0.00226054	0.00227149	0.00228191	0.00055027	7.99503e-05	6.32445e-05		0.0022993	0.00055924
***	StdErr (abs)	2.77862e-05	0.000130983	0.00217265	0.00200685	0.00480082	1.46832e-05	3.65087e-05	2.65578e-05
***	StdDev (%)	-2381.59	1.04311	1.01081	1.01565	1.02033	0.246051	0.035741	0.0282821
***	StdDev (abs)	0.000124264	0.000585774	0.00971637	0.00897491	0.0214699	6.56651e-05	0.000163272	0.00011877
***	Valid Values	20 (20)	20 (20)	20 (20)	20 (20)	20 (20)	20 (20)	20 (20)	20 (20)

## Sheet: z_14_03
											M(202Hg)	g/mol	201.971	8e-07	K(204Hg)	1	0.990347			M	Meng Wang et al 2021 Chinese Phys. C 45 030003
											M(204Hg)	g/mol	203.973	5e-07	K(204Pb)	1	1.01962			x	De Laeter et al., 2003 IUPAC, Pure and Applied Chemistry 75, 683–800
											M(206Pb)	g/mol	205.974	1.2e-06	K(206Pb)	1	1.00955			R_cert	NIST SRM 981 certificate of analysis
											M(208Pb)	g/mol	207.977	1.2e-06	K(207Pb)	1	1.00444
											x(202Hg)	mol/mol	0.2986	0.0026
											x(204Hg)	mol/mol	0.0687	0.0015
											R204,cert	mol/mol	0.0272321
											R206,cert	mol/mol	0.461233
											R207,cert	mol/mol	0.421862
											g	1	-1.02006
														blank correction
Cycle	Time	202Hg	204Pb	206Pb	207Pb	208Pb	204Pb/208Pb (1)	206Pb/208Pb (2)	207Pb/208Pb (3)		204Pb_corr	204Pb_corr Pb/208Pb (1)		202Hg	204Pb	206Pb	207Pb	208Pb	204Pb/208Pb (1)	206Pb/208Pb (2)	207Pb/208Pb (3)		204Pb_corr_bl	204Pb_corr_bl Pb/208Pb (1)
1	1.75525e+09	4.38099e-05	0.0588636	1.00981	0.928148	2.21038	0.0266305	0.456847	0.419904		0.0588534	0.0266259		3.00899e-05	0.0588551	1.00968	0.927984	2.21003	0.0266309	0.456861	0.419896		0.0588482	0.0266277
2	1.75525e+09	-0.000159165	0.0590324	1.01284	0.931588	2.21786	0.0266169	0.456673	0.42004		0.0590694	0.0266335		-0.000172885	0.059024	1.01271	0.931424	2.21751	0.0266172	0.456687	0.420032		0.0590641	0.0266353
3	1.75525e+09	0.000163557	0.0595429	1.01559	0.934184	2.22319	0.0267826	0.456815	0.420199		0.0595049	0.0267655		0.000149837	0.0595344	1.01546	0.934021	2.22285	0.026783	0.456829	0.420191		0.0594996	0.0267673
4	1.75525e+09	-1.04455e-05	0.0593634	1.0136	0.931254	2.21766	0.0267684	0.457059	0.419926		0.0593658	0.0267695		-2.41656e-05	0.0593549	1.01347	0.931091	2.21732	0.0267688	0.457073	0.419918		0.0593605	0.0267713
5	1.75525e+09	-4.22491e-05	0.0595236	1.01605	0.934334	2.22433	0.0267602	0.456791	0.420052		0.0595334	0.0267646		-5.59691e-05	0.0595151	1.01593	0.93417	2.22398	0.0267606	0.456805	0.420044		0.0595281	0.0267665
6	1.75525e+09	9.43263e-05	0.0593634	1.01598	0.93447	2.22435	0.026688	0.456752	0.420109		0.0593414	0.0266781		8.06063e-05	0.0593549	1.01585	0.934306	2.224	0.0266883	0.456766	0.420101		0.0593362	0.0266799
7	1.75525e+09	0.000102746	0.059372	1.01138	0.928898	2.21229	0.0268373	0.457163	0.41988		0.0593482	0.0268265		8.90259e-05	0.0593636	1.01125	0.928735	2.21195	0.0268377	0.457177	0.419872		0.0593429	0.0268284
8	1.75525e+09	0.000144845	0.0588752	1.00624	0.92461	2.20306	0.0267242	0.456746	0.419693		0.0588415	0.0267089		0.000131125	0.0588667	1.00611	0.924446	2.20272	0.0267246	0.45676	0.419685		0.0588363	0.0267108
9	1.75525e+09	-5.76844e-06	0.058581	1.00504	0.923715	2.19867	0.0266439	0.457112	0.420125		0.0585824	0.0266445		-1.94885e-05	0.0585726	1.00491	0.923552	2.19832	0.0266442	0.457126	0.420117		0.0585771	0.0266463
10	1.75525e+09	0.000158879	0.0590131	1.01021	0.928417	2.21064	0.026695	0.456977	0.419976		0.0589762	0.0266783		0.000145159	0.0590047	1.01008	0.928254	2.21029	0.0266954	0.456991	0.419968		0.0589709	0.0266801
11	1.75525e+09	-0.000222762	0.0592678	1.01322	0.932247	2.2195	0.0267032	0.456507	0.420025		0.0593196	0.0267265		-0.000236482	0.0592594	1.01309	0.932084	2.21916	0.0267036	0.456521	0.420017		0.0593143	0.0267283
12	1.75525e+09	0.000115843	0.0590613	1.01386	0.931729	2.21925	0.0266132	0.45685	0.41984		0.0590344	0.0266011		0.000102123	0.0590529	1.01374	0.931566	2.2189	0.0266136	0.456864	0.419832		0.0590292	0.0266029
13	1.75525e+09	-0.000101176	0.0580739	0.992243	0.912302	2.17205	0.0267369	0.456823	0.420018		0.0580974	0.0267477		-0.000114897	0.0580655	0.992116	0.912139	2.17171	0.0267373	0.456837	0.42001		0.0580922	0.0267496
14	1.75525e+09	-0.000191899	0.0586051	1.00154	0.920843	2.19146	0.0267424	0.457017	0.420195		0.0586497	0.0267628		-0.000205619	0.0585967	1.00141	0.92068	2.19112	0.0267428	0.457031	0.420187		0.0586444	0.0267646
15	1.75525e+09	1.20047e-05	0.0588539	1.00775	0.926587	2.20635	0.0266748	0.456749	0.419964		0.0588512	0.0266735		-1.7154e-06	0.0588455	1.00762	0.926424	2.206	0.0266752	0.456762	0.419956		0.0588459	0.0266754
16	1.75525e+09	8.26293e-06	0.0596143	1.01727	0.93563	2.22766	0.0267609	0.456654	0.420006		0.0596124	0.0267601		-5.45713e-06	0.0596059	1.01714	0.935467	2.22731	0.0267613	0.456667	0.419998		0.0596071	0.0267619
17	1.75525e+09	9.80684e-05	0.0596529	1.02197	0.939627	2.2376	0.0266594	0.456724	0.419927		0.0596301	0.0266492		8.43483e-05	0.0596445	1.02184	0.939464	2.23725	0.0266597	0.456738	0.419919		0.0596249	0.026651
18	1.75525e+09	-0.000231178	0.0595448	1.0207	0.938453	2.23371	0.0266573	0.456952	0.420132		0.0595985	0.0266814		-0.000244898	0.0595364	1.02057	0.938289	2.23336	0.0266577	0.456965	0.420124		0.0595933	0.0266832
19	1.75525e+09	0.000217822	0.0591279	1.01146	0.929201	2.21216	0.0267286	0.45723	0.420043		0.0590773	0.0267058		0.000204102	0.0591195	1.01134	0.929037	2.21181	0.026729	0.457244	0.420035		0.0590721	0.0267076
20	1.75525e+09	4.66163e-05	0.0587199	1.00252	0.921383	2.19408	0.0267628	0.456919	0.41994		0.0587091	0.0267579		3.28963e-05	0.0587114	1.00239	0.92122	2.19374	0.0267632	0.456933	0.419932		0.0587038	0.0267597
***	Cup	L3	L1	C	H1	H2	L1 | H2	C | H2	H1 | H2
***	Info	tbdgy	tbdgy	tbdgy	tbdgy	tbdgy	tbdgy - St	tbdgy - St	tbdgy - St
***	Mean	1.21069e-05	0.0591026	1.01096	0.929381	2.21281	0.0267093	0.456868	0.42		0.0590998	0.0267081		-1.61321e-06	0.0590942	1.01084	0.929218	2.21247	0.0267097	0.456882	0.419992		0.0590946	0.0267099
***	StdErr (%)	247.675	0.157132	0.154972	0.157661	0.157171	0.0512415	0.00902585	0.00657564		0.00155805	0.000505823		-18.5876	0.00157154	0.00154991	0.00157689	0.00157195	0.000512492	9.02828e-05	6.57695e-05		0.00155819	0.000505889
***	StdErr (abs)	2.99857e-05	9.28689e-05	0.00156671	0.00146527	0.00347789	1.36863e-05	4.12362e-05	2.76177e-05
***	StdDev (%)	1107.64	0.702714	0.693055	0.705082	0.702888	0.229159	0.0403648	0.0294071
***	StdDev (abs)	0.0001341	0.000415322	0.00700653	0.0065529	0.0155536	6.12068e-05	0.000184414	0.00012351
***	Valid Values	20 (20)	20 (20)	20 (20)	20 (20)	20 (20)	20 (20)	20 (20)	20 (20)

## Sheet: z_14_04
											M(202Hg)	g/mol	201.971	8e-07	K(204Hg)	1	0.990105			M	Meng Wang et al 2021 Chinese Phys. C 45 030003
											M(204Hg)	g/mol	203.973	5e-07	K(204Pb)	1	1.01931			x	De Laeter et al., 2003 IUPAC, Pure and Applied Chemistry 75, 683–800
											M(206Pb)	g/mol	205.974	1.2e-06	K(206Pb)	1	1.0098			R_cert	NIST SRM 981 certificate of analysis
											M(208Pb)	g/mol	207.977	1.2e-06	K(207Pb)	1	1.00446
											x(202Hg)	mol/mol	0.2986	0.0026
											x(204Hg)	mol/mol	0.0687	0.0015
											R204,cert	mol/mol	0.0272321
											R206,cert	mol/mol	0.461233
											R207,cert	mol/mol	0.421862
											g	1	-1.02006
														blank correction
Cycle	Time	202Hg	204Pb	206Pb	207Pb	208Pb	204Pb/208Pb (1)	206Pb/208Pb (2)	207Pb/208Pb (3)		204Pb_corr	204Pb_corr Pb/208Pb (1)		202Hg	204Pb	206Pb	207Pb	208Pb	204Pb/208Pb (1)	206Pb/208Pb (2)	207Pb/208Pb (3)		204Pb_corr_bl	204Pb_corr_bl Pb/208Pb (1)
1	1.75525e+09	0.00016518	0.0595456	1.01727	0.935987	2.22816	0.0267241	0.456551	0.420071		0.0595073	0.0267069		0.00015146	0.0595372	1.01714	0.935824	2.22782	0.0267245	0.456565	0.420063		0.059502	0.0267087
2	1.75525e+09	9.96913e-05	0.0603664	1.03129	0.948212	2.25765	0.0267386	0.4568	0.42		0.0603432	0.0267284		8.59712e-05	0.060358	1.03117	0.948049	2.2573	0.026739	0.456814	0.419992		0.060338	0.0267302
3	1.75525e+09	6.13355e-05	0.0597319	1.02624	0.943881	2.2465	0.0265889	0.456817	0.420157		0.0597177	0.0265826		4.76154e-05	0.0597235	1.02611	0.943717	2.24615	0.0265893	0.456831	0.420149		0.0597124	0.0265843
4	1.75525e+09	-8.08486e-05	0.0596933	1.01864	0.936578	2.23003	0.026768	0.456783	0.419984		0.0597121	0.0267764		-9.45686e-05	0.0596849	1.01851	0.936414	2.22968	0.0267683	0.456797	0.419976		0.0597069	0.0267782
5	1.75525e+09	6.88194e-05	0.059562	1.01795	0.936155	2.22902	0.0267212	0.456681	0.419986		0.0595461	0.026714		5.50994e-05	0.0595536	1.01782	0.935992	2.22867	0.0267216	0.456695	0.419978		0.0595408	0.0267158
6	1.75525e+09	-4.99814e-05	0.0599183	1.0199	0.937291	2.2319	0.0268463	0.456963	0.419952		0.0599299	0.0268515		-6.37015e-05	0.0599098	1.01977	0.937127	2.23155	0.0268467	0.456977	0.419944		0.0599246	0.0268534
7	1.75525e+09	4.54323e-05	0.0593835	1.01516	0.933145	2.22288	0.0267147	0.456685	0.419791		0.0593729	0.0267099		3.17122e-05	0.059375	1.01503	0.932982	2.22253	0.026715	0.456699	0.419783		0.0593677	0.0267117
8	1.75525e+09	9.87557e-05	0.059122	1.01076	0.929192	2.21183	0.0267299	0.456982	0.420102		0.059099	0.0267196		8.50357e-05	0.0591135	1.01064	0.929029	2.21148	0.0267303	0.456996	0.420094		0.0590938	0.0267214
9	1.75525e+09	-5.09168e-05	0.0595775	1.01757	0.935688	2.22797	0.0267407	0.456725	0.419973		0.0595893	0.026746		-6.46368e-05	0.059569	1.01744	0.935525	2.22762	0.0267411	0.456739	0.419965		0.0595841	0.0267478
10	1.75525e+09	5.47871e-05	0.0596093	1.0164	0.934557	2.22449	0.0267968	0.456913	0.420121		0.0595966	0.0267911		4.1067e-05	0.0596009	1.01627	0.934394	2.22415	0.0267972	0.456926	0.420113		0.0595913	0.0267929
11	1.75525e+09	0.000210089	0.0602022	1.02798	0.945136	2.25083	0.0267467	0.456713	0.419906		0.0601534	0.026725		0.000196369	0.0601937	1.02785	0.944972	2.25048	0.0267471	0.456726	0.419898		0.0601481	0.0267268
12	1.75525e+09	-0.00011265	0.0595215	1.01808	0.936075	2.2289	0.0267044	0.456765	0.419972		0.0595477	0.0267162		-0.00012637	0.0595131	1.01796	0.935911	2.22855	0.0267048	0.456779	0.419964		0.0595424	0.026718
13	1.75525e+09	1.26913e-05	0.0593266	1.01488	0.933762	2.2231	0.0266864	0.456514	0.420027		0.0593236	0.0266851		-1.02879e-06	0.0593181	1.01475	0.933599	2.22275	0.0266868	0.456528	0.420019		0.0593183	0.0266869
14	1.75525e+09	2.39166e-05	0.0583967	1.00222	0.921252	2.1942	0.0266142	0.45676	0.419858		0.0583912	0.0266116		1.01966e-05	0.0583883	1.00209	0.921088	2.19385	0.0266145	0.456774	0.41985		0.0583859	0.0266134
15	1.75525e+09	-0.000314659	0.0593208	1.01579	0.934431	2.22486	0.0266627	0.456562	0.419996		0.0593939	0.0266956		-0.000328379	0.0593123	1.01566	0.934267	2.22451	0.0266631	0.456576	0.419988		0.0593886	0.0266974
16	1.75525e+09	-6.86889e-05	0.0596827	1.01926	0.93704	2.23134	0.0267474	0.456791	0.419945		0.0596987	0.0267546		-8.24089e-05	0.0596743	1.01913	0.936877	2.231	0.0267478	0.456804	0.419937		0.0596934	0.0267564
17	1.75525e+09	6.50774e-05	0.0591567	1.01373	0.932054	2.21886	0.0266609	0.456871	0.420061		0.0591416	0.0266541		5.13574e-05	0.0591483	1.0136	0.931891	2.21851	0.0266613	0.456884	0.420053		0.0591363	0.0266559
18	1.75525e+09	-9.20727e-05	0.0591876	1.01164	0.930338	2.21537	0.0267167	0.456647	0.419946		0.059209	0.0267264		-0.000105793	0.0591792	1.01152	0.930174	2.21503	0.0267171	0.456661	0.419938		0.0592037	0.0267282
19	1.75525e+09	-6.12059e-05	0.0593661	1.01593	0.933652	2.22294	0.0267061	0.457023	0.420008		0.0593803	0.0267125		-7.4926e-05	0.0593577	1.01581	0.933489	2.22259	0.0267065	0.457036	0.42		0.0593751	0.0267143
20	1.75525e+09	-0.000167833	0.0596576	1.0202	0.938149	2.23417	0.0267023	0.456633	0.419909		0.0596966	0.0267198		-0.000181553	0.0596492	1.02007	0.937986	2.23383	0.0267027	0.456647	0.419901		0.0596913	0.0267216
***	Cup	L3	L1	C	H1	H2	L1 | H2	C | H2	H1 | H2
***	Info	tbdgy	tbdgy	tbdgy	tbdgy	tbdgy	tbdgy - St	tbdgy - St	tbdgy - St
***	Mean	-4.65401e-06	0.0595164	1.01754	0.935629	2.22775	0.0267159	0.456759	0.419988		0.0595175	0.0267164		-1.83741e-05	0.059508	1.01742	0.935465	2.2274	0.0267162	0.456773	0.41998		0.0595122	0.0267182
***	StdErr (%)	-580.803	0.155537	0.137208	0.138106	0.137329	0.0482904	0.0070033	0.00469271		0.00153826	0.000487457		-1.47113	0.00155559	0.00137225	0.00138131	0.0013735	0.000482968	7.00437e-05	4.69393e-05		0.0015384	0.000487483
***	StdErr (abs)	2.70306e-05	9.25703e-05	0.00139615	0.00129216	0.00305934	1.29012e-05	3.19882e-05	1.97088e-05
***	StdDev (%)	-2597.43	0.695584	0.613614	0.617631	0.614152	0.215961	0.0313197	0.0209864
***	StdDev (abs)	0.000120885	0.000413987	0.00624379	0.00577873	0.0136818	5.76959e-05	0.000143056	8.81405e-05
***	Valid Values	20 (20)	20 (20)	20 (20)	20 (20)	20 (20)	20 (20)	20 (20)	20 (20)

## Sheet: z_14c_01
											M(202Hg)	g/mol	201.971	8e-07	K(204Hg)	1	0.990871			M	Meng Wang et al 2021 Chinese Phys. C 45 030003
											M(204Hg)	g/mol	203.973	5e-07	K(204Pb)	1	1.01988			x	De Laeter et al., 2003 IUPAC, Pure and Applied Chemistry 75, 683–800
											M(206Pb)	g/mol	205.974	1.2e-06	K(206Pb)	1	1.00903			R_cert	NIST SRM 981 certificate of analysis
											M(208Pb)	g/mol	207.977	1.2e-06	K(207Pb)	1	1.00483
											x(202Hg)	mol/mol	0.2986	0.0026
											x(204Hg)	mol/mol	0.0687	0.0015
											R204,cert	mol/mol	0.0272321
											R206,cert	mol/mol	0.461233
											R207,cert	mol/mol	0.421862
											g	1	-1.02006
														blank correction
Cycle	Time	202Hg	204Pb	206Pb	207Pb	208Pb	204Pb/208Pb (1)	206Pb/208Pb (2)	207Pb/208Pb (3)		204Pb_corr	204Pb_corr Pb/208Pb (1)		202Hg	204Pb	206Pb	207Pb	208Pb	204Pb/208Pb (1)	206Pb/208Pb (2)	207Pb/208Pb (3)		204Pb_corr_bl	204Pb_corr_bl Pb/208Pb (1)
1	1.75524e+09	-9.42397e-05	0.039242	0.669079	0.614691	1.46288	0.0268252	0.457372	0.420193		0.0392639	0.0268402		-0.00010796	0.0392336	0.668951	0.614527	1.46253	0.0268258	0.457393	0.420181		0.0392586	0.026843
2	1.75524e+09	-6.6179e-05	0.0389123	0.666961	0.612489	1.45931	0.0266649	0.457038	0.419711		0.0389277	0.0266754		-7.98991e-05	0.0389039	0.666833	0.612325	1.45896	0.0266654	0.457059	0.419698		0.0389224	0.0266781
3	1.75524e+09	0.000217278	0.0388885	0.669604	0.614944	1.46512	0.0265429	0.457031	0.419723		0.0388381	0.0265085		0.000203558	0.0388801	0.669476	0.61478	1.46477	0.0265434	0.457052	0.41971		0.0388328	0.0265112
4	1.75524e+09	-0.000180287	0.0390553	0.665709	0.610989	1.45624	0.0268192	0.457141	0.419566		0.0390971	0.026848		-0.000194007	0.0390468	0.665581	0.610826	1.45589	0.0268198	0.457162	0.419553		0.0390919	0.0268507
5	1.75524e+09	-0.000112946	0.0391467	0.664338	0.610379	1.45379	0.0269275	0.456972	0.419855		0.039173	0.0269455		-0.000126666	0.0391383	0.66421	0.610215	1.45344	0.0269281	0.456993	0.419843		0.0391677	0.0269483
6	1.75524e+09	-7.17912e-05	0.037764	0.648885	0.595586	1.41897	0.0266136	0.457291	0.41973		0.0377807	0.0266253		-8.55113e-05	0.0377556	0.648757	0.595422	1.41863	0.0266142	0.457313	0.419717		0.0377754	0.0266282
7	1.75524e+09	4.04587e-05	0.0382285	0.652166	0.598847	1.42674	0.0267943	0.457102	0.41973		0.0382191	0.0267877		2.67386e-05	0.0382201	0.652038	0.598683	1.42639	0.0267949	0.457123	0.419718		0.0382139	0.0267905
8	1.75524e+09	-7.011e-07	0.03808	0.655065	0.601946	1.43375	0.0265597	0.45689	0.419841		0.0380802	0.0265598		-1.44212e-05	0.0380716	0.654937	0.601783	1.4334	0.0265603	0.456911	0.419828		0.0380749	0.0265626
9	1.75524e+09	0.000127461	0.0385228	0.659867	0.606048	1.44345	0.026688	0.457146	0.419861		0.0384932	0.0266675		0.000113741	0.0385143	0.659739	0.605885	1.4431	0.0266885	0.457167	0.419849		0.0384879	0.0266702
10	1.75524e+09	2.73622e-05	0.0385732	0.661286	0.607281	1.44591	0.0266774	0.457349	0.419998		0.0385669	0.026673		1.36421e-05	0.0385648	0.661158	0.607117	1.44557	0.026678	0.45737	0.419986		0.0385616	0.0266758
11	1.75524e+09	9.58869e-06	0.0386999	0.662872	0.609094	1.45109	0.0266696	0.456811	0.41975		0.0386977	0.0266681		-4.13137e-06	0.0386915	0.662744	0.608931	1.45074	0.0266701	0.456832	0.419738		0.0386924	0.0266708
12	1.75524e+09	-0.000131653	0.0386094	0.659851	0.606091	1.44405	0.026737	0.456946	0.419717		0.03864	0.0267581		-0.000145373	0.038601	0.659723	0.605928	1.4437	0.0267376	0.456967	0.419705		0.0386347	0.0267609
13	1.75524e+09	-0.000126976	0.0389571	0.666116	0.611532	1.45711	0.0267358	0.457148	0.419688		0.0389866	0.0267561		-0.000140696	0.0389487	0.665988	0.611368	1.45676	0.0267364	0.457169	0.419675		0.0389813	0.0267588
14	1.75524e+09	-7.74034e-05	0.0387942	0.66157	0.608184	1.44684	0.026813	0.45725	0.420352		0.0388122	0.0268254		-9.11235e-05	0.0387858	0.661442	0.608021	1.4465	0.0268136	0.457271	0.42034		0.0388069	0.0268282
15	1.75524e+09	0.00012559	0.0385361	0.666317	0.612022	1.45822	0.0264269	0.45694	0.419706		0.0385069	0.0264069		0.00011187	0.0385276	0.666189	0.611858	1.45787	0.0264274	0.456961	0.419694		0.0385017	0.0264096
16	1.75524e+09	-1.94095e-05	0.0383885	0.661587	0.60826	1.44772	0.0265164	0.456985	0.42015		0.038393	0.0265196		-3.31296e-05	0.03838	0.661459	0.608097	1.44738	0.026517	0.457006	0.420137		0.0383877	0.0265223
17	1.75524e+09	4.7007e-05	0.038799	0.663713	0.609438	1.45164	0.0267277	0.457217	0.419828		0.0387881	0.0267202		3.32869e-05	0.0387905	0.663585	0.609275	1.45129	0.0267283	0.457238	0.419816		0.0387828	0.026723
18	1.75524e+09	-0.000102658	0.0385932	0.660038	0.605825	1.44338	0.0267382	0.457288	0.419728		0.0386171	0.0267547		-0.000116378	0.0385848	0.65991	0.605662	1.44303	0.0267388	0.457309	0.419716		0.0386118	0.0267575
19	1.75524e+09	0.000105008	0.0386751	0.662485	0.608424	1.44925	0.0266863	0.457122	0.41982		0.0386508	0.0266695		9.12881e-05	0.0386667	0.662357	0.60826	1.4489	0.0266869	0.457144	0.419808		0.0386455	0.0266722
20	1.75524e+09	3.57813e-05	0.0391458	0.667119	0.612672	1.45956	0.0268203	0.45707	0.419766		0.0391375	0.0268146		2.20613e-05	0.0391373	0.666991	0.612509	1.45921	0.0268209	0.457091	0.419754		0.0391322	0.0268174
***	Cup	L3	L1	C	H1	H2	L1 | H2	C | H2	H1 | H2
***	Info	tbdgy	tbdgy	tbdgy	tbdgy	tbdgy	tbdgy - St	tbdgy - St	tbdgy - St
***	Mean	-1.24354e-05	0.0386806	0.662231	0.608237	1.44875	0.0266992	0.457105	0.419836		0.0386835	0.0267012		-2.61555e-05	0.0386721	0.662103	0.608074	1.4484	0.0266998	0.457126	0.419823		0.0386782	0.026704
***	StdErr (%)	-187.762	0.215914	0.18119	0.182428	0.181891	0.102705	0.00766664	0.0103747		0.00218878	0.00110864		-0.892702	0.00215961	0.00181225	0.00182478	0.00181934	0.00102727	7.66912e-05	0.000103776		0.00218908	0.00110878
***	StdErr (abs)	2.33491e-05	8.35169e-05	0.0011999	0.0011096	0.00263514	2.74213e-05	3.50446e-05	4.35567e-05
***	StdDev (%)	-839.699	0.965598	0.810306	0.815845	0.813439	0.459309	0.0342863	0.0463971
***	StdDev (abs)	0.00010442	0.000373499	0.0053661	0.00496227	0.0117847	0.000122632	0.000156724	0.000194791
***	Valid Values	20 (20)	20 (20)	20 (20)	20 (20)	20 (20)	20 (20)	20 (20)	20 (20)

## Sheet: z_14c_02
											M(202Hg)	g/mol	201.971	8e-07	K(204Hg)	1	0.990763			M	Meng Wang et al 2021 Chinese Phys. C 45 030003
											M(204Hg)	g/mol	203.973	5e-07	K(204Pb)	1	1.0212			x	De Laeter et al., 2003 IUPAC, Pure and Applied Chemistry 75, 683–800
											M(206Pb)	g/mol	205.974	1.2e-06	K(206Pb)	1	1.00914			R_cert	NIST SRM 981 certificate of analysis
											M(208Pb)	g/mol	207.977	1.2e-06	K(207Pb)	1	1.00498
											x(202Hg)	mol/mol	0.2986	0.0026
											x(204Hg)	mol/mol	0.0687	0.0015
											R204,cert	mol/mol	0.0272321
											R206,cert	mol/mol	0.461233
											R207,cert	mol/mol	0.421862
											g	1	-1.02006
														blank correction
Cycle	Time	202Hg	204Pb	206Pb	207Pb	208Pb	204Pb/208Pb (1)	206Pb/208Pb (2)	207Pb/208Pb (3)		204Pb_corr	204Pb_corr Pb/208Pb (1)		202Hg	204Pb	206Pb	207Pb	208Pb	204Pb/208Pb (1)	206Pb/208Pb (2)	207Pb/208Pb (3)		204Pb_corr_bl	204Pb_corr_bl Pb/208Pb (1)
1	1.75525e+09	0.000106273	0.0383115	0.657219	0.604114	1.4384	0.0266348	0.45691	0.41999		0.0382868	0.0266176		9.25528e-05	0.038303	0.657091	0.60395	1.43805	0.0266353	0.456931	0.419978		0.0382815	0.0266204
2	1.75525e+09	-0.000149093	0.0386152	0.661666	0.60752	1.44789	0.02667	0.456986	0.41959		0.0386499	0.0266939		-0.000162813	0.0386068	0.661538	0.607357	1.44754	0.0266706	0.457008	0.419578		0.0386446	0.0266967
3	1.75525e+09	-0.000338003	0.0384838	0.663669	0.609217	1.45212	0.0265019	0.457036	0.419537		0.0385623	0.0265559		-0.000351723	0.0384754	0.663541	0.609054	1.45177	0.0265024	0.457057	0.419525		0.038557	0.0265586
4	1.75525e+09	-0.000180892	0.03888	0.668321	0.613491	1.46155	0.026602	0.457269	0.419754		0.038922	0.0266307		-0.000194612	0.0388716	0.668193	0.613327	1.4612	0.0266025	0.45729	0.419742		0.0389168	0.0266334
5	1.75525e+09	8.00784e-05	0.0380792	0.652422	0.599321	1.42741	0.0266771	0.457067	0.419866		0.0380606	0.0266641		6.63584e-05	0.0380707	0.652294	0.599158	1.42706	0.0266777	0.457089	0.419854		0.0380553	0.0266669
6	1.75525e+09	-3.96587e-05	0.0389629	0.665423	0.611144	1.45592	0.0267617	0.457045	0.419764		0.0389721	0.026768		-5.33787e-05	0.0389545	0.665295	0.610981	1.45558	0.0267622	0.457066	0.419752		0.0389669	0.0267708
7	1.75525e+09	-6.11724e-05	0.0382553	0.652424	0.599283	1.4278	0.0267931	0.456942	0.419724		0.0382695	0.0268031		-7.48925e-05	0.0382468	0.652296	0.59912	1.42746	0.0267937	0.456964	0.419712		0.0382642	0.0268059
8	1.75525e+09	-8.64271e-05	0.0384733	0.659049	0.605758	1.44247	0.0266718	0.456888	0.419944		0.0384934	0.0266857		-0.000100147	0.0384649	0.658921	0.605594	1.44213	0.0266724	0.45691	0.419932		0.0384881	0.0266885
9	1.75525e+09	-2.56277e-05	0.03846	0.661702	0.607338	1.44787	0.0265632	0.457018	0.419471		0.0384659	0.0265673		-3.93478e-05	0.0384515	0.661574	0.607175	1.44752	0.0265637	0.457039	0.419458		0.0384607	0.02657
10	1.75525e+09	-2.46923e-05	0.0387191	0.664763	0.610809	1.45495	0.0266119	0.456897	0.419815		0.0387248	0.0266159		-3.84124e-05	0.0387106	0.664635	0.610646	1.4546	0.0266125	0.456918	0.419802		0.0387195	0.0266186
11	1.75525e+09	0.000108144	0.0383362	0.654636	0.601283	1.43193	0.0267725	0.457172	0.419912		0.0383111	0.0267549		9.44238e-05	0.0383278	0.654508	0.601119	1.43158	0.0267731	0.457193	0.4199		0.0383058	0.0267578
12	1.75525e+09	0.000190474	0.0383895	0.657972	0.604205	1.44026	0.0266546	0.456843	0.419511		0.0383453	0.0266239		0.000176754	0.0383811	0.657844	0.604041	1.43991	0.0266551	0.456864	0.419499		0.03834	0.0266266
13	1.75525e+09	-4.90125e-05	0.0383743	0.660446	0.606876	1.44491	0.0265582	0.457084	0.420009		0.0383857	0.0265661		-6.27326e-05	0.0383658	0.660318	0.606713	1.44457	0.0265587	0.457105	0.419997		0.0383804	0.0265688
14	1.75525e+09	-5.93017e-05	0.0381277	0.655422	0.602361	1.43376	0.0265927	0.457134	0.420125		0.0381415	0.0266023		-7.30217e-05	0.0381193	0.655294	0.602197	1.43342	0.0265933	0.457155	0.420113		0.0381362	0.0266051
15	1.75525e+09	-5.08833e-05	0.0385552	0.662984	0.60871	1.44991	0.0265915	0.45726	0.419827		0.038567	0.0265997		-6.46034e-05	0.0385468	0.662856	0.608546	1.44956	0.0265921	0.457281	0.419815		0.0385618	0.0266024
16	1.75525e+09	-9.01684e-05	0.0381344	0.652728	0.599402	1.42771	0.0267101	0.457184	0.419834		0.0381553	0.0267248		-0.000103888	0.0381259	0.6526	0.599239	1.42737	0.0267107	0.457206	0.419821		0.03815	0.0267276
17	1.75525e+09	-3.12401e-05	0.03757	0.640388	0.587969	1.40014	0.0268331	0.457376	0.419937		0.0375773	0.0268383		-4.49602e-05	0.0375616	0.64026	0.587805	1.39979	0.0268337	0.457398	0.419925		0.037572	0.0268412
18	1.75525e+09	-6.86553e-05	0.037707	0.647619	0.594787	1.41687	0.0266129	0.457078	0.41979		0.037723	0.0266242		-8.23754e-05	0.0376986	0.647491	0.594624	1.41652	0.0266135	0.457099	0.419777		0.0377177	0.026627
19	1.75525e+09	-8.45564e-05	0.0383153	0.655794	0.602229	1.43526	0.0266957	0.456917	0.419596		0.0383349	0.0267094		-9.82764e-05	0.0383068	0.655666	0.602066	1.43491	0.0266963	0.456938	0.419584		0.0383296	0.0267122
20	1.75525e+09	-1.81445e-05	0.0383676	0.65705	0.603054	1.43769	0.0266871	0.457019	0.419462		0.0383718	0.02669		-3.18646e-05	0.0383592	0.656922	0.602891	1.43734	0.0266876	0.45704	0.419449		0.0383666	0.0266928
***	Cup	L3	L1	C	H1	H2	L1 | H2	C | H2	H1 | H2
***	Info	tbdgy	tbdgy	tbdgy	tbdgy	tbdgy	tbdgy - St	tbdgy - St	tbdgy - St
***	Mean	-4.3628e-05	0.0383559	0.657585	0.603944	1.43874	0.0266598	0.457056	0.419773		0.038366	0.0266668		-5.73481e-05	0.0383474	0.657457	0.60378	1.43839	0.0266604	0.457078	0.419761		0.0383607	0.0266696
***	StdErr (%)	-57.6836	0.196345	0.224393	0.223606	0.226236	0.0715445	0.00698504	0.0102228		0.00199902	0.000676809		-0.438833	0.00196388	0.00224437	0.00223666	0.0022629	0.00071563	6.98956e-05	0.000102237		0.0019993	0.000677027
***	StdErr (abs)	2.51662e-05	7.53099e-05	0.00147558	0.00135045	0.00325494	1.90736e-05	3.19255e-05	4.29124e-05
***	StdDev (%)	-257.969	0.878083	1.00352	0.999994	1.01176	0.319957	0.031238	0.0457176
***	StdDev (abs)	0.000112547	0.000336796	0.00659898	0.0060394	0.0145566	8.52998e-05	0.000142775	0.00019191
***	Valid Values	20 (20)	20 (20)	20 (20)	20 (20)	20 (20)	20 (20)	20 (20)	20 (20)

## Sheet: z_14c_03
											M(202Hg)	g/mol	201.971	8e-07	K(204Hg)	1	0.990754			M	Meng Wang et al 2021 Chinese Phys. C 45 030003
											M(204Hg)	g/mol	203.973	5e-07	K(204Pb)	1	1.02196			x	De Laeter et al., 2003 IUPAC, Pure and Applied Chemistry 75, 683–800
											M(206Pb)	g/mol	205.974	1.2e-06	K(206Pb)	1	1.00915			R_cert	NIST SRM 981 certificate of analysis
											M(208Pb)	g/mol	207.977	1.2e-06	K(207Pb)	1	1.00509
											x(202Hg)	mol/mol	0.2986	0.0026
											x(204Hg)	mol/mol	0.0687	0.0015
											R204,cert	mol/mol	0.0272321
											R206,cert	mol/mol	0.461233
											R207,cert	mol/mol	0.421862
											g	1	-1.02006
														blank correction
Cycle	Time	202Hg	204Pb	206Pb	207Pb	208Pb	204Pb/208Pb (1)	206Pb/208Pb (2)	207Pb/208Pb (3)		204Pb_corr	204Pb_corr Pb/208Pb (1)		202Hg	204Pb	206Pb	207Pb	208Pb	204Pb/208Pb (1)	206Pb/208Pb (2)	207Pb/208Pb (3)		204Pb_corr_bl	204Pb_corr_bl Pb/208Pb (1)
1	1.75525e+09	1.93893e-05	0.0404243	0.691446	0.635435	1.51216	0.0267328	0.457257	0.420216		0.0404198	0.0267298		5.66924e-06	0.0404158	0.691318	0.635271	1.51181	0.0267333	0.457277	0.420205		0.0404145	0.0267325
2	1.75525e+09	-1.14797e-05	0.0403088	0.692612	0.636088	1.51486	0.026609	0.457212	0.419899		0.0403115	0.0266107		-2.51998e-05	0.0403004	0.692484	0.635925	1.51451	0.0266095	0.457233	0.419888		0.0403062	0.0266134
3	1.75525e+09	9.42273e-05	0.0406457	0.692204	0.635474	1.51493	0.0268301	0.456923	0.419476		0.0406238	0.0268157		8.05072e-05	0.0406372	0.692076	0.635311	1.51458	0.0268307	0.456943	0.419464		0.0406185	0.0268184
4	1.75525e+09	0.000138197	0.0408432	0.699101	0.642323	1.52998	0.0266952	0.456934	0.419824		0.0408111	0.0266743		0.000124477	0.0408348	0.698973	0.642159	1.52964	0.0266958	0.456954	0.419812		0.0408059	0.0266769
5	1.75525e+09	9.32917e-05	0.0406371	0.695874	0.639147	1.52218	0.0266966	0.457155	0.419888		0.0406154	0.0266823		7.95717e-05	0.0406286	0.695746	0.638984	1.52184	0.0266971	0.457176	0.419877		0.0406102	0.026685
6	1.75525e+09	0.000101711	0.0406609	0.695464	0.638095	1.52103	0.0267325	0.457232	0.419515		0.0406373	0.026717		8.79913e-05	0.0406525	0.695336	0.637931	1.52068	0.0267331	0.457252	0.419503		0.0406321	0.0267196
7	1.75525e+09	6.24204e-05	0.0403842	0.693697	0.636861	1.51812	0.0266015	0.456945	0.419507		0.0403697	0.0265919		4.87004e-05	0.0403758	0.693569	0.636697	1.51777	0.026602	0.456965	0.419495		0.0403644	0.0265945
8	1.75525e+09	9.23562e-05	0.0402163	0.691771	0.634932	1.51344	0.0265728	0.457085	0.419529		0.0401949	0.0265586		7.86362e-05	0.0402078	0.691643	0.634768	1.51309	0.0265733	0.457106	0.419517		0.0401896	0.0265612
9	1.75525e+09	-6.47966e-05	0.04043	0.690024	0.633487	1.50984	0.0267777	0.457019	0.419573		0.0404451	0.0267877		-7.85167e-05	0.0404216	0.689896	0.633324	1.50949	0.0267783	0.457039	0.419561		0.0404398	0.0267904
10	1.75525e+09	0.000140068	0.0402878	0.690213	0.63377	1.50918	0.0266952	0.457343	0.419943		0.0402553	0.0266736		0.000126348	0.0402794	0.690085	0.633606	1.50883	0.0266957	0.457364	0.419932		0.0402501	0.0266763
11	1.75525e+09	0.000294447	0.0402468	0.68874	0.632551	1.5072	0.0267031	0.456968	0.419688		0.0401784	0.0266578		0.000280727	0.0402384	0.688612	0.632388	1.50685	0.0267037	0.456988	0.419676		0.0401732	0.0266604
12	1.75525e+09	9.89048e-05	0.0404825	0.695265	0.638876	1.52161	0.026605	0.456926	0.419867		0.0404595	0.0265899		8.51848e-05	0.040474	0.695137	0.638713	1.52127	0.0266055	0.456946	0.419856		0.0404543	0.0265925
13	1.75525e+09	0.000332811	0.0403012	0.691793	0.635324	1.51444	0.0266112	0.456797	0.41951		0.0402239	0.0265602		0.000319091	0.0402928	0.691665	0.635161	1.5141	0.0266118	0.456817	0.419499		0.0402187	0.0265628
14	1.75525e+09	-9.94043e-05	0.0403336	0.692543	0.63618	1.51518	0.0266197	0.457069	0.419871		0.0403567	0.0266349		-0.000113124	0.0403252	0.692415	0.636016	1.51483	0.0266202	0.45709	0.419859		0.0403515	0.0266376
15	1.75525e+09	-6.5732e-05	0.0404281	0.695994	0.639113	1.52305	0.0265442	0.456973	0.419627		0.0404434	0.0265542		-7.9452e-05	0.0404196	0.695866	0.63895	1.5227	0.0265447	0.456994	0.419616		0.0404381	0.0265568
16	1.75525e+09	-1.8963e-05	0.0402249	0.690375	0.634026	1.51075	0.0266258	0.456976	0.419678		0.0402293	0.0266288		-3.2683e-05	0.0402164	0.690247	0.633863	1.5104	0.0266264	0.456997	0.419666		0.040224	0.0266314
17	1.75525e+09	-3.48647e-05	0.0404376	0.694435	0.637317	1.51963	0.0266101	0.456976	0.419389		0.0404457	0.0266155		-4.85847e-05	0.0404292	0.694307	0.637154	1.51929	0.0266107	0.456996	0.419378		0.0404405	0.0266181
18	1.75525e+09	-1.33505e-05	0.0403375	0.693696	0.637296	1.51832	0.0265672	0.456884	0.419738		0.0403406	0.0265692		-2.70706e-05	0.040329	0.693568	0.637133	1.51797	0.0265677	0.456904	0.419727		0.0403353	0.0265719
19	1.75525e+09	0.000106389	0.0403604	0.691248	0.634741	1.51196	0.0266941	0.457188	0.419815		0.0403357	0.0266778		9.26689e-05	0.0403519	0.69112	0.634578	1.51161	0.0266947	0.457208	0.419803		0.0403304	0.0266804
20	1.75525e+09	0.000183105	0.0400723	0.687694	0.631727	1.50419	0.0266404	0.457184	0.419977		0.0400297	0.0266121		0.000169385	0.0400638	0.687566	0.631564	1.50385	0.0266409	0.457205	0.419966		0.0400245	0.0266147
***	Cup	L3	L1	C	H1	H2	L1 | H2	C | H2	H1 | H2
***	Info	tbdgy	tbdgy	tbdgy	tbdgy	tbdgy	tbdgy - St	tbdgy - St	tbdgy - St
***	Mean	7.24364e-05	0.0404032	0.692709	0.636138	1.5156	0.0266582	0.457052	0.419727		0.0403863	0.0266471		5.87163e-05	0.0403947	0.692581	0.635975	1.51526	0.0266587	0.457073	0.419715		0.0403811	0.0266497
***	StdErr (%)	35.1881	0.100575	0.0895597	0.0902177	0.0916002	0.0629091	0.00718888	0.0113104		0.00102854	0.00062107		0.434105	0.00100596	0.000895762	0.000902409	0.000916212	0.000629226	7.19151e-05	0.000113128		0.00102867	0.000621164
***	StdErr (abs)	2.5489e-05	4.06357e-05	0.000620388	0.000573909	0.00138829	1.67704e-05	3.2857e-05	4.74726e-05
***	StdDev (%)	157.366	0.449787	0.400523	0.403466	0.409649	0.281338	0.0321497	0.0505815
***	StdDev (abs)	0.00011399	0.000181728	0.00277446	0.0025666	0.00620864	7.49997e-05	0.000146941	0.000212304
***	Valid Values	20 (20)	20 (20)	20 (20)	20 (20)	20 (20)	20 (20)	20 (20)	20 (20)

[truncated: 21 more sheets: z_14c_04, z_14dc_01, z_14dc_02, z_14dc_03, z_14dc_04, z_135_01, z_135_02, z_135_03, z_135_04, z_135c_01, z_135c_02, z_135c_03, z_135c_04, z_135dc_01, z_135dc_02, z_135dc_03, z_135dc_04, z_ref_01, z_ref_02, z_ref_03 …]
