# Supplementary material
Source: Royal Society of Chemistry journal article supplement (doi:10.1039/d6ja00106h)
Supplement: d6ja00106h3.xlsx [file d6ja00106h3.xlsx]

## Sheet: Summary
																									NIST SRM 981
blank	202-Hg	204-Pb	206-Pb	207-Pb	208-Pb																					204/208	206/208	207/208		204-Pb and 204/208 are 204-Hg corrected
blk-01	-5.71313e-05	-2.09093e-05	9.88562e-07	2.97888e-05	3.98688e-05																				R_z	0.0272321	0.461233	0.421862
blk-02	4.48314e-05	8.92095e-06	9.3315e-05	5.48892e-05	0.000177953																				u(R_z)	9.9e-06	8.51e-05	0.000109
	-6.14996e-06	-5.99416e-06	4.71518e-05	4.2339e-05	0.000108911			calculated
	-11.7234	-3.51895	1.38456	0.419203	0.896517			calculated with GUM Workbench Pro
w/o blank corr	202-Hg	204-Pb	206-Pb	207-Pb	208-Pb	204/208	K_204/208	u(K_204/208)	K_204/208_av	plus u_K	min u_K	206/208	K_206/208	u(K_206/208)	K_206/208_av	plus u_K	min u_K	207/208	K_207/208	u(K_207/208)	K_207/208_av	plus u_K	min u_K		blank corr	202-Hg	204-Pb	206-Pb	207-Pb	208-Pb	204/208	K_204/208	u(K_204/208)	K_204/208_av	plus u_K	min u_K	206/208	K_206/208	u(K_206/208)	K_206/208_av	plus u_K	min u_K	207/208	K_207/208	u(K_207/208)	K_207/208_av	plus u_K	min u_K
z_ref_01	4.03581e-05	0.0932597	1.59705	1.46827	3.49608	0.0266729	1.02097	0.00049	1.02037	1.02087	1.01987	0.456812	1.00968	0.000195	1.00971	1.00991	1.00951	0.419977	1.00449	0.000267	1.00449	1.00475	1.00422		z_ref_01	4.6508e-05	0.0932549	1.59701	1.46823	3.49597	0.026675	1.02089	0.00049	1.02029	1.02079	1.01979	0.456813	1.00968	0.000195	1.00971	1.00991	1.00951	0.419978	1.00449	0.000267	1.00449	1.00475	1.00422
z_ref_02	1.26719e-05	0.0931161	1.59373	1.46532	3.48876	0.0266895	1.02033	0.000523	1.02037	1.02087	1.01987	0.456819	1.00966	0.000199	1.00971	1.00991	1.00951	0.420012	1.00441	0.000264	1.00449	1.00475	1.00422		z_ref_02	1.88218e-05	0.0931177	1.59368	1.46528	3.48865	0.0266916	1.02025	0.000523	1.02029	1.02079	1.01979	0.456819	1.00966	0.000199	1.00971	1.00991	1.00951	0.420013	1.0044	0.000264	1.00449	1.00475	1.00422
z_ref_03	5.5976e-05	0.0945228	1.61673	1.48641	3.53917	0.026704	1.01978	0.00052	1.02037	1.02087	1.01987	0.456812	1.00968	0.000199	1.00971	1.00991	1.00951	0.419989	1.00446	0.00027	1.00449	1.00475	1.00422		z_ref_03	6.21259e-05	0.0945143	1.61668	1.48637	3.53906	0.0267061	1.0197	0.00052	1.02029	1.02079	1.01979	0.456813	1.00968	0.000199	1.00971	1.00991	1.00951	0.41999	1.00446	0.00027	1.00449	1.00475	1.00422
z_ref_04	1.94699e-05	0.0954875	1.63416	1.50244	3.57781	0.0266876	1.0204	0.000481	1.02037	1.02087	1.01987	0.456749	1.00982	0.000197	1.00971	1.00991	1.00951	0.419933	1.0046	0.000266	1.00449	1.00475	1.00422		z_ref_04	2.56198e-05	0.0954876	1.63411	1.50239	3.5777	0.0266897	1.02032	0.000481	1.02029	1.02079	1.01979	0.456749	1.00982	0.000197	1.00971	1.00991	1.00951	0.419934	1.00459	0.000266	1.00449	1.00475	1.00422
z_ref	3.21189e-05	0.0940965	1.61042	1.48061	3.52545	0.0266885	1.02037	0.000503833				0.456798	1.00971	0.000197507				0.419978	1.00449	0.000266759						3.82689e-05	0.0940936	1.61037	1.48057	3.52534	0.0266906	1.02029	0.000503833				0.456799	1.00971	0.000197507				0.419979	1.00449	0.000266759
	0.616225	0.011926	0.0116756	0.0116728	0.0117393	0.000476615		0.000493774				7.21705e-05		0.000195608				7.93806e-05		0.000265567						0.517195	0.011923	0.0116759	0.0116731	0.0117397	0.000476245		0.000493813				7.21891e-05		0.000195608				7.94053e-05		0.000265568
z_14_01	2.41826e-05	0.0578494	0.990049	0.910258	2.16758	0.0266859	1.02047	0.000786	1.02005	1.0207	1.0194	0.456753	1.00981	0.000194	1.00969	1.00988	1.00949	0.419942	1.00457	0.000271	1.00448	1.00475	1.00421		z_14_01	3.03326e-05	0.0578484	0.990002	0.910216	2.16747	0.0266893	1.02034	0.000786	1.01994	1.02058	1.01929	0.456754	1.00981	0.000194	1.00969	1.00989	1.00949	0.419943	1.00457	0.000271	1.00448	1.00475	1.00421
z_14_02	-1.64116e-05	0.0576377	0.986496	0.907004	2.15936	0.0266938	1.02017	0.000565	1.02005	1.0207	1.0194	0.456846	1.0096	0.0002	1.00969	1.00988	1.00949	0.420034	1.00435	0.000266	1.00448	1.00475	1.00421		z_14_02	3.25201e-06	0.057643	0.986449	0.906962	2.15925	0.0266958	1.02009	0.000561	1.01994	1.02058	1.01929	0.456834	1.00963	0.000199	1.00969	1.00989	1.00949	0.420035	1.00435	0.000266	1.00448	1.00475	1.00421
z_14_03	2.94287e-05	0.0602032	1.02965	0.946668	2.25407	0.0267057	1.01971	0.000682	1.02005	1.0207	1.0194	0.456797	1.00971	0.000195	1.00969	1.00988	1.00949	0.419981	1.00448	0.000272	1.00448	1.00475	1.00421		z_14_03	3.55787e-05	0.0602009	1.02961	0.946625	2.25396	0.026709	1.01959	0.000682	1.01994	1.02058	1.01929	0.456798	1.00971	0.000195	1.00969	1.00989	1.00949	0.419983	1.00448	0.000272	1.00448	1.00475	1.00421
z_14_04	6.18864e-05	0.0606969	1.0382	0.954399	2.27258	0.026702	1.01985	0.000535	1.02005	1.0207	1.0194	0.456839	1.00962	0.000197	1.00969	1.00988	1.00949	0.419963	1.00452	0.000272	1.00448	1.00475	1.00421		z_14_04	6.80364e-05	0.0606871	1.03816	0.954357	2.27247	0.0267053	1.01973	0.000535	1.01994	1.02058	1.01929	0.45684	1.00962	0.000197	1.00969	1.00989	1.00949	0.419964	1.00452	0.000272	1.00448	1.00475	1.00421
z_14	2.47716e-05	0.0590968	1.0111	0.929582	2.2134	0.0266968	1.02005	0.000649686				0.456809	1.00969	0.000196513				0.41998	1.00448	0.000270261						3.42999e-05	0.0590949	1.01105	0.92954	2.21329	0.0266999	1.01994	0.000648819				0.456807	1.00969	0.000196259				0.419981	1.00448	0.000270261
	1.29676	0.0267004	0.026337	0.0262843	0.0263132	0.00033184		0.000636916				9.41774e-05		0.000194628				9.3625e-05		0.000269055						0.77493	0.0266136	0.0263383	0.0262855	0.0263145	0.000336116		0.000636137				8.69552e-05		0.000194376				9.36594e-05		0.000269056
z_14c_01	8.82859e-05	0.0393682	0.674829	0.619819	1.47649	0.0266494	1.02187	0.0009	1.0207	1.02164	1.01976	0.457048	1.00916	0.000211	1.00917	1.00937	1.00896	0.419792	1.00493	0.000279	1.005	1.00527	1.00472		z_14c_01	9.44359e-05	0.0393523	0.674782	0.619777	1.47638	0.0266545	1.02167	0.0009	1.02051	1.02144	1.01957	0.45705	1.00915	0.000211	1.00916	1.00937	1.00896	0.419794	1.00493	0.000279	1.00499	1.00527	1.00472
z_14c_02	2.77551e-05	0.0388	0.664459	0.610154	1.45363	0.0266879	1.02039	0.00088	1.0207	1.02164	1.01976	0.457103	1.00904	0.000204	1.00917	1.00937	1.00896	0.419747	1.00504	0.000272	1.005	1.00527	1.00472		z_14c_02	3.39051e-05	0.0387982	0.664412	0.610111	1.45352	0.026693	1.0202	0.00088	1.02051	1.02144	1.01957	0.457105	1.00903	0.000204	1.00916	1.00937	1.00896	0.419749	1.00504	0.000266	1.00499	1.00527	1.00472
z_14c_03	1.64313e-06	0.0404088	0.69214	0.635701	1.51452	0.0266806	1.02067	0.000955	1.0207	1.02164	1.01976	0.457003	1.00926	0.000207	1.00917	1.00937	1.00896	0.419737	1.00506	0.000274	1.005	1.00527	1.00472		z_14c_03	7.79309e-06	0.040413	0.692093	0.635658	1.51441	0.0266855	1.02048	0.000954	1.02051	1.02144	1.01957	0.457004	1.00925	0.000207	1.00916	1.00937	1.00896	0.419739	1.00506	0.000274	1.00499	1.00527	1.00472
z_14c_04	1.63263e-05	0.0401297	0.68679	0.630826	1.50275	0.0267017	1.01987	0.00101	1.0207	1.02164	1.01976	0.457023	1.00921	0.000201	1.00917	1.00937	1.00896	0.419782	1.00496	0.000273	1.005	1.00527	1.00472		z_14c_04	2.24762e-05	0.0401305	0.686743	0.630784	1.50264	0.0267067	1.01968	0.00101	1.02051	1.02144	1.01957	0.457025	1.00921	0.000201	1.00916	1.00937	1.00896	0.419784	1.00495	0.000273	1.00499	1.00527	1.00472
z_14c	3.35026e-05	0.0396767	0.679554	0.624125	1.48685	0.0266799	1.0207	0.00093762				0.457044	1.00917	0.000205783				0.419764	1.005	0.000274513						3.96526e-05	0.0396735	0.679507	0.624083	1.48674	0.0266849	1.02051	0.000937365				0.457046	1.00916	0.000205783				0.419767	1.00499	0.000273039
	1.13585	0.0184343	0.0182408	0.01833	0.018334	0.000829204		0.000918605				9.49568e-05		0.000203914				6.33744e-05		0.000273148						0.959683	0.0185514	0.0182421	0.0183312	0.0183353	0.000828337		0.000918529				9.50341e-05		0.000203915				6.33851e-05		0.000271683
z_14dc_01	1.67175e-05	0.027178	0.466088	0.428204	1.01981	0.026646	1.022	0.00115	1.0208	1.02203	1.01957	0.457033	1.00919	0.000231	1.0093	1.00952	1.00909	0.419886	1.00471	0.000276	1.00475	1.00503	1.00447		z_14dc_01	3.43691e-05	0.027176	0.46604	0.428162	1.0197	0.0266507	1.02182	0.00117	1.02055	1.02178	1.01931				1.00934	1.00955	1.00912	0.419889	1.0047	0.000276	1.00474	1.00502	1.00446
z_14dc_02	2.9651e-05	0.0270826	0.463662	0.426073	1.01472	0.0266833	1.02057	0.00136	1.0208	1.02203	1.01957	0.456938	1.0094	0.000205	1.0093	1.00952	1.00909	0.419895	1.00469	0.000285	1.00475	1.00503	1.00447		z_14dc_02	3.58009e-05	0.0270803	0.463615	0.426031	1.01461	0.0266907	1.02029	0.00136	1.02055	1.02178	1.01931	0.456941	1.00939	0.000205	1.00934	1.00955	1.00912	0.419898	1.00468	0.000285	1.00474	1.00502	1.00446
z_14dc_03	2.88837e-06	0.0276338	0.472729	0.434289	1.03449	0.0267121	1.01947	0.00106	1.0208	1.02203	1.01957	0.456969	1.00933	0.000222	1.0093	1.00952	1.00909	0.419811	1.00489	0.000284	1.00475	1.00503	1.00447		z_14dc_03	9.03833e-06	0.0276377	0.472682	0.434247	1.03438	0.0267193	1.01919	0.00106	1.02055	1.02178	1.01931	0.456971	1.00933	0.000222	1.00934	1.00955	1.00912	0.419814	1.00488	0.000284	1.00474	1.00502	1.00446
z_14dc_04	4.96012e-05	0.0276895	0.474306	0.435797	1.0379	0.0266675	1.02117	0.00133	1.0208	1.02203	1.01957	0.456988	1.00929	0.000212	1.0093	1.00952	1.00909	0.419885	1.00471	0.000276	1.00475	1.00503	1.00447		z_14dc_04	5.57512e-05	0.0276825	0.474259	0.435754	1.03779	0.0266747	1.0209	0.00133	1.02055	1.02178	1.01931	0.456991	1.00928	0.000212	1.00934	1.00955	1.00912	0.419888	1.0047	0.000276	1.00474	1.00502	1.00446
z_14dc	2.47145e-05	0.027396	0.469196	0.431091	1.02673	0.0266772	1.0208	0.00123132				0.456982	1.0093	0.000217723				0.419869	1.00475	0.000280282						3.37399e-05	0.0273941	0.469149	0.431048	1.02662	0.0266838	1.02055	0.00123602				0.456968	1.00934	0.000213114				0.419873	1.00474	0.000280282
	0.803844	0.0113188	0.0109289	0.0108712	0.01092	0.0010426		0.00120623				8.7305e-05		0.000215717				9.32174e-05		0.000278958						0.567356	0.0113225	0.01093	0.0108723	0.0109212	0.00107874		0.00121113				5.4993e-05		0.000211143				9.32731e-05		0.00027896
z_135_01	-4.16546e-06	0.0588528	1.00744	0.926234	2.20558	0.0266843	1.02053	0.000549	1.02041	1.02103	1.01979	0.456771	1.00977	0.000196	1.00971	1.0099	1.00951	0.41995	1.00455	0.000272	1.00454	1.00481	1.00427		z_135_01	1.9845e-06	0.0588583	1.0074	0.926192	2.20547	0.0266877	1.0204	0.000549	1.02029	1.02091	1.01966	0.456772	1.00977	0.000196	1.0097	1.0099	1.0095	0.419951	1.00455	0.000272	1.00454	1.00481	1.00426
z_135_02	-4.01124e-05	0.0598257	1.02306	0.940582	2.23949	0.0267183	1.01923	0.000652	1.02041	1.02103	1.01979	0.456828	1.00964	0.000206	1.00971	1.0099	1.00951	0.419998	1.00444	0.00027	1.00454	1.00481	1.00427		z_135_02	-3.39624e-05	0.0598396	1.02302	0.94054	2.23938	0.0267217	1.0191	0.000652	1.02029	1.02091	1.01966	0.456829	1.00964	0.000206	1.0097	1.0099	1.0095	0.42	1.00444	0.00027	1.00454	1.00481	1.00426
z_135_03	-2.11876e-05	0.0592069	1.01413	0.932339	2.2201	0.026671	1.02104	0.000583	1.02041	1.02103	1.01979	0.456794	1.00972	0.000198	1.00971	1.0099	1.00951	0.419954	1.00455	0.000267	1.00454	1.00481	1.00427		z_135_03	-1.50376e-05	0.0592164	1.01408	0.932297	2.21999	0.0266743	1.02091	0.000583	1.02029	1.02091	1.01966	0.456795	1.00972	0.000198	1.0097	1.0099	1.0095	0.419955	1.00454	0.000267	1.00454	1.00481	1.00426
z_135_04	3.80513e-05	0.0590788	1.01155	0.929856	2.21439	0.0266759	1.02085	0.000689	1.02041	1.02103	1.01979	0.456807	1.00969	0.000197	1.00971	1.0099	1.00951	0.419916	1.00464	0.000268	1.00454	1.00481	1.00427		z_135_04	4.42013e-05	0.0590745	1.0115	0.929814	2.21428	0.0266793	1.02072	0.000689	1.02029	1.02091	1.01966	0.456808	1.00969	0.000197	1.0097	1.0099	1.0095	0.419917	1.00463	0.000268	1.00454	1.00481	1.00426
z_135	-6.85353e-06	0.0592411	1.01405	0.932253	2.21989	0.0266874	1.02041	0.000620708				0.4568	1.00971	0.000199289				0.419954	1.00454	0.000269257						-7.03569e-07	0.0592472	1.014	0.932211	2.21978	0.0266907	1.02029	0.000620708				0.456801	1.0097	0.000199289				0.419956	1.00454	0.000269257
	-4.8651	0.00702816	0.00651977	0.00653503	0.00647232	0.000800431		0.000608291				5.25624e-05		0.000197374				8.06877e-05		0.000268039						-47.3914	0.00711378	0.00652008	0.00653532	0.00647264	0.000799749		0.000608368				5.25499e-05		0.000197374				8.06731e-05		0.00026804
z_135c_01	-7.81307e-06	0.00635715	0.10836	0.0993413	0.236711	0.0268636	1.01372	0.0032	1.02116	1.02485	1.01747	0.457774	1.00756	0.000422	1.00797	1.00833	1.00761	0.419675	1.00521	0.000439	1.00552	1.00593	1.00512		z_135c_01	-1.66311e-06	0.00636353	0.108313	0.099299	0.236603	0.0268953	1.01252	0.00319	1.01996	1.02365	1.01628	0.457786	1.00753	0.000422	1.00794	1.0083	1.00759	0.419689	1.00518	0.000439	1.00549	1.0059	1.00508
z_135c_02	-6.86399e-06	0.00616385	0.10644	0.0975949	0.232651	0.0265063	1.02738	0.00445	1.02116	1.02485	1.01747	0.457509	1.00814	0.000304	1.00797	1.00833	1.00761	0.419495	1.00564	0.000408	1.00552	1.00593	1.00512		z_135c_02	-7.14035e-07	0.00617001	0.106393	0.0975525	0.232542	0.0265383	1.02614	0.00444	1.01996	1.02365	1.01628	0.45752	1.00812	0.000304	1.00794	1.0083	1.00759	0.419509	1.00561	0.000408	1.00549	1.0059	1.00508
z_135c_03	1.14972e-05	0.00643753	0.111003	0.101759	0.242515	0.0265333	1.02634	0.00367	1.02116	1.02485	1.01747	0.457718	1.00768	0.000384	1.00797	1.00833	1.00761	0.419601	1.00539	0.000365	1.00552	1.00593	1.00512		z_135c_03	1.76472e-05	0.00643944	0.110956	0.101717	0.242406	0.0265641	1.02515	0.00367	1.01996	1.02365	1.01628	0.457729	1.00766	0.000384	1.00794	1.0083	1.00759	0.419614	1.00536	0.000366	1.00549	1.0059	1.00508
z_135c_04	5.35129e-05	0.00652456	0.111248	0.102021	0.243248	0.0267715	1.01721	0.0033	1.02116	1.02485	1.01747	0.457345	1.0085	0.000304	1.00797	1.00833	1.00761	0.419411	1.00584	0.00041	1.00552	1.00593	1.00512		z_135c_04	5.96629e-05	0.00651671	0.111201	0.101979	0.243139	0.0268023	1.01604	0.0033	1.01996	1.02365	1.01628	0.457356	1.00848	0.000304	1.00794	1.0083	1.00759	0.419425	1.00581	0.00041	1.00549	1.0059	1.00508
z_135c	1.25833e-05	0.00637077	0.109263	0.100179	0.238781	0.0266687	1.02116	0.00368787				0.457587	1.00797	0.000357202				0.419545	1.00552	0.000406359						1.87332e-05	0.00637242	0.109216	0.100137	0.238672	0.0267	1.01996	0.00368268				0.457598	1.00794	0.000357202				0.41956	1.00549	0.000406584
	2.2806	0.0241664	0.0209741	0.0209939	0.0210456	0.00661161		0.00361144				0.000431705		0.000354377				0.000276341		0.000404127						1.5319	0.0233391	0.0209832	0.0210028	0.0210552	0.00660144		0.0036106				0.000431973		0.000354386				0.000276592		0.000404364
z_135dc_01	3.91727e-05	0.0233035	0.39934	0.366874	0.873914	0.0266553	1.02164	0.00139	1.02131	1.02263	1.01999	0.456956	1.00936	0.000227	1.00924	1.00946	1.00901	0.419806	1.0049	0.000288	1.00487	1.00515	1.00458		z_135dc_01	4.53226e-05	0.0232989	0.399293	0.366832	0.873805	0.0266638	1.02131	0.00139	1.02099	1.0223	1.01967	0.456959	1.00935	0.000227	1.00923	1.00946	1.00901	0.41981	1.00489	0.000288	1.00486	1.00514	1.00457
z_135dc_02	1.84995e-05	0.0230875	0.396036	0.363716	0.866463	0.0266407	1.0222	0.00138	1.02131	1.02263	1.01999	0.457072	1.0091	0.00023	1.00924	1.00946	1.00901	0.419771	1.00498	0.000269	1.00487	1.00515	1.00458		z_135dc_02	2.46494e-05	0.0230878	0.395989	0.363674	0.866355	0.0266493	1.02187	0.00138	1.02099	1.0223	1.01967	0.457075	1.0091	0.000229	1.00923	1.00946	1.00901	0.419775	1.00497	0.000269	1.00486	1.00514	1.00457
z_135dc_03	6.65371e-06	0.0235705	0.403446	0.370631	0.882821	0.0266975	1.02003	0.00119	1.02131	1.02263	1.01999	0.456996	1.00927	0.000246	1.00924	1.00946	1.00901	0.419826	1.00485	0.000292	1.00487	1.00515	1.00458		z_135dc_03	1.28037e-05	0.0235736	0.403398	0.370589	0.882712	0.026706	1.0197	0.00119	1.02099	1.0223	1.01967	0.456999	1.00927	0.000246	1.00923	1.00946	1.00901	0.41983	1.00484	0.000292	1.00486	1.00514	1.00457
z_135dc_04	-1.52847e-05	0.0234982	0.402848	0.370103	0.881462	0.0266621	1.02138	0.0013	1.02131	1.02263	1.01999	0.457022	1.00921	0.000199	1.00924	1.00946	1.00901	0.419874	1.00474	0.000295	1.00487	1.00515	1.00458		z_135dc_04	-9.1347e-06	0.0235063	0.402801	0.370061	0.881353	0.0266705	1.02106	0.0013	1.02099	1.0223	1.01967	0.457025	1.00921	0.000199	1.00923	1.00946	1.00901	0.419878	1.00473	0.000295	1.00486	1.00514	1.00457
z_135dc	1.22603e-05	0.0233649	0.400417	0.367831	0.876165	0.0266639	1.02131	0.00131744				0.457012	1.00924	0.000226134				0.419819	1.00487	0.000286179						1.84103e-05	0.0233667	0.40037	0.367789	0.876056	0.0266724	1.02099	0.00131744				0.457015	1.00923	0.00022588				0.419823	1.00486	0.000286179
	1.85599	0.00927085	0.00858306	0.0087181	0.00863061	0.000904994		0.00128995				0.00010647		0.000224064				0.000102406		0.000284793						1.23599	0.00939759	0.00858407	0.0087191	0.00863168	0.000902499		0.00129036				0.000106509		0.000223814				0.00010235		0.000284796

## Sheet: blk-01
Cycle	Time	202Hg	204Pb	206Pb	207Pb	208Pb	204Pb/208Pb (1)	206Pb/208Pb (2)	207Pb/208Pb (3)
1	1.75525e+09	-0.000252801	-1.04212e-05	0.000110666	6.18522e-05	0.000284942	-0.0365732	0.388381	0.21707
2	1.75525e+09	-0.000166761	3.08101e-05	1.5081e-05	-4.75538e-05	6.17496e-05	0.498953	0.244228	-0.770107
3	1.75525e+09	-0.000167696	-0.000165023	0.000113533	-5.60417e-05	2.86008e-07	-576.99	396.96	-195.945
4	1.75525e+09	-0.000165825	-0.000140664	0.000214864	-8.88585e-06	-5.07732e-05	2.77043	-4.23183	0.175011
5	1.75525e+09	-9.62359e-06	-0.000126609	-1.55042e-05	-9.82899e-06	0.000220627	-0.573862	-0.0702735	-0.0445503
6	1.75525e+09	3.52773e-05	-0.000104122	3.03739e-05	0.000118446	-0.000187864	0.554245	-0.161681	-0.63049
7	1.75525e+09	0.000269169	1.76909e-05	-3.6531e-05	1.46929e-05	0.000154425	0.11456	-0.236562	0.0951461
8	1.75525e+09	0.000184962	5.33007e-05	-8.43176e-05	-0.000115455	1.23157e-06	43.2786	-68.4633	-93.7459
9	1.75525e+09	-7.69711e-05	-0.00026152	-0.000122545	3.54427e-05	0.000137402	-1.90332	-0.891871	0.257948
10	1.75525e+09	-0.000233162	-4.32177e-05	-0.000106299	0.000164667	-2.80805e-05	1.53906	3.78549	-5.8641
11	1.75525e+09	-3.8621e-05	-3.57214e-05	-1.45485e-05	0.000126936	-0.000118848	0.300564	0.122412	-1.06805
12	1.75525e+09	2.96646e-05	7.76661e-05	-0.000142614	5.24201e-05	-6.40103e-05	-1.21334	2.22798	-0.818933
13	1.75525e+09	-0.000219134	3.83069e-05	0.000114489	3.54427e-05	0.000250892	0.152683	0.456329	0.141267
14	1.75525e+09	-7.75276e-06	-4.97768e-05	-5.94646e-06	-0.000166378	-0.000140593	0.354049	0.0422955	1.1834
15	1.75525e+09	-0.000135896	-7.3202e-05	-0.000144525	-9.94231e-05	-3.56448e-05	2.05365	4.0546	2.78927
16	1.75525e+09	-0.000119061	-3.38474e-05	-5.85131e-05	0.000136368	0.00023103	-0.146506	-0.25327	0.590261
17	1.75525e+09	-0.000203235	-0.000125672	0.000107798	-5.41555e-05	-9.6157e-05	1.30695	-1.12106	0.563199
18	1.75525e+09	-1.33652e-05	0.000154515	-4.22655e-05	0.000137312	0.000216844	0.712562	-0.194912	0.633228
19	1.75525e+09	-1.43007e-05	0.000236056	0.000186184	0.000242021	-7.91383e-05	-2.98282	-2.35264	-3.05821
20	1.75525e+09	0.000162508	0.000143268	-9.96088e-05	2.78973e-05	3.90549e-05	3.66838	-2.55048	0.714309
***	Cup	L3	L1	C	H1	H2	L1 | H2	C | H2	H1 | H2
***	Info	tbdgy	tbdgy	tbdgy	tbdgy	tbdgy	tbdgy - St	tbdgy - St	tbdgy - St
***	Mean	-5.71313e-05	-2.09093e-05	9.88562e-07	2.97888e-05	3.98688e-05	-26.3271	16.3877	-14.7293
***	StdErr (%)	-56.898	-128.258	2452.89	77.9749	81.6736	-110.393	124.019	-72.1376
***	StdErr (abs)	3.25066e-05	2.68177e-05	2.42483e-05	2.32278e-05	3.25623e-05	29.0631	20.3238	10.6253
***	StdDev (%)	-254.456	-573.586	10969.7	348.714	365.256	-493.691	554.629	-322.609
***	StdDev (abs)	0.000145374	0.000119933	0.000108442	0.000103878	0.000145623	129.974	90.8907	47.5179
***	Valid Values	20 (20)	20 (20)	20 (20)	20 (20)	20 (20)	20 (20)	20 (20)	20 (20)

## Sheet: blk-02
Cycle	Time	202Hg	204Pb	206Pb	207Pb	208Pb	204Pb/208Pb (1)	206Pb/208Pb (2)	207Pb/208Pb (3)
1	1.75526e+09	9.33807e-05	3.26675e-05	0.000377153	6.63421e-05	0.000256152	0.127532	1.47238	0.258995
2	1.75526e+09	9.05742e-05	-9.75792e-05	0.000137184	0.000146518	0.000253315	-0.38521	0.541554	0.578405
3	1.75526e+09	9.18748e-06	0.000150748	-3.00917e-05	0.000230474	0.00049642	0.30367	-0.0606175	0.464273
4	1.75526e+09	4.75413e-05	-1.32488e-05	5.49762e-05	-8.55032e-05	0.000277906	-0.0476735	0.197823	-0.307669
5	1.75526e+09	-3.66481e-05	-6.00999e-05	3.01242e-05	-8.73893e-05	0.000125637	-0.478362	0.239772	-0.695571
6	1.75526e+09	-1.32628e-05	0.000225727	0.000268156	-4.87229e-05	0.000405603	0.556521	0.661128	-0.120125
7	1.75526e+09	9.89939e-05	6.82776e-05	0.000199321	0.000139915	0.000594814	0.114788	0.335099	0.235225
8	1.75526e+09	0.000150449	0.000247284	0.000251903	8.61498e-05	0.000246694	1.00239	1.02111	0.349217
9	1.75526e+09	-2.97317e-06	-9.38314e-05	-0.000118975	-0.00010625	0.000128474	-0.730353	-0.926065	-0.827019
10	1.75526e+09	8.68321e-05	-0.000101327	-3.48706e-05	9.74686e-05	9.82119e-05	-1.03172	-0.355055	0.992431
11	1.75526e+09	4.0993e-05	9.26431e-05	2.40529e-06	9.65254e-05	7.45704e-05	1.24236	0.0322553	1.29442
12	1.75526e+09	9.18748e-06	3.07933e-05	0.000291101	1.16374e-05	0.000269394	0.114306	1.08058	0.0431986
13	1.75526e+09	0.000121447	8.30351e-06	9.22554e-05	1.91827e-05	4.33643e-05	0.191482	2.12745	0.442362
14	1.75526e+09	0.000136416	-7.41548e-05	-5.30302e-05	4.93645e-05	0.000140768	-0.526787	-0.37672	0.350679
15	1.75526e+09	-0.000117089	-0.000178155	0.000139095	-4.77798e-05	-5.49755e-05	3.24062	-2.53013	0.86911
16	1.75526e+09	0.00019068	4.76611e-05	0.000117109	0.000330476	0.000346955	0.13737	0.337534	0.952505
17	1.75526e+09	-3.38419e-05	0.000167618	-3.58264e-05	0.000149348	-0.000106033	-1.58081	0.33788	-1.40851
18	1.75526e+09	4.37994e-05	-0.000239051	7.79171e-05	0.000109731	0.000156845	-1.52412	0.496776	0.699611
19	1.75526e+09	-7.78047e-05	8.60831e-05	3.39475e-05	9.74686e-05	-7.57769e-05	-1.13601	-0.447993	-1.28626
20	1.75526e+09	5.87671e-05	-0.00012194	6.64466e-05	-0.000157174	-0.000119269	1.02239	-0.557113	1.3178
***	Cup	L3	L1	C	H1	H2	L1 | H2	C | H2	H1 | H2
***	Info	tbdgy	tbdgy	tbdgy	tbdgy	tbdgy	tbdgy - St	tbdgy - St	tbdgy - St
***	Mean	4.48314e-05	8.92095e-06	9.3315e-05	5.48892e-05	0.000177953	0.0306199	0.181382	0.210154
***	StdErr (%)	39.3627	329.32	31.3043	49.1122	24.4649	802.482	118.998	83.4813
***	StdErr (abs)	1.76468e-05	2.93784e-05	2.92116e-05	2.69573e-05	4.35361e-05	0.245719	0.215842	0.17544
***	StdDev (%)	176.035	1472.76	139.997	219.637	109.41	3588.81	532.177	373.34
***	StdDev (abs)	7.89191e-05	0.000131384	0.000130638	0.000120557	0.0001947	1.09889	0.965276	0.78459
***	Valid Values	20 (20)	20 (20)	20 (20)	20 (20)	20 (20)	20 (20)	20 (20)	20 (20)

## Sheet: z_14_01
											M(202Hg)	g/mol	201.971	8e-07	K(204Hg)	1	0.990092			M	Meng Wang et al 2021 Chinese Phys. C 45 030003
											M(204Hg)	g/mol	203.973	5e-07	K(204Pb)	1	1.02047			x	De Laeter et al., 2003 IUPAC, Pure and Applied Chemistry 75, 683–800
											M(206Pb)	g/mol	205.974	1.2e-06	K(206Pb)	1	1.00981			R_cert	NIST SRM 981 certificate of analysis
											M(208Pb)	g/mol	207.977	1.2e-06	K(207Pb)	1	1.00457
											x(202Hg)	mol/mol	0.2986	0.0026
											x(204Hg)	mol/mol	0.0687	0.0015
											R204,cert	mol/mol	0.0272321
											R206,cert	mol/mol	0.461233
											R207,cert	mol/mol	0.421862
											g	1	-1.02006
														blank correction
Cycle	Time	202Hg	204Pb	206Pb	207Pb	208Pb	204Pb/208Pb (1)	206Pb/208Pb (2)	207Pb/208Pb (3)		204Pb_corr	204Pb_corr Pb/208Pb (1)		202Hg	204Pb	206Pb	207Pb	208Pb	204Pb/208Pb (1)	206Pb/208Pb (2)	207Pb/208Pb (3)		204Pb_corr_bl	204Pb_corr_bl Pb/208Pb (1)
1	1.75525e+09	9.37784e-05	0.0583148	0.993581	0.913151	2.17441	0.0268186	0.456943	0.419953		0.058293	0.0268086		9.99284e-05	0.0583208	0.993534	0.913109	2.1743	0.0268227	0.456944	0.419955		0.0582975	0.0268121
2	1.75525e+09	9.37784e-05	0.0580217	0.989894	0.910569	2.16733	0.026771	0.456733	0.420133		0.0579999	0.026761		9.99284e-05	0.0580277	0.989847	0.910527	2.16723	0.0267751	0.456735	0.420135		0.0580045	0.0267644
3	1.75525e+09	-0.000109207	0.0580439	0.994185	0.914327	2.17662	0.026667	0.456757	0.420067		0.0580693	0.0266787		-0.000103057	0.0580499	0.994138	0.914284	2.17651	0.0266711	0.456758	0.420069		0.0580738	0.0266821
4	1.75525e+09	8.44233e-05	0.0574263	0.97922	0.900222	2.14398	0.0267848	0.456729	0.419883		0.0574067	0.0267757		9.05733e-05	0.0574323	0.979173	0.900179	2.14388	0.026789	0.45673	0.419884		0.0574112	0.0267792
5	1.75525e+09	1.33276e-05	0.05733	0.983924	0.904627	2.155	0.0266033	0.456578	0.419781		0.0573269	0.0266019		1.94776e-05	0.057336	0.983877	0.904585	2.15489	0.0266074	0.456579	0.419783		0.0573314	0.0266053
6	1.75525e+09	-4.84092e-05	0.0580526	0.998079	0.917678	2.18586	0.0265582	0.456607	0.419824		0.0580638	0.0265634		-4.22593e-05	0.0580586	0.998032	0.917635	2.18575	0.0265623	0.456608	0.419826		0.0580684	0.0265668
7	1.75525e+09	8.62944e-05	0.0575053	0.986478	0.906428	2.15952	0.0266288	0.456805	0.419736		0.0574852	0.0266195		9.24443e-05	0.0575113	0.986431	0.906385	2.15941	0.0266329	0.456806	0.419738		0.0574898	0.0266229
8	1.75525e+09	4.60684e-05	0.058042	0.991784	0.911949	2.17058	0.0267403	0.456921	0.420141		0.0580313	0.0267354		5.22184e-05	0.058048	0.991736	0.911907	2.17047	0.0267444	0.456923	0.420143		0.0580358	0.0267388
9	1.75525e+09	7.50684e-05	0.0584652	0.995291	0.915115	2.17824	0.0268406	0.456925	0.420117		0.0584477	0.0268326		8.12183e-05	0.0584712	0.995243	0.915073	2.17813	0.0268447	0.456926	0.420119		0.0584523	0.026836
10	1.75525e+09	6.01005e-05	0.0574475	0.982996	0.903257	2.15216	0.026693	0.456749	0.419698		0.0574335	0.0266865		6.62505e-05	0.0574535	0.982949	0.903214	2.15205	0.0266971	0.45675	0.4197		0.0574381	0.02669
11	1.75525e+09	9.93915e-05	0.0577269	0.98618	0.906876	2.1594	0.0267328	0.456691	0.419966		0.0577038	0.0267221		0.000105541	0.0577328	0.986132	0.906834	2.15929	0.0267369	0.456692	0.419968		0.0577083	0.0267256
12	1.75525e+09	-0.00014849	0.0583659	0.998542	0.917993	2.18531	0.0267082	0.456933	0.420074		0.0584004	0.026724		-0.00014234	0.0583719	0.998495	0.917951	2.18521	0.0267123	0.456934	0.420075		0.0584049	0.0267274
13	1.75525e+09	2.2682e-05	0.0573704	0.985972	0.906499	2.15888	0.0265742	0.456706	0.419894		0.0573652	0.0265718		2.8832e-05	0.0573764	0.985925	0.906457	2.15877	0.0265783	0.456708	0.419896		0.0573697	0.0265752
14	1.75525e+09	7.41329e-05	0.057277	0.979637	0.900437	2.14455	0.0267082	0.456804	0.419873		0.0572598	0.0267002		8.02828e-05	0.057283	0.979589	0.900394	2.14444	0.0267124	0.456805	0.419874		0.0572643	0.0267037
15	1.75525e+09	-0.000121366	0.0578685	0.991996	0.912373	2.17195	0.0266435	0.45673	0.42007		0.0578967	0.0266565		-0.000115216	0.0578745	0.991949	0.912331	2.17184	0.0266476	0.456731	0.420072		0.0579013	0.02666
16	1.75525e+09	-0.000135396	0.058148	0.993608	0.914343	2.17615	0.0267206	0.45659	0.420166		0.0581795	0.026735		-0.000129246	0.058154	0.993561	0.914301	2.17604	0.0267247	0.456591	0.420167		0.058184	0.0267385
17	1.75525e+09	-3.15723e-05	0.0576074	0.98853	0.909091	2.16475	0.0266115	0.456648	0.419951		0.0576147	0.0266149		-2.54223e-05	0.0576134	0.988483	0.909049	2.16464	0.0266156	0.456649	0.419953		0.0576193	0.0266184
18	1.75525e+09	0.00010594	0.0576488	0.990837	0.910455	2.16937	0.026574	0.456739	0.419686		0.0576242	0.0265626		0.00011209	0.0576548	0.990789	0.910413	2.16926	0.0265781	0.45674	0.419688		0.0576288	0.026566
19	1.75525e+09	0.000112489	0.0581798	0.997423	0.917055	2.18391	0.0266402	0.456714	0.419914		0.0581537	0.0266282		0.000118639	0.0581858	0.997376	0.917012	2.1838	0.0266443	0.456715	0.419915		0.0581582	0.0266316
20	1.75526e+09	0.000110618	0.058147	0.99283	0.912725	2.17365	0.0267508	0.456757	0.419904		0.0581213	0.026739		0.000116768	0.058153	0.992783	0.912683	2.17354	0.0267549	0.456758	0.419905		0.0581259	0.0267425
***	Cup	L3	L1	C	H1	H2	L1 | H2	C | H2	H1 | H2
***	Info	tbdgy	tbdgy	tbdgy	tbdgy	tbdgy	tbdgy - St	tbdgy - St	tbdgy - St
***	Mean	2.41826e-05	0.0578494	0.990049	0.910258	2.16758	0.0266885	0.456753	0.419942		0.0578438	0.0266859		3.03326e-05	0.0578554	0.990002	0.910216	2.16747	0.0266926	0.456754	0.419943		0.0578484	0.0266893
***	StdErr (%)	83.3525	0.145584	0.130621	0.133287	0.129589	0.0696358	0.00539122	0.00798244		0.00147581	0.00067944		0.664527	0.00145568	0.00130627	0.00133293	0.00129596	0.000696291	5.39141e-05	7.9826e-05		0.00147569	0.000679383
***	StdErr (abs)	2.01569e-05	8.42193e-05	0.00129321	0.00121325	0.00280896	1.85847e-05	2.46245e-05	3.35216e-05
***	StdDev (%)	372.764	0.651069	0.584154	0.596077	0.579542	0.311421	0.0241102	0.0356986
***	StdDev (abs)	9.01442e-05	0.00037664	0.00578342	0.00542584	0.012562	8.31135e-05	0.000110124	0.000149913
***	Valid Values	20 (20)	20 (20)	20 (20)	20 (20)	20 (20)	20 (20)	20 (20)	20 (20)

## Sheet: z_14_02
											M(202Hg)	g/mol	201.971	8e-07	K(204Hg)	1	0.990297			M	Meng Wang et al 2021 Chinese Phys. C 45 030003
											M(204Hg)	g/mol	203.973	5e-07	K(204Pb)	1	1.02017			x	De Laeter et al., 2003 IUPAC, Pure and Applied Chemistry 75, 683–800
											M(206Pb)	g/mol	205.974	1.2e-06	K(206Pb)	1	1.0096			R_cert	NIST SRM 981 certificate of analysis
											M(208Pb)	g/mol	207.977	1.2e-06	K(207Pb)	1	1.00435
											x(202Hg)	mol/mol	0.2986	0.0026
											x(204Hg)	mol/mol	0.0687	0.0015
											R204,cert	mol/mol	0.0272321
											R206,cert	mol/mol	0.461233
											R207,cert	mol/mol	0.421862
											g	1	-1.02006
														blank correction
Cycle	Time	202Hg	204Pb	206Pb	207Pb	208Pb	204Pb/208Pb (1)	206Pb/208Pb (2)	207Pb/208Pb (3)		204Pb_corr	204Pb_corr Pb/208Pb (1)		202Hg	204Pb	206Pb	207Pb	208Pb	204Pb/208Pb (1)	206Pb/208Pb (2)	207Pb/208Pb (3)		204Pb_corr_bl	204Pb_corr_bl Pb/208Pb (1)
1	1.75526e+09	0.000110666	0.0580833	0.993369	0.913398	2.17443	0.026712	0.456841	0.420064		0.0580575	0.0267001		0.000116816	0.0580892	0.993322	0.913356	2.17432	0.0267161	0.456843	0.420065		0.0580621	0.0267036
2	1.75526e+09	-7.64227e-05	0.0582838	0.997172	0.916282	2.18158	0.0267163	0.000565	0.420008		0.0583015	0.0267244		0.0002	0.0582897	0.997125	0.91624	2.18147	0.0267203		0.42001		0.0582433	0.026699
3	1.75526e+09	2.74074e-05	0.0568416	0.970955	0.892612	2.12576	0.0267394	0.456757	0.419903		0.0568353	0.0267365		3.35573e-05	0.0568476	0.970908	0.89257	2.12565	0.0267436	0.456758	0.419904		0.0568398	0.02674
4	1.75526e+09	-1.74935e-05	0.0566953	0.970265	0.89206	2.12326	0.0267019	0.456968	0.420136		0.0566994	0.0267039		-1.13435e-05	0.0567013	0.970218	0.892017	2.12316	0.0267061	0.45697	0.420137		0.0567039	0.0267074
5	1.75526e+09	2.17946e-05	0.0571208	0.981631	0.902544	2.14829	0.026589	0.456937	0.420123		0.0571158	0.0265867		2.79446e-05	0.0571268	0.981584	0.902502	2.14818	0.0265932	0.456938	0.420124		0.0571203	0.0265901
6	1.75526e+09	5.89212e-06	0.057351	0.982269	0.902839	2.15	0.0266748	0.456868	0.419924		0.0573496	0.0266742		1.20421e-05	0.057357	0.982222	0.902797	2.1499	0.026679	0.45687	0.419926		0.0573542	0.0266777
7	1.75526e+09	-0.000278439	0.058037	0.993529	0.913464	2.17435	0.0266917	0.456932	0.420109		0.0581017	0.0267214		-0.000272289	0.058043	0.993482	0.913422	2.17424	0.0266958	0.456933	0.420111		0.0581062	0.0267249
8	1.75526e+09	8.72783e-05	0.0590466	1.01186	0.929864	2.21428	0.0266662	0.456972	0.419939		0.0590263	0.0266571		9.34282e-05	0.0590526	1.01182	0.929821	2.21417	0.0266703	0.456973	0.419941		0.0590309	0.0266605
9	1.75526e+09	-9.07472e-06	0.0576978	0.988304	0.909543	2.1648	0.0266527	0.456534	0.420151		0.0576999	0.0266537		-2.92476e-06	0.0577038	0.988257	0.9095	2.16469	0.0266568	0.456535	0.420153		0.0577045	0.0266572
10	1.75526e+09	-0.000108224	0.0582587	0.99523	0.915486	2.17913	0.0267348	0.456709	0.420115		0.0582838	0.0267463		-0.000102074	0.0582647	0.995182	0.915444	2.17902	0.0267389	0.45671	0.420116		0.0582884	0.0267498
11	1.75526e+09	4.79876e-05	0.0565856	0.967404	0.889377	2.11767	0.0267207	0.456825	0.419979		0.0565744	0.0267155		5.41375e-05	0.0565916	0.967357	0.889334	2.11756	0.0267249	0.456826	0.419981		0.056579	0.026719
12	1.75526e+09	1.80528e-05	0.0564855	0.964878	0.88705	2.11311	0.026731	0.456616	0.419785		0.0564813	0.0267291		2.42028e-05	0.0564915	0.964831	0.887008	2.113	0.0267353	0.456617	0.419787		0.0564859	0.0267326
13	1.75526e+09	4.95669e-06	0.0569957	0.976203	0.898126	2.13731	0.026667	0.456744	0.420214		0.0569945	0.0266665		1.11066e-05	0.0570017	0.976156	0.898084	2.1372	0.0266712	0.456745	0.420215		0.0569991	0.02667
14	1.75526e+09	0.000151831	0.0576169	0.986295	0.906405	2.15873	0.0266901	0.456886	0.419878		0.0575816	0.0266738		0.000157981	0.0576229	0.986248	0.906363	2.15862	0.0266942	0.456887	0.41988		0.0575862	0.0266772
15	1.75526e+09	-0.000145637	0.0582278	0.997659	0.917349	2.1842	0.0266586	0.456761	0.419992		0.0582617	0.0266741		-0.000139487	0.0582338	0.997612	0.917307	2.1841	0.0266627	0.456762	0.419994		0.0582662	0.0266775
16	1.75526e+09	9.38269e-05	0.0584361	0.998788	0.918419	2.18665	0.026724	0.456765	0.420011		0.0584143	0.026714		9.99768e-05	0.0584421	0.998741	0.918377	2.18655	0.026728	0.456767	0.420013		0.0584188	0.0267174
17	1.75526e+09	2.17946e-05	0.0585556	0.999237	0.918335	2.18577	0.0267895	0.457156	0.420142		0.0585506	0.0267872		2.79446e-05	0.0585616	0.99919	0.918293	2.18566	0.0267936	0.457157	0.420144		0.0585551	0.0267906
18	1.75526e+09	2.17946e-05	0.0578606	0.98818	0.908524	2.16331	0.0267463	0.456791	0.41997		0.0578556	0.026744		2.79446e-05	0.0578666	0.988133	0.908482	2.1632	0.0267505	0.456792	0.419971		0.0578601	0.0267475
19	1.75526e+09	-3.43307e-05	0.0576409	0.987457	0.907818	2.16102	0.026673	0.456941	0.420088		0.0576489	0.0266767		-2.81808e-05	0.0576469	0.98741	0.907775	2.16091	0.0266772	0.456942	0.420089		0.0576535	0.0266802
20	1.75526e+09	-0.000271893	0.056934	0.979226	0.90059	2.14355	0.0265607	0.456825	0.42014		0.0569972	0.0265902		-0.000265743	0.05694	0.979179	0.900547	2.14344	0.0265648	0.456827	0.420142		0.0570018	0.0265936
***	Cup	L3	L1	C	H1	H2	L1 | H2	C | H2	H1 | H2
***	Info	tbdgy	tbdgy	tbdgy	tbdgy	tbdgy	tbdgy - St	tbdgy - St	tbdgy - St
***	Mean	-1.64116e-05	0.0576377	0.986496	0.907004	2.15936	0.026692	0.456846	0.420034		0.0576415	0.0266938		3.25201e-06	0.0576437	0.986449	0.906962	2.15925	0.0266961	0.456834	0.420035		0.057643	0.0266958
***	StdErr (%)	-154.079	0.284821	0.280651	0.279106	0.278239	0.0444302	0.00724329	0.00595666		0.00284642	0.000417346		8.34619	0.00284792	0.00280664	0.00279119	0.00278253	0.000444229	7.05449e-05	5.95678e-05		0.00283532	0.000412972
***	StdErr (abs)	2.52869e-05	0.000164165	0.00276861	0.0025315	0.00600818	1.18593e-05	3.30906e-05	2.502e-05
***	StdDev (%)	-689.064	1.27376	1.25511	1.2482	1.24432	0.198698	0.032393	0.026639
***	StdDev (abs)	0.000113086	0.000734166	0.0123816	0.0113212	0.0268694	5.30365e-05	0.000147986	0.000111893
***	Valid Values	20 (20)	20 (20)	20 (20)	20 (20)	20 (20)	20 (20)	20 (20)	20 (20)

## Sheet: z_14_03
											M(202Hg)	g/mol	201.971	8e-07	K(204Hg)	1	0.99019			M	Meng Wang et al 2021 Chinese Phys. C 45 030003
											M(204Hg)	g/mol	203.973	5e-07	K(204Pb)	1	1.01971			x	De Laeter et al., 2003 IUPAC, Pure and Applied Chemistry 75, 683–800
											M(206Pb)	g/mol	205.974	1.2e-06	K(206Pb)	1	1.00971			R_cert	NIST SRM 981 certificate of analysis
											M(208Pb)	g/mol	207.977	1.2e-06	K(207Pb)	1	1.00448
											x(202Hg)	mol/mol	0.2986	0.0026
											x(204Hg)	mol/mol	0.0687	0.0015
											R204,cert	mol/mol	0.0272321
											R206,cert	mol/mol	0.461233
											R207,cert	mol/mol	0.421862
											g	1	-1.02006
														blank correction
Cycle	Time	202Hg	204Pb	206Pb	207Pb	208Pb	204Pb/208Pb (1)	206Pb/208Pb (2)	207Pb/208Pb (3)		204Pb_corr	204Pb_corr Pb/208Pb (1)		202Hg	204Pb	206Pb	207Pb	208Pb	204Pb/208Pb (1)	206Pb/208Pb (2)	207Pb/208Pb (3)		204Pb_corr_bl	204Pb_corr_bl Pb/208Pb (1)
1	1.75526e+09	0.000212928	0.0610674	1.04725	0.962571	2.29272	0.0266353	0.45677	0.419838		0.0610179	0.0266137		0.000219078	0.0610734	1.0472	0.962528	2.29261	0.0266392	0.456771	0.419839		0.0610225	0.026617
2	1.75526e+09	0.00020825	0.0614013	1.04955	0.96502	2.29747	0.0267256	0.456829	0.420036		0.061353	0.0267046		0.0002144	0.0614073	1.0495	0.964978	2.29736	0.0267295	0.45683	0.420038		0.0613575	0.0267078
3	1.75526e+09	-3.96581e-05	0.060817	1.03933	0.955001	2.2748	0.0267351	0.456891	0.419818		0.0608262	0.0267392		-3.35081e-05	0.0608229	1.03929	0.954958	2.27469	0.0267391	0.456893	0.41982		0.0608307	0.0267425
4	1.75526e+09	0.00013621	0.0602352	1.02801	0.945337	2.25076	0.0267621	0.45674	0.420008		0.0602035	0.0267481		0.00014236	0.0602412	1.02797	0.945295	2.25065	0.0267661	0.456741	0.420009		0.0602081	0.0267514
5	1.75526e+09	-0.000123839	0.0608534	1.03917	0.955968	2.27448	0.0267548	0.456882	0.420301		0.0608822	0.0267675		-0.000117689	0.0608594	1.03912	0.955925	2.27437	0.0267588	0.456883	0.420303		0.0608867	0.0267708
6	1.75526e+09	1.49977e-06	0.0603124	1.03711	0.952657	2.26926	0.0265781	0.457028	0.41981		0.0603121	0.0265779		7.64973e-06	0.0603184	1.03707	0.952615	2.26915	0.026582	0.457029	0.419812		0.0603167	0.0265812
7	1.75526e+09	0.000112822	0.0605279	1.03313	0.949592	2.26209	0.0267575	0.456716	0.419785		0.0605017	0.0267459		0.000118972	0.0605339	1.03309	0.94955	2.26198	0.0267614	0.456717	0.419787		0.0605062	0.0267492
8	1.75526e+09	2.43519e-06	0.0604689	1.03742	0.954361	2.27125	0.0266237	0.456762	0.420193		0.0604684	0.0266234		8.58515e-06	0.0604749	1.03737	0.954319	2.27114	0.0266276	0.456763	0.420195		0.0604729	0.0266267
9	1.75526e+09	2.48857e-05	0.0600739	1.02803	0.945394	2.25034	0.0266955	0.456831	0.420111		0.0600681	0.0266929		3.10356e-05	0.0600799	1.02798	0.945352	2.25023	0.0266994	0.456832	0.420113		0.0600727	0.0266962
10	1.75526e+09	-0.000262255	0.0603646	1.03322	0.949948	2.26188	0.0266878	0.456799	0.419982		0.0604255	0.0267148		-0.000256105	0.0603706	1.03318	0.949906	2.26177	0.0266918	0.4568	0.419983		0.0604301	0.0267181
11	1.75526e+09	0.000105337	0.0599329	1.02513	0.942646	2.24407	0.0267073	0.456819	0.420061		0.0599084	0.0266963		0.000111487	0.0599389	1.02509	0.942603	2.24396	0.0267112	0.456821	0.420063		0.059913	0.0266997
12	1.75526e+09	1.55312e-05	0.0605588	1.03401	0.950876	2.26415	0.0267468	0.456688	0.41997		0.0605552	0.0267452		2.16812e-05	0.0605648	1.03396	0.950834	2.26404	0.0267507	0.456689	0.419972		0.0605597	0.0267485
13	1.75526e+09	4.64012e-05	0.0600806	1.02534	0.942792	2.24472	0.0267654	0.456781	0.420005		0.0600699	0.0267606		5.25511e-05	0.0600866	1.0253	0.942749	2.24461	0.0267693	0.456782	0.420006		0.0600744	0.0267639
14	1.75526e+09	-6.58485e-05	0.0596481	1.01796	0.936266	2.22954	0.0267535	0.456576	0.419937		0.0596634	0.0267604		-5.96986e-05	0.0596541	1.01791	0.936224	2.22943	0.0267575	0.456577	0.419938		0.059668	0.0267637
15	1.75526e+09	-6.02363e-05	0.0592138	1.01606	0.934009	2.22321	0.0266343	0.457022	0.420117		0.0592278	0.0266406		-5.40864e-05	0.0592198	1.01601	0.933966	2.2231	0.0266383	0.457023	0.420118		0.0592324	0.026644
16	1.75526e+09	-3.87227e-05	0.059483	1.01843	0.935995	2.23002	0.0266738	0.456693	0.419725		0.059492	0.0266778		-3.25727e-05	0.059489	1.01839	0.935953	2.22991	0.0266778	0.456694	0.419727		0.0594966	0.0266812
17	1.75526e+09	5.94978e-05	0.0596693	1.02161	0.939272	2.23737	0.0266694	0.456614	0.419811		0.0596555	0.0266633		6.56478e-05	0.0596753	1.02157	0.93923	2.23726	0.0266734	0.456615	0.419813		0.0596601	0.0266666
18	1.75526e+09	0.00012779	0.0600565	1.02144	0.939351	2.23545	0.0268655	0.456929	0.420207		0.0600268	0.0268522		0.00013394	0.0600625	1.02139	0.939309	2.23534	0.0268695	0.45693	0.420208		0.0600314	0.0268556
19	1.75526e+09	0.000103466	0.0596143	1.02214	0.939714	2.23796	0.0266378	0.456729	0.419897		0.0595903	0.026627		0.000109616	0.0596203	1.02209	0.939672	2.23785	0.0266417	0.45673	0.419899		0.0595948	0.0266303
20	1.75526e+09	2.20793e-05	0.0596848	1.01872	0.936586	2.22992	0.0267654	0.456842	0.420008		0.0596796	0.0267631		2.82293e-05	0.0596908	1.01868	0.936543	2.22981	0.0267694	0.456843	0.42001		0.0596842	0.0267664
***	Cup	L3	L1	C	H1	H2	L1 | H2	C | H2	H1 | H2
***	Info	tbdgy	tbdgy	tbdgy	tbdgy	tbdgy	tbdgy - St	tbdgy - St	tbdgy - St
***	Mean	2.94287e-05	0.0602032	1.02965	0.946668	2.25407	0.0267087	0.456797	0.419981		0.0601964	0.0267057		3.55787e-05	0.0602092	1.02961	0.946625	2.25396	0.0267127	0.456798	0.419983		0.0602009	0.026709
***	StdErr (%)	85.9288	0.211415	0.214252	0.213541	0.213358	0.0564696	0.00576947	0.00831432		0.00209279	0.000561904		0.710755	0.00211394	0.00214262	0.00213551	0.00213368	0.000564691	5.76966e-05	8.31469e-05		0.00209264	0.000561915
***	StdErr (abs)	2.52878e-05	0.000127278	0.00220606	0.00202153	0.00480924	1.50823e-05	2.63548e-05	3.49186e-05
***	StdDev (%)	384.285	0.945475	0.958165	0.954985	0.954165	0.25254	0.0258019	0.0371828
***	StdDev (abs)	0.00011309	0.000569206	0.00986578	0.00904054	0.0215076	6.74501e-05	0.000117862	0.000156161
***	Valid Values	20 (20)	20 (20)	20 (20)	20 (20)	20 (20)	20 (20)	20 (20)	20 (20)

## Sheet: z_14_04
											M(202Hg)	g/mol	201.971	8e-07	K(204Hg)	1	0.990283			M	Meng Wang et al 2021 Chinese Phys. C 45 030003
											M(204Hg)	g/mol	203.973	5e-07	K(204Pb)	1	1.01985			x	De Laeter et al., 2003 IUPAC, Pure and Applied Chemistry 75, 683–800
											M(206Pb)	g/mol	205.974	1.2e-06	K(206Pb)	1	1.00962			R_cert	NIST SRM 981 certificate of analysis
											M(208Pb)	g/mol	207.977	1.2e-06	K(207Pb)	1	1.00452
											x(202Hg)	mol/mol	0.2986	0.0026
											x(204Hg)	mol/mol	0.0687	0.0015
											R204,cert	mol/mol	0.0272321
											R206,cert	mol/mol	0.461233
											R207,cert	mol/mol	0.421862
											g	1	-1.02006
														blank correction
Cycle	Time	202Hg	204Pb	206Pb	207Pb	208Pb	204Pb/208Pb (1)	206Pb/208Pb (2)	207Pb/208Pb (3)		204Pb_corr	204Pb_corr Pb/208Pb (1)		202Hg	204Pb	206Pb	207Pb	208Pb	204Pb/208Pb (1)	206Pb/208Pb (2)	207Pb/208Pb (3)		204Pb_corr_bl	204Pb_corr_bl Pb/208Pb (1)
1	1.75526e+09	-4.88314e-05	0.059811	1.02422	0.941254	2.2412	0.026687	0.456993	0.419977		0.0598224	0.0266921		-4.26814e-05	0.059817	1.02417	0.941212	2.2411	0.026691	0.456995	0.419979		0.059827	0.0266954
2	1.75526e+09	-0.000183516	0.0592705	1.01363	0.931633	2.21861	0.0267152	0.456878	0.419919		0.0593132	0.0267344		-0.000177366	0.0592765	1.01358	0.931591	2.2185	0.0267192	0.456879	0.41992		0.0593177	0.0267378
3	1.75526e+09	-0.00016294	0.0598323	1.02612	0.943295	2.24622	0.0266369	0.456821	0.419948		0.0598701	0.0266538		-0.00015679	0.0598383	1.02607	0.943252	2.24611	0.0266409	0.456822	0.41995		0.0598747	0.0266571
4	1.75526e+09	1.00988e-05	0.0603586	1.03348	0.949665	2.26158	0.0266887	0.456975	0.419913		0.0603563	0.0266877		1.62488e-05	0.0603646	1.03344	0.949623	2.26147	0.0266927	0.456976	0.419915		0.0603608	0.026691
5	1.75526e+09	0.000148552	0.0597367	1.02387	0.941558	2.24189	0.0266457	0.456701	0.419984		0.0597022	0.0266303		0.000154702	0.0597427	1.02383	0.941516	2.24178	0.0266497	0.456703	0.419986		0.0597068	0.0266336
6	1.75526e+09	0.000152294	0.0608359	1.04071	0.95704	2.27786	0.0267075	0.456881	0.420148		0.0608005	0.0266919		0.000158444	0.0608419	1.04067	0.956998	2.27775	0.0267114	0.456882	0.42015		0.0608051	0.0266952
7	1.75526e+09	0.00013639	0.0611036	1.04216	0.95792	2.28219	0.0267741	0.45665	0.419737		0.0610719	0.0267602		0.00014254	0.0611096	1.04212	0.957878	2.28209	0.026778	0.456651	0.419738		0.0610765	0.0267635
8	1.75526e+09	0.000122357	0.0619724	1.05962	0.974047	2.31985	0.026714	0.456764	0.419876		0.061944	0.0267018		0.000128507	0.0619784	1.05957	0.974005	2.31974	0.0267179	0.456765	0.419877		0.0619486	0.026705
9	1.75526e+09	1.00988e-05	0.0616344	1.05137	0.96678	2.30215	0.0267726	0.456692	0.419947		0.0616321	0.0267716		1.62488e-05	0.0616404	1.05132	0.966738	2.30204	0.0267765	0.456693	0.419949		0.0616366	0.0267748
10	1.75526e+09	0.000127034	0.0611708	1.04999	0.965687	2.29788	0.0266205	0.456941	0.420251		0.0611413	0.0266077		0.000133184	0.0611768	1.04995	0.965644	2.29777	0.0266244	0.456942	0.420253		0.0611458	0.0266109
11	1.75526e+09	0.00021685	0.0611785	1.04657	0.962234	2.29097	0.0267042	0.456824	0.420012		0.0611281	0.0266822		0.000223	0.0611845	1.04652	0.962191	2.29086	0.0267081	0.456825	0.420014		0.0611326	0.0266855
12	1.75526e+09	0.000117679	0.0617218	1.05515	0.968962	2.30825	0.0267396	0.457121	0.419782		0.0616944	0.0267278		0.000123829	0.0617278	1.0551	0.96892	2.30814	0.0267435	0.457122	0.419783		0.061699	0.026731
13	1.75526e+09	0.000156036	0.0600611	1.02692	0.943911	2.2482	0.0267152	0.456776	0.419852		0.0600249	0.0266991		0.000162186	0.0600671	1.02688	0.943869	2.24809	0.0267192	0.456778	0.419854		0.0600294	0.0267024
14	1.75526e+09	7.371e-05	0.0599375	1.02333	0.940737	2.23961	0.0267625	0.456924	0.420045		0.0599204	0.0267548		7.986e-05	0.0599435	1.02328	0.940695	2.2395	0.0267665	0.456925	0.420047		0.059925	0.0267582
15	1.75526e+09	-0.000204091	0.0599366	1.02518	0.942511	2.24408	0.0267088	0.456837	0.419999		0.059984	0.0267299		-0.000197941	0.0599426	1.02513	0.942469	2.24397	0.0267127	0.456838	0.420001		0.0599885	0.0267332
16	1.75526e+09	0.000213108	0.0609443	1.04458	0.960751	2.28597	0.0266602	0.456953	0.420282		0.0608948	0.0266385		0.000219258	0.0609503	1.04453	0.960708	2.28586	0.0266641	0.456954	0.420283		0.0608994	0.0266418
17	1.75526e+09	0.000215915	0.0606639	1.03804	0.954314	2.27231	0.026697	0.45682	0.419975		0.0606138	0.0266749		0.000222064	0.0606699	1.03799	0.954272	2.2722	0.0267009	0.456821	0.419977		0.0606183	0.0266782
18	1.75526e+09	0.000289832	0.0609309	1.04	0.95594	2.27777	0.0267502	0.456585	0.419682		0.0608636	0.0267207		0.000295981	0.0609369	1.03995	0.955898	2.27766	0.0267541	0.456586	0.419684		0.0608681	0.026724
19	1.75526e+09	-2.45114e-05	0.0615221	1.05143	0.966234	2.3013	0.0267336	0.456887	0.419864		0.0615278	0.0267361		-1.83615e-05	0.0615281	1.05139	0.966191	2.30119	0.0267375	0.456888	0.419866		0.0615323	0.0267393
20	1.75526e+09	-0.000128335	0.0613157	1.04769	0.963509	2.29374	0.0267318	0.456762	0.42006		0.0613455	0.0267448		-0.000122185	0.0613217	1.04765	0.963467	2.29363	0.0267356	0.456763	0.420062		0.0613501	0.026748
***	Cup	L3	L1	C	H1	H2	L1 | H2	C | H2	H1 | H2
***	Info	tbdgy	tbdgy	tbdgy	tbdgy	tbdgy	tbdgy - St	tbdgy - St	tbdgy - St
***	Mean	6.18864e-05	0.0606969	1.0382	0.954399	2.27258	0.0267083	0.456839	0.419963		0.0606826	0.026702		6.80364e-05	0.0607029	1.03816	0.954357	2.27247	0.0267122	0.45684	0.419964		0.0606871	0.0267053
***	StdErr (%)	52.8564	0.287115	0.277343	0.277476	0.277452	0.036172	0.00630409	0.0080749		0.00282556	0.000378314		0.480786	0.00287086	0.00277355	0.00277488	0.00277465	0.000361601	6.3044e-05	8.07527e-05		0.00282535	0.000378264
***	StdErr (abs)	3.2711e-05	0.00017427	0.00287938	0.00264823	0.00630532	9.66091e-06	2.87996e-05	3.39116e-05
***	StdDev (%)	236.381	1.28402	1.24031	1.24091	1.2408	0.161766	0.0281928	0.0361121
***	StdDev (abs)	0.000146288	0.000779358	0.012877	0.0118432	0.0281982	4.32049e-05	0.000128796	0.000151657
***	Valid Values	20 (20)	20 (20)	20 (20)	20 (20)	20 (20)	20 (20)	20 (20)	20 (20)

## Sheet: z_14c_01
											M(202Hg)	g/mol	201.971	8e-07	K(204Hg)	1	0.990745			M	Meng Wang et al 2021 Chinese Phys. C 45 030003
											M(204Hg)	g/mol	203.973	5e-07	K(204Pb)	1	1.02187			x	De Laeter et al., 2003 IUPAC, Pure and Applied Chemistry 75, 683–800
											M(206Pb)	g/mol	205.974	1.2e-06	K(206Pb)	1	1.00916			R_cert	NIST SRM 981 certificate of analysis
											M(208Pb)	g/mol	207.977	1.2e-06	K(207Pb)	1	1.00493
											x(202Hg)	mol/mol	0.2986	0.0026
											x(204Hg)	mol/mol	0.0687	0.0015
											R204,cert	mol/mol	0.0272321
											R206,cert	mol/mol	0.461233
											R207,cert	mol/mol	0.421862
											g	1	-1.02006
														blank correction
Cycle	Time	202Hg	204Pb	206Pb	207Pb	208Pb	204Pb/208Pb (1)	206Pb/208Pb (2)	207Pb/208Pb (3)		204Pb_corr	204Pb_corr Pb/208Pb (1)		202Hg	204Pb	206Pb	207Pb	208Pb	204Pb/208Pb (1)	206Pb/208Pb (2)	207Pb/208Pb (3)		204Pb_corr_bl	204Pb_corr_bl Pb/208Pb (1)
1	1.75526e+09	0.000234177	0.0396613	0.681121	0.625901	1.48987	0.0266207	0.457169	0.420106		0.0396069	0.0265842		0.000240327	0.0396673	0.681074	0.625859	1.48976	0.0266267	0.457171	0.420108		0.0396115	0.0265892
2	1.75526e+09	7.60672e-05	0.040202	0.686184	0.630273	1.50056	0.0267913	0.457285	0.420025		0.0401844	0.0267795		8.22171e-05	0.040208	0.686137	0.630231	1.50045	0.0267972	0.457287	0.420027		0.0401889	0.0267845
3	1.75526e+09	-4.17973e-05	0.0397004	0.682563	0.62726	1.49463	0.0265621	0.456678	0.419677		0.0397101	0.0265686		-3.56473e-05	0.0397064	0.682516	0.627217	1.49452	0.026568	0.45668	0.419679		0.0397146	0.0265736
4	1.75526e+09	3.86484e-05	0.0402325	0.684975	0.629241	1.49895	0.0268404	0.456969	0.419787		0.0402236	0.0268345		4.47983e-05	0.0402385	0.684928	0.629198	1.49884	0.0268464	0.456971	0.419789		0.0402281	0.0268395
5	1.75526e+09	0.00015278	0.0393572	0.676544	0.621692	1.4803	0.0265873	0.457032	0.419977		0.0393217	0.0265633		0.00015893	0.0393632	0.676497	0.62165	1.48019	0.0265933	0.457034	0.41998		0.0393263	0.0265684
6	1.75526e+09	-0.000163389	0.039935	0.686338	0.630045	1.50175	0.0265923	0.457026	0.419541		0.0399729	0.0266176		-0.000157239	0.0399409	0.686291	0.630002	1.50164	0.0265982	0.457028	0.419543		0.0399775	0.0266226
7	1.75526e+09	-0.000128783	0.0393448	0.675561	0.620581	1.47838	0.0266135	0.456961	0.419772		0.0393747	0.0266337		-0.000122633	0.0393508	0.675514	0.620539	1.47827	0.0266195	0.456963	0.419774		0.0393793	0.0266388
8	1.75526e+09	0.000153716	0.0390989	0.673669	0.618539	1.47337	0.0265371	0.45723	0.419813		0.0390632	0.0265128		0.000159866	0.0391049	0.673622	0.618497	1.47326	0.0265431	0.457232	0.419815		0.0390678	0.0265179
9	1.75526e+09	-0.000158712	0.0393219	0.676924	0.621943	1.48095	0.0265518	0.457087	0.419961		0.0393588	0.0265767		-0.000152562	0.0393279	0.676877	0.6219	1.48084	0.0265578	0.457089	0.419964		0.0393633	0.0265817
10	1.75526e+09	-3.6185e-05	0.0393705	0.676053	0.62093	1.479	0.0266197	0.457101	0.419831		0.0393789	0.0266253		-3.0035e-05	0.0393765	0.676006	0.620888	1.47889	0.0266257	0.457103	0.419833		0.0393835	0.0266304
11	1.75526e+09	0.00025289	0.0396804	0.680554	0.625184	1.48991	0.0266327	0.456774	0.419611		0.0396216	0.0265933		0.00025904	0.0396863	0.680507	0.625141	1.4898	0.0266386	0.456776	0.419613		0.0396262	0.0265983
12	1.75526e+09	0.000102261	0.0397175	0.678483	0.622761	1.48394	0.0267649	0.457217	0.419666		0.0396938	0.0267489		0.000108411	0.0397235	0.678436	0.622718	1.48383	0.0267709	0.457218	0.419669		0.0396984	0.0267539
13	1.75526e+09	0.000139682	0.0393286	0.673926	0.618649	1.47403	0.026681	0.457199	0.419698		0.0392962	0.026659		0.000145832	0.0393346	0.673879	0.618607	1.47392	0.026687	0.457201	0.419701		0.0393007	0.026664
14	1.75526e+09	0.000275346	0.0396346	0.678585	0.623266	1.48519	0.0266866	0.456902	0.419654		0.0395706	0.0266435		0.000281496	0.0396406	0.678538	0.623223	1.48508	0.0266926	0.456904	0.419657		0.0395752	0.0266486
15	1.75526e+09	0.000157458	0.0390036	0.664472	0.610805	1.45456	0.0268147	0.456819	0.419923		0.0389671	0.0267896		0.000163608	0.0390096	0.664425	0.610762	1.45445	0.0268208	0.456821	0.419926		0.0389716	0.0267947
16	1.75526e+09	0.000109745	0.039626	0.676781	0.621408	1.47972	0.0267794	0.45737	0.41995		0.0396005	0.0267621		0.000115895	0.039632	0.676734	0.621366	1.47961	0.0267854	0.457372	0.419952		0.0396051	0.0267672
17	1.75526e+09	6.57768e-05	0.0388036	0.669388	0.614548	1.46389	0.0265071	0.457266	0.419804		0.0387883	0.0264967		7.19268e-05	0.0388096	0.669341	0.614505	1.46378	0.0265132	0.457268	0.419806		0.0387929	0.0265018
18	1.75526e+09	-6.05046e-05	0.0387969	0.664014	0.609239	1.45228	0.0267145	0.457223	0.419506		0.0388109	0.0267242		-5.43547e-05	0.0388029	0.663967	0.609197	1.45217	0.0267207	0.457224	0.419508		0.0388155	0.0267293
19	1.75526e+09	0.000327745	0.0381712	0.652423	0.599795	1.42782	0.026734	0.456937	0.420079		0.0380951	0.0266807		0.000333895	0.0381772	0.652376	0.599753	1.42771	0.0267402	0.456939	0.420081		0.0380997	0.0266859
20	1.75526e+09	0.000268796	0.0383778	0.658018	0.604329	1.44075	0.0266374	0.456718	0.419454		0.0383154	0.026594		0.000274946	0.0383838	0.657971	0.604287	1.44064	0.0266435	0.45672	0.419456		0.03832	0.0265992
***	Cup	L3	L1	C	H1	H2	L1 | H2	C | H2	H1 | H2
***	Info	tbdgy	tbdgy	tbdgy	tbdgy	tbdgy	tbdgy - St	tbdgy - St	tbdgy - St
***	Mean	8.82859e-05	0.0393682	0.674829	0.619819	1.47649	0.0266634	0.457048	0.419792		0.0393477	0.0266494		9.44359e-05	0.0393742	0.674782	0.619777	1.47638	0.0266694	0.45705	0.419794		0.0393523	0.0266545
***	StdErr (%)	37.6099	0.307953	0.301954	0.300873	0.300564	0.0826578	0.00979742	0.0101565		0.00314833	0.000802113		0.351606	0.00307906	0.00301976	0.00300894	0.00300586	0.000826492	9.79794e-05	0.000101571		0.00314796	0.000801996
***	StdErr (abs)	3.32042e-05	0.000121236	0.00203768	0.00186487	0.0044378	2.20394e-05	4.47789e-05	4.26359e-05
***	StdDev (%)	168.197	1.37721	1.35038	1.34554	1.34416	0.369657	0.0438154	0.045421
***	StdDev (abs)	0.000148494	0.000542182	0.00911276	0.00833995	0.0198465	9.85632e-05	0.000200257	0.000190674
***	Valid Values	20 (20)	20 (20)	20 (20)	20 (20)	20 (20)	20 (20)	20 (20)	20 (20)

## Sheet: z_14c_02
											M(202Hg)	g/mol	201.971	8e-07	K(204Hg)	1	0.990866			M	Meng Wang et al 2021 Chinese Phys. C 45 030003
											M(204Hg)	g/mol	203.973	5e-07	K(204Pb)	1	1.02039			x	De Laeter et al., 2003 IUPAC, Pure and Applied Chemistry 75, 683–800
											M(206Pb)	g/mol	205.974	1.2e-06	K(206Pb)	1	1.00904			R_cert	NIST SRM 981 certificate of analysis
											M(208Pb)	g/mol	207.977	1.2e-06	K(207Pb)	1	1.00504
											x(202Hg)	mol/mol	0.2986	0.0026
											x(204Hg)	mol/mol	0.0687	0.0015
											R204,cert	mol/mol	0.0272321
											R206,cert	mol/mol	0.461233
											R207,cert	mol/mol	0.421862
											g	1	-1.02006
														blank correction
Cycle	Time	202Hg	204Pb	206Pb	207Pb	208Pb	204Pb/208Pb (1)	206Pb/208Pb (2)	207Pb/208Pb (3)		204Pb_corr	204Pb_corr Pb/208Pb (1)		202Hg	204Pb	206Pb	207Pb	208Pb	204Pb/208Pb (1)	206Pb/208Pb (2)	207Pb/208Pb (3)		204Pb_corr_bl	204Pb_corr_bl Pb/208Pb (1)
1	1.75526e+09	-3.36169e-05	0.0395319	0.680661	0.624862	1.48896	0.0265501	0.45714	0.419664		0.0395397	0.0265553		-2.7467e-05	0.0395379	0.680614	0.624819	1.48885	0.026556	0.457142	0.419667		0.0395443	0.0265603
2	1.75526e+09	-0.000182336	0.0394794	0.676207	0.620694	1.47914	0.0266908	0.457161	0.419631		0.0395218	0.0267194		-0.000176186	0.0394854	0.67616	0.620651	1.47903	0.0266968	0.457163	0.419633		0.0395264	0.0267244
3	1.75526e+09	0.000115124	0.039043	0.666992	0.612686	1.45902	0.0267598	0.457152	0.419931		0.0390162	0.0267415		0.000121274	0.039049	0.666944	0.612644	1.45891	0.0267659	0.457154	0.419934		0.0390208	0.0267466
4	1.75526e+09	-4.01648e-05	0.0387705	0.66175	0.607721	1.44812	0.0267729	0.45697	0.419661		0.0387798	0.0267794		-3.40148e-05	0.0387765	0.661703	0.607678	1.44801	0.0267791	0.456972	0.419663		0.0387844	0.0267845
5	1.75526e+09	-7.66448e-05	0.039183	0.669916	0.615018	1.46524	0.0267418	0.457206	0.41974		0.0392008	0.0267539		-7.04949e-05	0.039189	0.669868	0.614976	1.46513	0.0267478	0.457208	0.419742		0.0392054	0.026759
6	1.75526e+09	-4.85834e-05	0.0391201	0.674239	0.619061	1.47432	0.0265343	0.457321	0.419894		0.0391314	0.0265419		-4.24334e-05	0.0391261	0.674192	0.619018	1.47422	0.0265403	0.457322	0.419897		0.039136	0.026547
7	1.75526e+09	4.02831e-05	0.0396758	0.680364	0.62404	1.48727	0.026677	0.457459	0.419588		0.0396665	0.0266707		4.64331e-05	0.0396818	0.680317	0.623997	1.48716	0.026683	0.457461	0.41959		0.039671	0.0266757
8	1.75526e+09	6.17994e-05	0.0392631	0.671439	0.616456	1.46899	0.026728	0.457076	0.419647		0.0392487	0.0267182		6.79493e-05	0.0392691	0.671392	0.616413	1.46888	0.0267341	0.457078	0.419649		0.0392533	0.0267233
9	1.75526e+09	-0.00019917	0.0396835	0.679589	0.623841	1.48759	0.0266764	0.45684	0.419364		0.0397297	0.0267075		-0.00019302	0.0396895	0.679541	0.623798	1.48748	0.0266824	0.456841	0.419366		0.0397343	0.0267125
10	1.75526e+09	-1.30377e-05	0.039408	0.674155	0.619266	1.47551	0.026708	0.456895	0.419696		0.039411	0.02671		-6.88778e-06	0.039414	0.674108	0.619224	1.4754	0.026714	0.456897	0.419698		0.0394156	0.0267151
11	1.75526e+09	0.000115124	0.0398818	0.680303	0.624732	1.48864	0.0267908	0.456998	0.419667		0.0398551	0.0267729		0.000121274	0.0398878	0.680256	0.624689	1.48853	0.0267968	0.456999	0.41967		0.0398596	0.0267779
12	1.75526e+09	-4.48418e-05	0.0392383	0.673335	0.618283	1.47257	0.0266461	0.457251	0.419866		0.0392487	0.0266532		-3.86918e-05	0.0392443	0.673288	0.618241	1.47246	0.0266521	0.457252	0.419868		0.0392533	0.0266582
13	1.75526e+09	0.000195585	0.0394756	0.674552	0.619909	1.47615	0.0267424	0.456968	0.419951		0.0394302	0.0267116		0.000201735	0.0394816	0.674505	0.619867	1.47604	0.0267484	0.45697	0.419953		0.0394348	0.0267167
14	1.75526e+09	0.000144127	0.0383257	0.662384	0.607962	1.44858	0.0264575	0.457266	0.419697		0.0382923	0.0264344		0.000150277	0.0383317	0.662337	0.60792	1.44847	0.0264637	0.457268	0.419699		0.0382968	0.0264396
15	1.75526e+09	0.000262016	0.0380049	0.650787	0.5975	1.42307	0.0267063	0.457313	0.419868		0.0379441	0.0266636		0.000268166	0.0380109	0.65074	0.597458	1.42296	0.0267126	0.457315	0.41987		0.0379487	0.0266688
16	1.75526e+09	5.89929e-05	0.0376376	0.64202	0.589711	1.40512	0.0267861	0.456916	0.419688		0.0376239	0.0267763		6.51428e-05	0.0376436	0.641973	0.589668	1.40501	0.0267924	0.456918	0.419691		0.0376284	0.0267817
17	1.75526e+09	0.000105769	0.0376471	0.644315	0.592181	1.40994	0.0267012	0.456981	0.420005		0.0376225	0.0266838		0.000111919	0.0376531	0.644268	0.592139	1.40983	0.0267076	0.456983	0.420008		0.0376271	0.0266891
18	1.75526e+09	2.99929e-05	0.037433	0.638786	0.586806	1.3976	0.0267837	0.457058	0.419865		0.0374261	0.0267787		3.61429e-05	0.037439	0.638739	0.586763	1.3975	0.0267901	0.45706	0.419868		0.0374306	0.0267841
19	1.75526e+09	-0.000113124	0.0371734	0.634895	0.583037	1.38868	0.0267689	0.457195	0.419851		0.0371996	0.0267878		-0.000106974	0.0371794	0.634848	0.582995	1.38857	0.0267753	0.457196	0.419853		0.0372042	0.0267932
20	1.75526e+09	0.000177808	0.0380249	0.652491	0.599311	1.42809	0.0266264	0.456897	0.419658		0.0379836	0.0265974		0.000183958	0.0380309	0.652444	0.599268	1.42798	0.0266326	0.456899	0.41966		0.0379882	0.0266027
***	Cup	L3	L1	C	H1	H2	L1 | H2	C | H2	H1 | H2
***	Info	tbdgy	tbdgy	tbdgy	tbdgy	tbdgy	tbdgy - St	tbdgy - St	tbdgy - St
***	Mean	2.77551e-05	0.0388	0.664459	0.610154	1.45363	0.0266924	0.457103	0.419747		0.0387936	0.0266879		3.39051e-05	0.038806	0.664412	0.610111	1.45352	0.0266986	0.457105	0.419749		0.0387982	0.026693
***	StdErr (%)	99.5793	0.4931	0.510532	0.506079	0.509497	0.0763492	0.00830072	0.00820024		0.00497632	0.000782305		0.815169	0.00493024	0.00510568	0.00506115	0.00509536	0.00076373	8.30107e-05	8.20202e-05		0.00497573	0.000782453
***	StdErr (abs)	2.76384e-05	0.000191323	0.00339228	0.00308786	0.0074062	2.03795e-05	3.79429e-05	3.44202e-05
***	StdDev (%)	445.332	2.20521	2.28317	2.26326	2.27854	0.341444	0.037122	0.0366726
***	StdDev (abs)	0.000123603	0.000855623	0.0151707	0.0138093	0.0331215	9.11397e-05	0.000169686	0.000153932
***	Valid Values	20 (20)	20 (20)	20 (20)	20 (20)	20 (20)	20 (20)	20 (20)	20 (20)

## Sheet: z_14c_03
											M(202Hg)	g/mol	201.971	8e-07	K(204Hg)	1	0.990644			M	Meng Wang et al 2021 Chinese Phys. C 45 030003
											M(204Hg)	g/mol	203.973	5e-07	K(204Pb)	1	1.02067			x	De Laeter et al., 2003 IUPAC, Pure and Applied Chemistry 75, 683–800
											M(206Pb)	g/mol	205.974	1.2e-06	K(206Pb)	1	1.00926			R_cert	NIST SRM 981 certificate of analysis
											M(208Pb)	g/mol	207.977	1.2e-06	K(207Pb)	1	1.00506
											x(202Hg)	mol/mol	0.2986	0.0026
											x(204Hg)	mol/mol	0.0687	0.0015
											R204,cert	mol/mol	0.0272321
											R206,cert	mol/mol	0.461233
											R207,cert	mol/mol	0.421862
											g	1	-1.02006
														blank correction
Cycle	Time	202Hg	204Pb	206Pb	207Pb	208Pb	204Pb/208Pb (1)	206Pb/208Pb (2)	207Pb/208Pb (3)		204Pb_corr	204Pb_corr Pb/208Pb (1)		202Hg	204Pb	206Pb	207Pb	208Pb	204Pb/208Pb (1)	206Pb/208Pb (2)	207Pb/208Pb (3)		204Pb_corr_bl	204Pb_corr_bl Pb/208Pb (1)
1	1.75526e+09	-0.000160741	0.0401859	0.693623	0.636692	1.51794	0.0264739	0.456949	0.419444		0.0402232	0.0264985		-0.000154591	0.0401919	0.693576	0.63665	1.51783	0.0264797	0.456951	0.419446		0.0402278	0.0265034
2	1.75526e+09	-0.000199086	0.0403986	0.689589	0.633466	1.50879	0.0267754	0.457046	0.419849		0.0404448	0.0268061		-0.000192936	0.0404046	0.689542	0.633424	1.50869	0.0267813	0.457048	0.419851		0.0404494	0.026811
3	1.75526e+09	-0.000200022	0.0403213	0.694431	0.637334	1.5185	0.0265534	0.457314	0.419713		0.0403678	0.026584		-0.000193872	0.0403273	0.694384	0.637292	1.51839	0.0265592	0.457315	0.419715		0.0403724	0.0265889
4	1.75526e+09	-1.10865e-05	0.040163	0.68994	0.633906	1.51015	0.0265953	0.456867	0.419762		0.0401655	0.026597		-4.93659e-06	0.040169	0.689893	0.633863	1.51005	0.0266012	0.456869	0.419764		0.0401701	0.0266019
5	1.75526e+09	-5.59853e-05	0.0400561	0.689416	0.633179	1.50818	0.0265592	0.457117	0.419829		0.0400691	0.0265679		-4.98353e-05	0.0400621	0.689369	0.633136	1.50807	0.0265651	0.457119	0.419832		0.0400737	0.0265728
6	1.75526e+09	9.92982e-05	0.0402984	0.690907	0.634601	1.5123	0.0266472	0.456859	0.419627		0.0402754	0.0266319		0.000105448	0.0403044	0.69086	0.634558	1.51219	0.026653	0.456861	0.419629		0.0402799	0.0266368
7	1.75526e+09	-1.95052e-05	0.0401162	0.686069	0.629887	1.50125	0.0267218	0.456997	0.419573		0.0401208	0.0267248		-1.33553e-05	0.0401222	0.686021	0.629844	1.50115	0.0267277	0.456999	0.419576		0.0401253	0.0267298
8	1.75526e+09	1.88471e-05	0.0406668	0.691994	0.636186	1.51492	0.0268442	0.456787	0.419947		0.0406624	0.0268413		2.4997e-05	0.0406727	0.691947	0.636144	1.51481	0.0268501	0.456788	0.41995		0.0406669	0.0268462
9	1.75526e+09	-7.28218e-05	0.0406343	0.695159	0.638815	1.52201	0.0266978	0.456737	0.419718		0.0406512	0.0267089		-6.66718e-05	0.0406403	0.695112	0.638773	1.5219	0.0267036	0.456739	0.41972		0.0406558	0.0267138
10	1.75526e+09	-5.22438e-05	0.0406257	0.69281	0.63633	1.51664	0.0267867	0.456806	0.419566		0.0406379	0.0267947		-4.60938e-05	0.0406317	0.692763	0.636288	1.51653	0.0267926	0.456808	0.419568		0.0406424	0.0267996
11	1.75526e+09	0.000279869	0.0400933	0.688541	0.632342	1.50715	0.0266021	0.45685	0.419561		0.0400283	0.026559		0.000286019	0.0400993	0.688494	0.632299	1.50704	0.026608	0.456851	0.419563		0.0400329	0.0265639
12	1.75526e+09	-7.93692e-05	0.0404368	0.693335	0.63689	1.51799	0.0266383	0.456744	0.41956		0.0404552	0.0266505		-7.32193e-05	0.0404428	0.693288	0.636847	1.51788	0.0266442	0.456746	0.419562		0.0404598	0.0266554
13	1.75526e+09	6.09428e-05	0.0404807	0.692677	0.635905	1.51507	0.0267186	0.45719	0.419719		0.0404665	0.0267093		6.70927e-05	0.0404867	0.69263	0.635862	1.51497	0.0267245	0.457192	0.419721		0.0404711	0.0267142
14	1.75526e+09	-4.47608e-05	0.0403957	0.692041	0.635854	1.51446	0.0266734	0.456956	0.419856		0.0404061	0.0266803		-3.86108e-05	0.0404017	0.691993	0.635812	1.51435	0.0266793	0.456958	0.419858		0.0404107	0.0266852
15	1.75526e+09	6.09428e-05	0.040328	0.692175	0.635597	1.51393	0.026638	0.457206	0.419834		0.0403139	0.0266287		6.70927e-05	0.040334	0.692128	0.635555	1.51382	0.0266439	0.457207	0.419836		0.0403184	0.0266336
16	1.75526e+09	-0.000111171	0.040412	0.692626	0.635786	1.51438	0.0266855	0.457366	0.419833		0.0404378	0.0267026		-0.000105021	0.040418	0.692578	0.635743	1.51427	0.0266914	0.457368	0.419835		0.0404424	0.0267075
17	1.75526e+09	3.00724e-05	0.04106	0.699659	0.642875	1.53048	0.0268282	0.45715	0.420048		0.0410531	0.0268236		3.62224e-05	0.041066	0.699612	0.642833	1.53037	0.026834	0.457151	0.42005		0.0410576	0.0268285
18	1.75526e+09	0.000142333	0.0405942	0.693025	0.636985	1.51654	0.0267676	0.456976	0.420024		0.0405612	0.0267458		0.000148483	0.0406002	0.692978	0.636943	1.51644	0.0267735	0.456978	0.420026		0.0405657	0.0267507
19	1.75526e+09	0.000155431	0.0402565	0.692478	0.635713	1.51506	0.0265709	0.457064	0.419596		0.0402204	0.0265471		0.000161581	0.0402625	0.692431	0.63567	1.51495	0.0265768	0.457066	0.419599		0.0402249	0.026552
20	1.75526e+09	0.000191919	0.0406524	0.692303	0.635672	1.51465	0.0268394	0.45707	0.419681		0.0406079	0.02681		0.000198069	0.0406584	0.692256	0.635629	1.51454	0.0268453	0.457072	0.419684		0.0406124	0.026815
***	Cup	L3	L1	C	H1	H2	L1 | H2	C | H2	H1 | H2
***	Info	tbdgy	tbdgy	tbdgy	tbdgy	tbdgy	tbdgy - St	tbdgy - St	tbdgy - St
***	Mean	1.64313e-06	0.0404088	0.69214	0.635701	1.51452	0.0266808	0.457003	0.419737		0.0404084	0.0266806		7.79309e-06	0.0404148	0.692093	0.635658	1.51441	0.0266867	0.457004	0.419739		0.040413	0.0266855
***	StdErr (%)	1754.69	0.136594	0.089725	0.0918231	0.0888109	0.0878835	0.00898395	0.00879506		0.00136836	0.000861776		3.69967	0.00136574	0.000897312	0.000918292	0.000888173	0.000878668	8.98455e-05	8.7955e-05		0.0013682	0.000861643
***	StdErr (abs)	2.88318e-05	5.51962e-05	0.000621023	0.00058372	0.00134506	2.34481e-05	4.10569e-05	3.69161e-05
***	StdDev (%)	7847.23	0.610869	0.401263	0.410645	0.397174	0.393027	0.0401774	0.0393327
***	StdDev (abs)	0.00012894	0.000246845	0.0027773	0.00261047	0.00601529	0.000104863	0.000183612	0.000165094
***	Valid Values	20 (20)	20 (20)	20 (20)	20 (20)	20 (20)	20 (20)	20 (20)	20 (20)

[truncated: 21 more sheets: z_14c_04, z_14dc_01, z_14dc_02, z_14dc_03, z_14dc_04, z_135_01, z_135_02, z_135_03, z_135_04, z_135c_01, z_135c_02, z_135c_03, z_135c_04, z_135dc_01, z_135dc_02, z_135dc_03, z_135dc_04, z_ref_01, z_ref_02, z_ref_03 …]
