# Supplementary material
Source: Royal Society of Chemistry journal article supplement (doi:10.1039/d6ja00106h)
Supplement: d6ja00106h4.xlsx [file d6ja00106h4.xlsx]

## Sheet: Results Summary
			ratio
			204Pb/208Pb							204Pb/208Pb
	seq	material	Ktotal,sol	u(Ktotal,sol)	Ktotal,col	u(Ktotal,col)	Ktotal,dig, col	u(Ktotal,dig,col)			u_zref(Ktotal,sol)
		SRM 981	(mol/mol) / (V/V)	(mol/mol) / (V/V)	(mol/mol) / (V/V)	(mol/mol) / (V/V)	(mol/mol) / (V/V)	(mol/mol) / (V/V)		z_ref	(mol/mol) / (V/V)
	A (2)	z_14	1.02049	0.000547017	1.02072	0.000842511	1.02117	0.00108801		1.02017	0.000478626
		z_135	1.02031	0.00062639	1.02074	0.000766828	1.02052	0.00133856
	B (3)	z_14	1.02002	0.000654109	1.02124	0.000871642	1.02063	0.00115039		1.01997	0.000505415
		z_135	1.02028	0.000568947	1.02074	0.000770032	1.02129	0.00134894
	C (4)	z_14	1.02005	0.000649686	1.0207	0.00093762	1.0208	0.00123132		1.02037	0.000503833
		z_135	1.02041	0.000620708	1.02116	0.00368787	1.02131	0.00131744
204Pb/208Pb	average		1.02026	0.000612444	1.02088	0.00168968	1.02096	0.00124969		1.02017	0.00049611
			ratio
			206Pb/208Pb
	seq	material	Ktotal,sol	u(Ktotal,sol)	Ktotal,col	u(Ktotal,col)	Ktotal,dig, col	u(Ktotal,dig,col)
		SRM 981	(mol/mol) / (V/V)	(mol/mol) / (V/V)	(mol/mol) / (V/V)	(mol/mol) / (V/V)	(mol/mol) / (V/V)	(mol/mol) / (V/V)
	A (2)	z_14	1.00964	0.000200755	1.00906	0.00020857	1.00929	0.000209873
		z_135	1.00966	0.000199794	1.00927	0.000207067	1.00917	0.000220065
	B (3)	z_14	1.00965	0.000200808	1.00911	0.000200754	1.00932	0.000222052
		z_135	1.00971	0.000202753	1.00909	0.00020801	1.00919	0.000187515
	C (4)	z_14	1.00969	0.000196513	1.00917	0.000205783	1.0093	0.000217723
		z_135	1.00971	0.000199289	1.00797	0.000357202	1.00924	0.000226134
206Pb/208Pb	average		1.00968	0.000199994	1.00894	0.000238008	1.00925	0.000214276
					0.000733501		0.000426219
			ratio
			207Pb/208Pb
	seq	material	Ktotal,sol	u(Ktotal,sol)	Ktotal,col	u(Ktotal,col)	Ktotal,dig, col	u(Ktotal,dig,col)
		SRM 981	(mol/mol) / (V/V)	(mol/mol) / (V/V)	(mol/mol) / (V/V)	(mol/mol) / (V/V)	(mol/mol) / (V/V)	(mol/mol) / (V/V)
	A (2)	z_14	1.00448	0.000269257	1.00492	0.000276047	1.00482	0.000285924
		z_135	1.00445	0.000267262	1.00482	0.000269764	1.00485	0.000282777
	B (3)	z_14	1.00449	0.000270605	1.00498	0.000279511	1.00477	0.000290546
		z_135	1.00451	0.000266754	1.00476	0.000277511	1.00491	0.000286822
	C (4)	z_14	1.00448	0.000270261	1.005	0.000274513	1.00475	0.000280282
		z_135	1.00454	0.000269257	1.00552	0.000406359	1.00487	0.000286179
207Pb/208Pb	average		1.00449	0.000268903	1.005	0.000301275	1.00483	0.00028544
